# Supplementary material for: Stereoselective synthesis of d-glycero-d-manno-heptose-1β,7-bisphosphate (HBP) from d-mannurono-2,6-lactone
Source: Royal Society of Chemistry journal article supplement (doi:10.1039/d4ob00139g), 2024-01-01

Supporting Information

**Synthesis of D-glycero-D-manno-heptose-1 $\beta$ ,7-bisphosphate (HBP)  
from D-mannurono-2,6-lactone**

Yuta Shinotsuka,<sup>a</sup> Riko Nakajima,<sup>a</sup> Kohei Ogawa,<sup>a</sup> Kaede Takise,<sup>a</sup> Yutaka Takeuchi,<sup>b</sup>  
Hiroshi Tanaka,<sup>b</sup> and Kaname Sasaki <sup>\*a</sup>

*a. Department of Chemistry, Toho University. 2-2-1 Miyama, Funabashi 274-8510 Japan.*

*b. Department of Chemical Science and Engineering, Tokyo Institute of Technology. 2-12-1-H101,  
Ookayama, Muguro-ku Tokyo 152-8552 Japan.*

*Kaname.sasaki@sci.toho-u.ac.jp*

**Table of Contents**

Experimental procedure

<sup>1</sup>H, <sup>13</sup>C and <sup>31</sup>P NMR spectra of new compounds

## General Information

Analytical thin layer chromatography (TLC) was performed using Merck KGaA TLC 60F-254 plates (0.25 mm), and visualization was accomplished by 10% sulfuric acid in EtOH or PMA (Phosphomolybdic acid), followed by heating or UV irradiation (254 nm). Specific rotations were measured on an automatic polarimeter with a path length of 50 mm in the solvent specified. Concentrations are given in g/100 mL. Optical rotations were measured on a JASCO P-2200 photoelectric polarimeter.  $^1\text{H}$ ,  $^{13}\text{C}$  and  $^{31}\text{P}$  NMR spectra were recorded on a JEOL Ltd. JNM-ECP400 series (400 MHz). Chemical shifts ( $\delta$ ) are reported in parts per million (ppm) downfield or upfield from tetramethylsilane ( $\delta$  0.00),  $\text{CHCl}_3$  ( $\delta$  7.26), or DHO ( $\delta$  4.79) integration, multiplicity (s = singlet, d = doublet, t = triplet, q = quartet, and m = multiplet) and coupling constants (Hz).  $^{13}\text{C}$  chemical shifts are reported in ppm downfield or upfield from  $\text{CDCl}_3$  ( $\delta$  77.36). High-resolution mass spectra (HRMS) were recorded on a JEOL Ltd. AccuTOFCS JIMS-T100CS with an electrospray ionization (ESI) source coupled. Silica-gel column chromatography was performed on FUJI SILYSIA CHEMICAL Ltd. Silica Gel PSQ60B 46-50  $\mu\text{m}$  (spherical, neutral).

## Experimental procedure

### Allyl 3-O-benzyl-4-O-tert-butyldimethylsilyl-7-deoxy-7-iodo-6-oxo- $\alpha$ -D-manno-heptopyranoside (2)

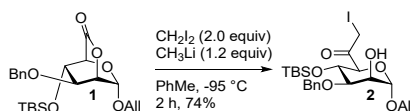

Under Ar atmosphere, to a solution of **1** (3.6 g, 8.6 mmol) in anhydrous PhMe (43 mL) was added  $\text{CH}_2\text{I}_2$  (1.4 mL, 17 mmol) at 25  $^\circ\text{C}$ . Then the mixture was cooled to -95  $^\circ\text{C}$  and  $\text{CH}_3\text{Li}$  in  $\text{Et}_2\text{O}$  (1.2 M, 7.5 mL, 10 mmol) was added at -95  $^\circ\text{C}$  and stirred for 2 h at -95  $^\circ\text{C}$ . After the TLC analysis indicated the completion of reaction, the reaction was quenched with sat.  $\text{NH}_4\text{Cl}$  aq. (10 mL) and the mixture was poured to water (50 mL) and extracted with EtOAc (20 mL x 3). The organic layer was washed with brine (50 mL), dried over  $\text{Na}_2\text{SO}_4$ , filtrated and concentrated *in vacuo*. The residue was purified by flash column chromatography (silica gel 30 g, hexane/EtOAc = 19/1  $\rightarrow$  4/1, v/v), which gave the title compound **2** (3.6 g, 74%) as a yellow oil.  $R_f$  = 0.53 (hexane/EtOAc = 3/1, v/v);  $[\alpha]_D^{20}$  = +35.6 (*c* 2.6,  $\text{CHCl}_3$ );  $^1\text{H}$  NMR (400 MHz,  $\text{CDCl}_3$ , TMS)  $\delta$  7.38-7.31 (m, 5H, Ar-H), 5.98-5.88 (m, 1H,  $\text{H}_\beta$ ), 5.32 (dd,  $J_{\gamma\text{trans},\gamma\text{cis}}$  = 1.6 Hz,  $J_{\gamma\text{trans},\beta}$  = 17.2 Hz, 1H,  $\text{H}_{\gamma\text{trans}}$ ), 5.25 (dd,  $J_{\gamma\text{cis},\gamma\text{trans}}$  = 1.6 Hz,  $J_{\gamma\text{cis},\beta}$  = 10.4 Hz, 1H,  $\text{H}_{\gamma\text{cis}}$ ), 4.96 (d,  $J_{1,2}$  = 2.1 Hz, 1H, H-1), 4.63 & 4.57 (ABq,  $J$  = 11.2 Hz, 2H,  $\text{PhCH}_2$ ), 4.46 (d,  $J_{4,5}$  = 8.8 Hz, 1H, H-5), 4.30 (dd,  $J_{\alpha,\alpha}$  = 12.0 Hz,  $J_{\alpha,\beta}$  = 4.8 Hz, 1H,  $\text{H}_\alpha$ ), 4.14 (dd,  $J_{4,5}$  = 8.4 Hz,  $J_{3,4}$  = 8.4 Hz, 1H, H-4), 4.07 (d,  $J_{7,7}$  = 11.2 Hz, 1H, H-7), 4.06 (dd,  $J_{\alpha,\alpha}$  = 12.0 Hz,  $J_{\alpha,\beta}$  = 4.8 Hz, 1H,  $\text{H}_\alpha$ ), 3.97 (m, 1H, H-2), 3.96 (d,  $J_{7,7}$  = 11.2 Hz, 1H, H-7), 3.70 (dd,  $J_{3,4}$  = 8.4 Hz,  $J_{2,3}$  = 3.2 Hz, 1H, H-3), 0.85 (s, 9H,  $\text{C}(\text{CH}_3)_3$ ), 0.04 (s, 3H,  $\text{Si}(\text{CH}_3)_2$ ), 0.01 (s, 3H,  $\text{Si}(\text{CH}_3)_2$ );  $^{13}\text{C}$  NMR (100 MHz,  $\text{CDCl}_3$ ,

TMS)  $\delta$  198.4, 137.6, 133.5, 128.6, 128.1, 127.9, 118.2, 98.9, 80.1, 74.2, 71.8, 68.9, 68.4, 67.5, 26.0, 18.2, 5.0, -4.0, -4.6; HRMS (ESI) Calcd for  $C_{23}H_{35}O_6ISiNa$   $[M+Na]^+$ : 585.1139, found: 585.1163.

#### Allyl 7-*O*-acetyl-3-*O*-benzyl-4-*O*-*tert*-butyldimethylsilyl-6-oxo- $\alpha$ -D-manno-heptopyranoside (**3**)

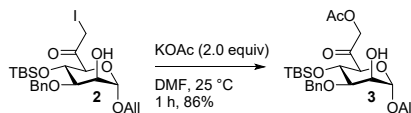

Under Ar atmosphere, to a solution of **2** (5.1 g, 9.1 mmol) in anhydrous DMF (18 mL) was added KOAc (1.8 g, 18 mmol) at 25 °C and stirred for 1 h at 25 °C. After the TLC analysis indicated the completion of reaction, the mixture was poured to water (50 mL) and extracted with EtOAc (20 mL x 3). The organic layer was washed with brine (50 mL), dried over  $Na_2SO_4$ , filtrated and concentrated *in vacuo*. The residue was purified by flash column chromatography (silica gel 25 g, hexane/EtOAc = 9/1  $\rightarrow$  7/3, v/v), which gave the title compound **3** (3.8 g, 86%) as a yellow oil.  $R_f$  = 0.38 (hexane/EtOAc = 4/1, v/v);  $[\alpha]_D^{20}$  = +31.0 (*c* 3.3,  $CHCl_3$ );  $^1H$  NMR (400 MHz,  $CDCl_3$ , TMS)  $\delta$  7.27-7.21 (m, 5H, Ar-H), 5.85-5.75 (m, 1H,  $H_\beta$ ), 5.20 (dddd,  $J_{\gamma trans,\beta}$  = 17.6 Hz,  $J_{\gamma trans,\gamma cis}$  = 1.7 Hz,  $J_{\gamma trans,\alpha}$  = 1.7 Hz,  $J_{\gamma trans,\alpha}$  = 1.7 Hz, 1H,  $H_{\gamma trans}$ ), 5.14 (dddd,  $J_{\gamma cis,\beta}$  = 10.4 Hz,  $J_{\gamma cis,\gamma trans}$  = 1.7 Hz,  $J_{\gamma cis,\alpha}$  = 1.7 Hz,  $J_{\gamma cis,\alpha}$  = 1.7 Hz, 1H,  $H_{\gamma cis}$ ), 4.85 (s, 2H, H-7), 4.84 (d,  $J_{1,2}$  = 2.4 Hz, 1H, H-1), 4.53 & 4.46 (ABq,  $J$  = 11.6 Hz, 2H,  $PhCH_2$ ), 4.11 (dddd,  $J_{\alpha,\alpha}$  = 12.9 Hz,  $J_{\alpha,\beta}$  = 5.2 Hz,  $J_{\alpha,\gamma}$  = 1.5 Hz,  $J_{\alpha,\gamma}$  = 1.5 Hz, 1H,  $H_\alpha$ ), 4.04-4.03 (m, 2H, H-4&H-5), 3.92 (dddd,  $J_{\alpha,\alpha}$  = 12.9 Hz,  $J_{\alpha,\beta}$  = 6.1 Hz,  $J_{\alpha,\gamma}$  = 1.2 Hz,  $J_{\alpha,\gamma}$  = 1.2 Hz, 1H,  $H_\alpha$ ), 3.86 (m, 1H, H-2), 3.60-3.57 (m, 1H, H-3), 2.06 (s, 3H,  $CH_3$ ), 0.74 (s, 9H,  $C(CH_3)_3$ ), -0.05 (s, 3H,  $Si(CH_3)_3$ ), -0.09 (s, 3H,  $Si(CH_3)_3$ );  $^{13}C$  NMR (100 MHz,  $CDCl_3$ , TMS)  $\delta$  199.1, 170.1, 137.6, 133.4, 128.6, 128.0, 127.9, 118.0, 98.8, 79.9, 76.2, 71.8, 68.9, 67.8, 67.5, 66.4, 25.9, 20.5, 18.1, -4.1, -4.9; HRMS (ESI) Calcd for  $C_{25}H_{38}O_8SiNa$   $[M+Na]^+$ : 517.2228, found: 517.2236.

#### Allyl 7-*O*-acetyl-3-*O*-benzyl-4-*O*-*tert*-butyldimethylsilyl- $\alpha$ -D-glycero-D-manno-heptopyranoside (**4**)

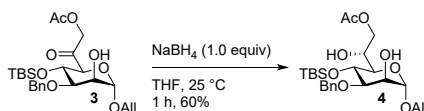

Under Ar atmosphere, to a solution of **3** (1.1 g, 2.2 mmol) in anhydrous THF (11 mL) was added  $NaBH_4$  (85 mg, 2.2 mmol) at 0 °C and warmed to 25 °C. After stirring for 1 h, the mixture was poured to water (20 mL) and extracted with EtOAc (10 mL x 3). The organic layer was washed with brine (20 mL), dried over  $Na_2SO_4$ , filtrated and concentrated *in vacuo*. The residue was purified by column chromatography (silica gel 10 g, hexane/EtOAc = 2/1, v/v), which gave the title compound **4** (0.66 g, 60%) as a colorless viscous syrup.  $R_f$  = 0.28 (hexane/EtOAc = 2/1, v/v);  $[\alpha]_D^{20}$  = +52.2 (*c* 1.5,  $CHCl_3$ );  $^1H$  NMR (400 MHz,  $CDCl_3$ , TMS)  $\delta$  7.35-7.31 (m, 5H, Ar-H), 5.94-5.84 (m, 1H,  $H_\beta$ ), 5.28

(dddd,  $J_{\gamma \text{ trans},\beta} = 17.6$  Hz,  $J_{\gamma \text{ trans},\gamma \text{ cis}} = 1.6$  Hz,  $J_{\gamma \text{ trans},\alpha} = 1.6$  Hz,  $J_{\gamma \text{ trans},\alpha} = 1.6$  Hz, 1H,  $H_{\gamma \text{ trans}}$ ), 5.20 (dddd,  $J_{\gamma \text{ cis},\beta} = 10.4$  Hz,  $J_{\gamma \text{ cis},\gamma \text{ trans}} = 1.3$  Hz,  $J_{\gamma \text{ cis},\alpha} = 1.3$  Hz,  $J_{\gamma \text{ cis},\alpha} = 1.3$  Hz, 1H,  $H_{\gamma \text{ cis}}$ ), 4.85 (d,  $J_{1,2} = 1.6$  Hz, 1H, H-1), 4.57 (s, 2H, PhCH<sub>2</sub>), 4.34-4.24 (m, 2H, H-7), 4.19 (dddd,  $J_{\alpha,\alpha} = 12.8$  Hz,  $J_{\alpha,\beta} = 3.4$  Hz,  $J_{\alpha,\gamma} = 1.2$  Hz,  $J_{\alpha,\gamma} = 1.2$  Hz, 1H,  $H_{\alpha}$ ), 4.12 (m, 1H, H-6), 3.98 (m, 1H, H-2), 3.96 (dddd,  $J_{\alpha,\alpha} = 12.8$  Hz,  $J_{\alpha,\beta} = 6.4$  Hz,  $J_{\alpha,\gamma} = 1.2$  Hz,  $J_{\alpha,\gamma} = 1.2$  Hz, 1H,  $H_{\alpha}$ ), 3.88 (dd,  $J_{4,5} = 8.7$  Hz,  $J_{3,4} = 8.7$  Hz, 1H, H-4), 3.78 (dd,  $J_{4,5} = 8.7$  Hz,  $J_{5,6} = 4.4$  Hz, 1H, H-5), 3.65 (dd,  $J_{3,4} = 8.7$  Hz,  $J_{2,3} = 3.2$  Hz, 1H, H-3), 2.82 (d,  $J = 5.7$  Hz, 1H, OH), 2.45 (s, 1H, OH), 2.06 (s, 3H, CH<sub>3</sub>), 0.86 (s, 9H, C(CH<sub>3</sub>)<sub>3</sub>), 0.08 (s, 3H, Si(CH<sub>3</sub>)), 0.05 (s, 3H, Si(CH<sub>3</sub>)); <sup>13</sup>C NMR (100 MHz, CDCl<sub>3</sub>, TMS)  $\delta$  171.4, 137.6, 133.6, 128.6, 128.0, 127.8, 117.7, 98.4, 80.5, 73.2, 71.3, 70.0, 69.5, 68.2, 67.6, 64.9, 26.0, 21.0, 18.3, -3.5, -4.7; HRMS (ESI) Calcd for C<sub>25</sub>H<sub>40</sub>O<sub>8</sub>SiNa [M+Na]<sup>+</sup>: 519.2384, found: 519.2360.

#### Allyl 7-*O*-acetyl-3-*O*-benzyl- $\alpha$ -D-glycero-D-manno-heptopyranoside (**5**)

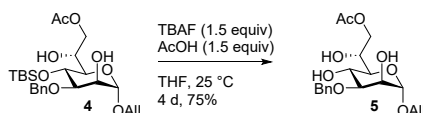

Under Ar atmosphere, to a solution of **4** (0.17 g, 0.33 mmol) in anhydrous THF (1.5 mL) was added AcOH (28  $\mu$ L, 0.49 mmol) and TBAF in THF (0.49 mL, 0.49 mmol) at 25 °C. After stirring for 4 days, the mixture was concentrated *in vacuo*. The residue was purified by column chromatography (silica gel 3 g, hexane/EtOAc = 1/1  $\rightarrow$  1/2, v/v), which gave the title compound **5** (95 mg, 75%) as a colorless viscous syrup.  $R_f = 0.12$  (hexane/EtOAc = 1/1, v/v);  $[\alpha]^{20}_D = +54.3$  ( $c$  0.6, CHCl<sub>3</sub>); <sup>1</sup>H NMR (400 MHz, CDCl<sub>3</sub>, TMS)  $\delta$  7.38-7.35 (m, 5H, Ar-H), 5.93-5.83 (m, 1H,  $H_{\beta}$ ), 5.28 (dddd,  $J_{\gamma \text{ trans},\beta} = 17.2$  Hz,  $J_{\gamma \text{ trans},\gamma \text{ cis}} = 1.6$  Hz,  $J_{\gamma \text{ trans},\alpha} = 1.6$  Hz,  $J_{\gamma \text{ trans},\alpha} = 1.6$  Hz, 1H,  $H_{\gamma \text{ trans}}$ ), 5.22 (dddd,  $J_{\gamma \text{ cis},\beta} = 10.4$  Hz,  $J_{\gamma \text{ cis},\gamma \text{ trans}} = 1.2$  Hz,  $J_{\gamma \text{ cis},\alpha} = 1.2$  Hz,  $J_{\gamma \text{ cis},\alpha} = 1.2$  Hz, 1H,  $H_{\gamma \text{ cis}}$ ), 4.89 (d,  $J_{1,2} = 1.2$  Hz, 1H, H-1), 4.72 & 4.67 (ABq,  $J = 11.3$  Hz, 2H, PhCH<sub>2</sub>), 4.39 (dd,  $J_{7,7} = 12.0$  Hz,  $J_{6,7} = 2.8$  Hz, 1H, H-7), 4.37 (dd,  $J_{7,7} = 12.0$  Hz,  $J_{6,7} = 5.6$  Hz, 1H, H-7), 4.17 (dddd,  $J_{\alpha,\alpha} = 12.8$  Hz,  $J_{\alpha,\beta} = 5.0$  Hz,  $J_{\alpha,\gamma} = 1.6$  Hz,  $J_{\alpha,\gamma} = 1.6$  Hz, 1H,  $H_{\alpha}$ ), 4.11-4.07 (m, 1H, H-6), 4.04-4.01 (m, 2H, H-2&H-5), 3.96 (dddd,  $J_{\alpha,\alpha} = 13.2$  Hz,  $J_{\alpha,\beta} = 6.4$  Hz,  $J_{\alpha,\gamma} = 1.6$  Hz,  $J_{\alpha,\gamma} = 1.6$  Hz, 1H,  $H_{\alpha}$ ), 3.74 (dd,  $J_{3,4} = 9.4$  Hz,  $J_{2,3} = 3.6$  Hz, 1H, H-3), 3.65 (dd,  $J_{4,5} = 9.4$  Hz,  $J_{3,4} = 9.4$  Hz, 1H, H-4), 3.36 (d,  $J = 3.6$  Hz, 1H, OH), 3.05 (d,  $J = 2.0$  Hz, 1H, OH), 2.40 (d,  $J = 2.4$  Hz, 1H, OH); <sup>13</sup>C NMR (100 MHz, CDCl<sub>3</sub>, TMS)  $\delta$  171.6, 137.7, 133.5, 128.6, 128.2, 128.1, 117.6, 98.6, 79.5, 72.7, 72.4, 70.2, 68.7, 68.1, 67.9, 65.7, 21.0; HRMS (ESI) Calcd for C<sub>19</sub>H<sub>26</sub>O<sub>8</sub>Na [M+Na]<sup>+</sup>: 405.1519, found: 405.1522.

#### Allyl 7-*O*-acetyl-3-*O*-benzyl-4,6-*O*-benzylidene- $\alpha$ -D-glycero-D-manno-heptopyranoside (**6**)

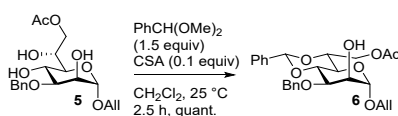

Under Ar atmosphere, to a solution of **5** (95 mg, 0.25 mmol) in anhydrous CH<sub>2</sub>Cl<sub>2</sub> (1.0 mL) was added PhCH(OMe)<sub>2</sub> (56 μL, 0.37 mmol) and CSA (5.8 mg, 25 μmol) at 25 °C. Then the mixture was stirred for 2.5 h. After the TLC analysis indicated the completion of reaction, the reaction was quenched with Et<sub>3</sub>N (0.1 mL) and the mixture was poured to water (5 mL) and extracted with CH<sub>2</sub>Cl<sub>2</sub> (5 mL x 3). The organic layer was washed with brine (10 mL), dried over Na<sub>2</sub>SO<sub>4</sub>, filtrated and concentrated *in vacuo*. The residue was purified by column chromatography (silica gel 6 g, hexane/EtOAc = 2/1, v/v), which gave the title compound **6** (0.11 g, quant.) as a white foam. *R<sub>f</sub>* = 0.52 (hexane/EtOAc = 1/1, v/v); [α]<sub>D</sub><sup>20</sup> = +56.7 (*c* 3.3, CHCl<sub>3</sub>); <sup>1</sup>H NMR (400 MHz, CDCl<sub>3</sub>, TMS) δ 7.53-7.50 (m, 10H, Ar-H), 5.93-5.83 (m, 1H, H<sub>β</sub>), 5.72 (s, 1H, PhCH), 5.28 (dd, *J<sub>γ trans,β</sub>* = 17.2 Hz, *J<sub>γ trans,γ cis</sub>* = 1.6 Hz, 1H, H<sub>γ trans</sub>), 5.22 (dd, *J<sub>γ cis,β</sub>* = 10.4 Hz, *J<sub>γ cis,γ trans</sub>* = 1.6 Hz, 1H, H<sub>γ cis</sub>), 4.89 (d, *J<sub>1,2</sub>* = 1.1 Hz, 1H, H-1), 4.86 & 4.71 (ABq, *J* = 12.0 Hz, 2H, ArCH<sub>2</sub>), 4.45 (dd, *J<sub>7,7</sub>* = 12.0 Hz, *J<sub>6,7</sub>* = 3.2 Hz, 1H, H-7), 4.26 (dd, *J<sub>7,7</sub>* = 12.0 Hz, *J<sub>6,7</sub>* = 5.4 Hz, 1H, H-7), 4.15 (dd, *J<sub>3,4</sub>* = 9.6 Hz, *J<sub>4,5</sub>* = 9.6 Hz, 1H, H-4), 4.14-4.07 (m, 2H, H-6 & H<sub>α</sub>), 4.02 (dd, *J<sub>1,2</sub>* = 1.1 Hz, *J<sub>2,3</sub>* = 3.2 Hz, 1H, H-2), 3.97-3.92 (m, 1H, H<sub>α</sub>), 3.95 (dd, *J<sub>2,3</sub>* = 3.2 Hz, *J<sub>3,4</sub>* = 9.6 Hz, 1H, H-3), 3.74 (dd, *J<sub>4,5</sub>* = 9.6 Hz, *J<sub>5,6</sub>* = 9.6 Hz, 1H, H-5), 2.88 (s, 1H, OH), 2.06 (s, 3H, CH<sub>3</sub>); <sup>13</sup>C NMR (100 MHz, CDCl<sub>3</sub>, TMS) δ 170.9, 138.0, 137.3, 133.3, 129.0, 128.5, 128.3, 128.0, 127.9, 126.2, 117.8, 101.2, 99.1, 78.0, 77.5, 77.1, 76.8, 75.8, 73.2, 69.9, 68.0, 64.0, 62.9, 20.9; HRMS (ESI) Calcd for C<sub>26</sub>H<sub>30</sub>O<sub>8</sub>Na [M+Na]<sup>+</sup>:493.1832, found: 493.1819.

#### Allyl 2,3-*O*-dibenzyl-4,6-*O*-benzylidene- $\alpha$ -D-glycero-D-manno-heptopyranoside (**7**)

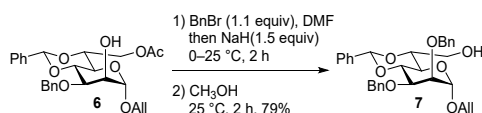

Under Ar atmosphere, to a solution of **6** (68 mg, 0.14 mmol) in anhydrous DMF (1.0 mL) was added BnBr (19 μL, 0.16 mmol) at 0 °C and stirred for 10 min. Then NaH (9.1 mg, 0.21 mmol, purity 55%) was added at 0 °C and warmed to 25 °C and stirred for 2 h at 25 °C. After the TLC analysis indicated the completion of reaction, the reaction was quenched with MeOH (0.5 mL). After stirring for 2 h, the mixture was poured to water (10 mL) and extracted with EtOAc (5 mL x 3). The organic layer was washed with brine (10 mL), dried over Na<sub>2</sub>SO<sub>4</sub>, filtrated and concentrated *in vacuo*. The residue was purified by column chromatography (silica gel 5 g, hexane/EtOAc = 2/1, v/v), which gave the title compound **7** (57 mg, 79%) as a colorless viscous syrup. *R<sub>f</sub>* = 0.33 (hexane/EtOAc = 3/1, v/v); [α]<sub>D</sub><sup>20</sup> = +53.3 (*c* 0.8, CHCl<sub>3</sub>); <sup>1</sup>H NMR (400 MHz, CDCl<sub>3</sub>, TMS) δ 7.52-7.50 (m, 2H, Ar-H), 7.40-7.26 (m, 13H, Ar-H), 5.89-5.79 (m, 1H, H<sub>β</sub>), 5.76 (s, 1H, PhCH), 5.22 (dddd, *J<sub>γ trans,β</sub>* = 17.2 Hz, *J<sub>γ trans,γ cis</sub>* = 1.6 Hz, *J<sub>γ trans,α</sub>* = 1.6 Hz, *J<sub>γ trans,α</sub>* = 1.6 Hz, 1H, H<sub>γ trans</sub>), 5.17 (dddd, *J<sub>γ cis,β</sub>* = 11.6 Hz, *J<sub>γ cis,γ trans</sub>* = 1.3 Hz, *J<sub>γ cis,α</sub>* = 1.3 Hz, *J<sub>γ cis,α</sub>* = 1.3 Hz, 1H, H<sub>γ cis</sub>), 4.85 (d, *J<sub>1,2</sub>* = 1.6 Hz, 1H, H-1), 4.82 & 4.73 (ABq, *J* = 12.2 Hz, 2H, ArCH<sub>2</sub>), 4.81 & 4.65 (ABq, *J* = 12.2 Hz, 2H, ArCH<sub>2</sub>), 4.29 (dd, *J<sub>3,4</sub>* = 9.6 Hz, *J<sub>4,5</sub>* = 9.6 Hz, 1H, H-4), 4.14 (dddd, *J<sub>α,α</sub>* = 12.8 Hz, *J<sub>α,β</sub>* = 5.2 Hz, *J<sub>α,γ</sub>* = 1.4 Hz, *J<sub>α,γ</sub>* = 1.4 Hz, 1H, H<sub>α</sub>), 4.01-3.97

(m, 1H, H-6), 3.98 (dd,  $J_{2,3} = 3.2$  Hz,  $J_{3,4} = 9.6$  Hz, 1H, H-3), 3.95-3.91 (m, 1H, H-7), 3.92 (dddd,  $J_{\alpha,\alpha} = 12.8$  Hz,  $J_{\alpha,\beta} = 6.2$  Hz,  $J_{\alpha,\gamma} = 1.3$  Hz,  $J_{\alpha,\delta} = 1.3$  Hz, 1H, H $_{\alpha}$ ), 3.86 (dd,  $J_{1,2} = 1.6$  Hz,  $J_{2,3} = 3.2$  Hz, 1H, H-2), 3.82-3.76 (m, 1H, H-7), 3.75 (dd,  $J_{4,5} = 9.6$  Hz,  $J_{5,6} = 9.6$  Hz, 1H, H-5), 1.92 (t,  $J = 6.6$  Hz, 1H, OH);  $^{13}\text{C}$  NMR (100 MHz,  $\text{CDCl}_3$ , TMS)  $\delta$  138.7, 138.1, 137.5, 133.4, 129.0, 128.4, 128.3, 128.28, 128.20, 127.8, 127.6, 127.5, 126.2, 117.8, 101.1, 98.4, 78.8, 78.1, 76.6, 76.2, 73.7, 73.2, 67.9, 64.6, 62.0; HRMS (ESI) Calcd for  $\text{C}_{31}\text{H}_{34}\text{O}_7\text{Na}$   $[\text{M}+\text{Na}]^+$ : 541.2196, found: 541.2194.

**(Allyl 2,3-*O*-dibenzyl-4,6-*O*-benzylidene- $\alpha$ -D-glycero-D-manno-heptopyranoside)-7-yl *o*-xylenyl phosphate (8)**

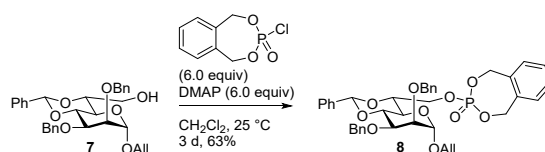

Under Ar atmosphere, to a solution of **7** (40 mg, 77  $\mu\text{mol}$ ) in anhydrous  $\text{CH}_2\text{Cl}_2$  (1.5 mL) were added XylPOCl (0.10 g, 0.46 mmol) and DMAP (56 mg, 0.46 mmol) at 25  $^\circ\text{C}$ . After stirring for 3 days, the mixture was poured to water (5 mL) and extracted with  $\text{CH}_2\text{Cl}_2$  (5 mL x 3). The organic layer was washed with brine (10 mL), dried over  $\text{Na}_2\text{SO}_4$ , filtrated and concentrated *in vacuo*. The residue was purified by column chromatography (silica gel 7 g, hexane/EtOAc = 2/1  $\rightarrow$  1/1, v/v), which gave the title compound **8** (34 mg, 63%) as a white foam and **7** was recovered (13 mg, 32%).  $R_f = 0.40$  (hexane/EtOAc = 1/1, v/v);  $[\alpha]^{20}_{\text{D}} = +20.6$  ( $c$  0.2,  $\text{CHCl}_3$ );  $^1\text{H}$  NMR (400 MHz,  $\text{CDCl}_3$ , TMS)  $\delta$  7.50-7.48 (m, 2H, Ar-H), 7.38-7.26 (m, 16H, Ar-H), 7.23-7.17 (m, 1H, Ar-H), 5.86-5.77 (m, 1H, H $_{\beta}$ ), 5.77 (s, 1H, PhCH), 5.29-5.11 (m, 2H, ArCH $_2$ ), 5.07-4.89 (m, 2H, ArCH $_2$ ), 5.22 (d,  $J_{\gamma\text{ cis},\beta} = 17.6$  Hz, 1H, H $_{\gamma\text{ trans}}$ ), 5.14 (d,  $J_{\gamma\text{ cis},\beta} = 10.8$  Hz, 1H, H $_{\gamma\text{ cis}}$ ), 4.85 (s, 1H, H-1), 4.82 & 4.73 (ABq,  $J = 12.0$  Hz, 2H, ArCH $_2$ ), 4.81 & 4.64 (ABq,  $J = 12.0$  Hz, 2H, ArCH $_2$ ), 4.50 (ddd,  $J_{6,7} = 6.0$  Hz,  $J_{7,7} = 12.8$  Hz,  $J_{\text{H,P}} = 1.6$  Hz, 1H, H-7), 4.40 (dd,  $J_{6,7} = 5.6$  Hz,  $J_{7,7} = 12.8$  Hz, 1H, H-7), 4.31 (dd,  $J_{3,4} = 9.6$  Hz,  $J_{4,5} = 9.6$  Hz, 1H, H-4), 4.18-4.13 (m, 2H, H-6 & H $_{\alpha}$ ), 3.99 (dd,  $J_{2,3} = 3.2$  Hz,  $J_{3,4} = 9.6$  Hz, 1H, H-3), 3.92 (dd,  $J_{\alpha,\alpha} = 12.8$  Hz,  $J_{\alpha,\beta} = 6.0$  Hz, 1H, H $_{\alpha}$ ), 3.86 (dd,  $J_{1,2} = 1.2$  Hz,  $J_{2,3} = 3.2$  Hz, 1H, H-2), 3.75 (dd,  $J_{4,5} = 9.6$  Hz,  $J_{5,6} = 9.6$  Hz, 1H, H-5);  $^{13}\text{C}$  NMR (100 MHz,  $\text{CDCl}_3$ , TMS)  $\delta$  138.6, 138.0, 137.4, 135.5, 135.3, 133.3, 129.2, 129.1, 129.0, 128.9, 128.5, 128.3, 128.2, 128.1, 127.9, 127.6, 127.5, 126.1, 117.5, 101.0, 98.4, 78.2, 77.3, 77.2, 77.1, 76.5, 76.2, 73.7, 73.2, 68.7, 68.0, 65.8, 64.1;  $^{31}\text{P}$  NMR (161 MHz,  $\text{CDCl}_3$ )  $\delta$  -0.7; HRMS (ESI) Calcd for  $\text{C}_{39}\text{H}_{41}\text{O}_{10}\text{PNa}$   $[\text{M}+\text{Na}]^+$ : 723.2329, found: 723.2312.

**(2,3-*O*-dibenzyl-4,6-*O*-benzylidene- $\alpha$ -D-glycero-D-manno-heptopyranoside)-7-yl-*o*-xylenyl phosphate (9)**

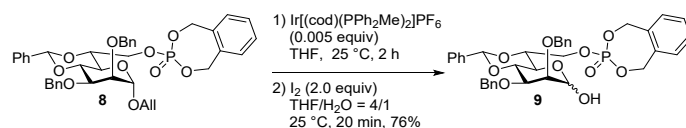

Under Ar atmosphere, to Ir[(cod)(PPh<sub>2</sub>Me)<sub>2</sub>]PF<sub>6</sub> (0.20 mg, 0.21  $\mu$ mol) was added anhydrous THF (0.50 mL) at 25 °C. The mixture was degassed under sonication, and the atmosphere was replaced with H<sub>2</sub> at the temperature. After observing the color change of the solution from yellow to colorless, the atmosphere was replaced with Ar. The solution was then transferred to a solution of **8** (29 mg, 42  $\mu$ mol) in anhydrous THF (0.50 mL), and the mixture was stirred for 2 h, before being concentrated *in vacuo*. Upon confirmation of complete migration of the double bond *via* <sup>1</sup>H NMR spectroscopy, the mixture was diluted with THF/H<sub>2</sub>O = 4/1 (0.50 mL) and I<sub>2</sub> (21 mg, 83  $\mu$ mol) was added. After stirring for 20 min, the TLC analysis indicated the completion of reaction. The reaction was quenched with 10% Na<sub>2</sub>S<sub>2</sub>O<sub>3</sub> aq. (2 mL) and the mixture was poured to water (5 mL) and extracted with EtOAc (2 mL x 3). The organic layer was washed with brine (5 mL), dried over Na<sub>2</sub>SO<sub>4</sub>, filtrated and concentrated *in vacuo*. The residue was purified by column chromatography (silica gel 4 g, CH<sub>3</sub>Cl/EtOAc = 9/1, v/v), yielding the title compound **9** (21 mg, 76%) as a white foam. R<sub>f</sub> = 0.25 (hexane/EtOAc = 1/2, v/v); [ $\alpha$ ]<sup>20</sup><sub>D</sub> = -3.0 (*c* 0.4, CHCl<sub>3</sub>); <sup>1</sup>H NMR (400 MHz, CDCl<sub>3</sub>, TMS)  $\delta$  7.53-7.51 (m, 2H, Ar-H), 7.39-7.25 (m, 17H, Ar-H), 5.74 (s, 1H, PhCH), 5.36-5.30 (m, 1H, ArCH<sub>2</sub>), 5.26-5.20 (m, 1H, ArCH<sub>2</sub>), 5.24 (s, 1H, H-1), 5.06-4.97 (m, 2H, ArCH<sub>2</sub>), 4.80 & 4.73 (ABq, *J* = 12.4 Hz, 2H, PhCH<sub>2</sub>), 4.79 & 4.64 (ABq, *J* = 12.2 Hz, 2H, ArCH<sub>2</sub>), 4.64-4.58 (m, 1H, H-7), 4.37-4.31 (m, 1H, H-7), 4.31 (dd, *J*<sub>3,4</sub> = 9.6 Hz, *J*<sub>4,5</sub> = 9.6 Hz, 1H, H-4), 4.12 (dd, *J*<sub>4,5</sub> = 9.6 Hz, *J*<sub>5,6</sub> = 9.6 Hz, 1H, H-5), 4.09 (dd, *J*<sub>2,3</sub> = 3.2 Hz, *J*<sub>3,4</sub> = 9.6 Hz, 1H, H-3), 4.08-4.05 (m, 1H, H-6), 3.89 (dd, *J*<sub>1,2</sub> = 1.2 Hz, *J*<sub>2,3</sub> = 3.2 Hz, 1H, H-2); <sup>13</sup>C NMR (100 MHz, CDCl<sub>3</sub>, TMS)  $\delta$  138.7, 138.2, 137.5, 135.3, 135.2, 129.4, 129.2, 129.1, 129.0, 128.4, 128.3, 128.2, 127.7, 127.59, 127.53, 126.3, 101.4, 94.5, 78.2, 77.3, 76.9, 76.8, 76.6, 76.5, 73.7, 73.1, 69.1, 68.7, 65.5, 63.0; <sup>31</sup>P NMR (161 MHz, CDCl<sub>3</sub>)  $\delta$  -1.0; HRMS (ESI) Calcd for C<sub>36</sub>H<sub>37</sub>O<sub>10</sub>PNa [M+Na]<sup>+</sup>: 683.2016, found: 683.2006.

**1-Bis(benzyloxy)phosphoryl-2,3-*O*-dibenzyl-4,6-*O*-benzylidene- $\alpha$ -D-glycero-D-manno-heptopyranos-7-yl *o*-xylenyl phosphate (11 $\alpha$ ) and 1-bis(benzyloxy)phosphoryl-2,3-*O*-dibenzyl-4,6-*O*-benzylidene- $\beta$ -D-glycero-D-manno-heptopyranos-7-yl *o*-xylenyl phosphate (11 $\beta$ )**

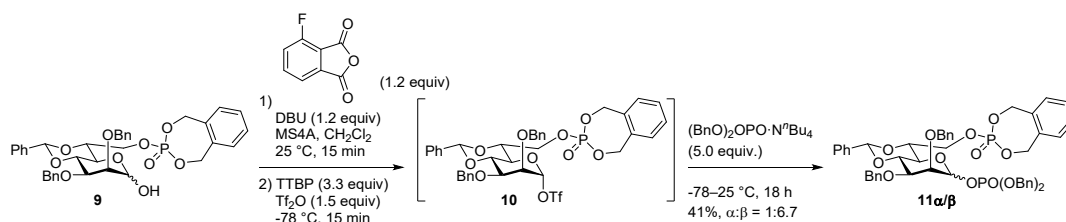

Under Ar atmosphere, to a solution of **9** (29 mg, 44  $\mu$ mol), 3-fluorophthalic anhydride (8.8 mg, 53  $\mu$ mol) and MS4A (100 mg) in anhydrous  $\text{CH}_2\text{Cl}_2$  (0.8 mL) was added DBU (7.9  $\mu$ L, 53  $\mu$ mol) at 25  $^\circ\text{C}$  and stirred for 15 min. Then TTBP (36 mg, 0.15 mmol) was added at 25  $^\circ\text{C}$  and the mixture was cooled to -78  $^\circ\text{C}$ . After that, to the mixture was added  $\text{Tf}_2\text{O}$  (11  $\mu$ L, 66  $\mu$ mol) at -78  $^\circ\text{C}$  and stirred at 15 min.  $\text{PO}(\text{OBn})_2\text{O}\cdot\text{N}^t\text{Bu}_4$  (0.11 g, 0.22 mmol) in  $\text{CH}_2\text{Cl}_2$  (0.4 mL) was added at -78  $^\circ\text{C}$  and the mixture was warmed to 25  $^\circ\text{C}$ . After the TLC analysis indicated the completion of reaction, the reaction was quenched with sat.  $\text{NaHCO}_3$  aq. (2 mL). The mixture was filtrated with celite pad, and poured to water (5 mL) and extracted with  $\text{CH}_2\text{Cl}_2$  (5 mL x 3). The organic layer was washed with brine (10 mL), dried over  $\text{Na}_2\text{SO}_4$ , filtrated and concentrated *in vacuo*. The residue was purified by column chromatography (silica gel 14 g,  $\text{CHCl}_3/\text{acetone}/\text{PhMe} = 4/1/1$ , v/v), which gave the title compound **11 $\alpha$**  (2.2 mg, 5.3%) and **11 $\beta$**  (14mg, 35%) both as white solid.

**11 $\alpha$** :  $R_f = 0.53$  ( $\text{CHCl}_3/\text{acetone}/\text{PhMe} = 4/1/1$ , v/v);  $[\alpha]_D^{20} = +21.5$  ( $c$  0.3,  $\text{CHCl}_3$ );  $^1\text{H NMR}$  (400 MHz,  $\text{CDCl}_3$ , TMS)  $\delta$  7.51-7.48 (m, 2H, Ar-H), 7.35-7.28 (m, 25H, Ar-H), 7.16-7.14 (m, 2H, Ar-H), 5.73 (s, 1H, PhCH), 5.59 (dd,  $J_{1,2} = 2.0$  Hz,  $J_{\text{H,P}} = 6.4$  Hz, 1H, H-1), 5.18 (dd,  $^2J_{\text{H,H}} = 12.5$  Hz,  $J_{\text{H,P}} = 13.5$  Hz, 1H, ArCH<sub>2</sub>), 5.14 (dd,  $^2J_{\text{H,H}} = 13.5$  Hz,  $J_{\text{H,P}} = 13.5$  Hz, 1H, ArCH<sub>2</sub>), 5.00 (dd,  $^2J_{\text{H,H}} = 13.5$  Hz,  $J_{\text{H,P}} = 9.6$  Hz, 1H, ArCH<sub>2</sub>), 4.98 (d,  $J_{\text{H,P}} = 9.6$  Hz, 2H, ArCH<sub>2</sub>), 4.95 (dd,  $^2J_{\text{H,H}} = 13.5$  Hz,  $J_{\text{H,P}} = 10.2$  Hz, 1H, ArCH<sub>2</sub>), 4.92 (d,  $J_{\text{H,P}} = 9.2$  Hz, 2H, ArCH<sub>2</sub>), 4.73 & 4.55 (ABq,  $J = 12.4$  Hz, 2H, ArCH<sub>2</sub>), 4.70 & 4.61 (ABq,  $J = 11.6$  Hz, 2H, ArCH<sub>2</sub>), 4.45 (ddd,  $J_{6,7} = 2.1$  Hz,  $J_{7,7} = 11.6$  Hz,  $J_{\text{H,P}} = 7.3$  Hz, 1H, H-7), 4.27 (dd,  $J_{3,4} = 9.6$  Hz,  $J_{4,5} = 9.6$  Hz, 1H, H-4), 4.19 (ddd,  $J_{6,7} = 6.0$  Hz,  $J_{7,7} = 11.6$  Hz,  $J_{\text{H,P}} = 6.6$  Hz, 1H, H-7), 4.15-4.10 (m, 1H, H-6), 3.83 (dd,  $J_{2,3} = 3.2$  Hz,  $J_{3,4} = 9.6$  Hz, 1H, H-3), 3.73 (d,  $J_{2,3} = 3.2$  Hz, 1H, H-2), 3.72 (dd,  $J_{4,5} = 9.6$  Hz,  $J_{5,6} = 9.6$  Hz, 1H, H-5);  $^{13}\text{C NMR}$  (100 MHz,  $\text{CDCl}_3$ , TMS)  $\delta$  □

138.3, 137.5, 137.1, 135.49, 135.43, 129.1, 129.08, 129.01, 128.9, 128.89, 128.81, 128.79, 128.73, 128.5, 128.4, 128.3, 128.19, 128.14, 128.0, 127.7, 127.5, 126.1, 101.0, 96.7, 77.2, 76.9, 76.0, 75.9, 75.1, 73.8, 73.2, 69.8, 69.7, 68.6, 66.2, 66.1;  $^{31}\text{P NMR}$  (161 MHz,  $\text{CDCl}_3$ )  $\delta$  -0.5, -2.3; HRMS (ESI) Calcd for  $\text{C}_{50}\text{H}_{50}\text{O}_{13}\text{P}_2\text{Na}$   $[\text{M}+\text{Na}]^+$ : 943.2618, found: 943.2601.

**11 $\beta$** :  $R_f = 0.48$  ( $\text{CHCl}_3/\text{acetone}/\text{PhMe} = 4/1/1$ , v/v);  $[\alpha]_D^{20} = -12.5$  ( $c$  0.2,  $\text{CHCl}_3$ );  $^1\text{H NMR}$  (400 MHz,  $\text{CDCl}_3$ , TMS)  $\delta$  7.51-7.48 (m, 2H, Ar-H), 7.38-7.27 (m, 25H, Ar-H), 7.20-7.15 (m, 2H, Ar-H), 5.71 (s, 1H, PhCH), 5.20 (d,  $J_{\text{H,P}} = 7.6$  Hz, 1H, H-1), 5.16 & 5.03 (ABq,  $J = 13.2$  Hz, 2H, ArCH<sub>2</sub>), 5.13 & 4.99 (ABq,  $J = 13.6$  Hz, 2H, ArCH<sub>2</sub>), 5.10 & 5.05 (ABq,  $J = 12.0$  Hz, 2H, ArCH<sub>2</sub>), 5.08 & 5.00 (ABq,  $J = 8.4$  Hz, 2H, ArCH<sub>2</sub>), 4.78 (s, 2H, ArCH<sub>2</sub>), 4.71 & 4.59 (ABq,  $J = 12.0$  Hz, ArCH<sub>2</sub>), 4.41 (ddd,  $J_{6,7} = 6.8$  Hz,  $J_{7,7} = 10.8$  Hz,  $J_{\text{H,P}} = 1.5$  Hz, 1H, H-7), 4.26 (m, 1H, H-7), 4.23 (dd,  $J_{3,4} = 9.6$  Hz,  $J_{4,5} = 9.6$  Hz, 1H, H-4), 4.13 (m, 1H, H-6), 3.85 (d,  $J_{2,3} = 1.6$  Hz, 1H, H-2), 3.58 (dd,  $J_{2,3} = 1.6$  Hz,  $J_{3,4} = 9.6$  Hz, 1H, H-3), 3.26 (dd,  $J_{4,5} = 9.6$  Hz,  $J_{5,6} = 9.6$  Hz, 1H, H-5);  $^{13}\text{C NMR}$  (100 MHz,  $\text{CDCl}_3$ , TMS)  $\delta$  138.0, 137.0, 135.6, 135.5, 135.4, 129.0, 128.99, 128.94, 128.74, 128.72, 128.70, 128.49, 128.41, 128.3, 128.2, 127.9, 127.86, 127.81, 127.6, 126.2, 101.1, 97.1, 77.2, 75.4, 72.9, 69.96, 69.90, 69.7, 69



.6, 68.66, 68.60, 68.0, 65.9, 65.8;  $^{31}\text{P}$  NMR (161 MHz,  $\text{CDCl}_3$ )  $\delta$  -0.1, -2.2; HRMS (ESI) Calcd for  $\text{C}_{50}\text{H}_{50}\text{O}_{13}\text{P}_2\text{Na}$   $[\text{M}+\text{Na}]^+$ : 943.2618, found: 943.2612.

### 1,7-*O*-Bisphosphoryl- $\beta$ -D-glycero-D-manno-heptopyranose (HBP)

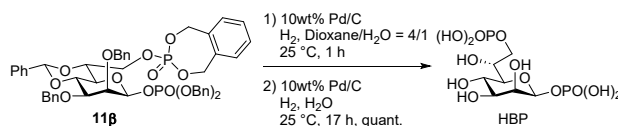

A mixture of **11β** (5.3 mg, 5.8  $\mu\text{mol}$ ) and 10% (w/w) Pd/C (2.1 mg) in 1,4-dioxane/ $\text{H}_2\text{O}$  (1.0 mL, 4:1) was stirred at 25  $^\circ\text{C}$  under  $\text{H}_2$  (1 atm). After stirring for 1 h, the mixture was filtered through celite pad. The filtrate was concentrated under reduced pressure. A mixture of **11β'** and 10% (w/w) Pd/C (2.6 mg) in  $\text{H}_2\text{O}$  (2.0 mL) was stirred at 25  $^\circ\text{C}$  under  $\text{H}_2$  (1 atm). After stirring for 17 h at this temperature, the mixture was filtered through celite pad. The filtrate was concentrated under reduced pressure, which gave the HBP (2.1 mg, quant.) as white solid.  $[\alpha]_D^{20} = +3.8$  ( $c$  0.1,  $\text{H}_2\text{O}$ );  $^1\text{H}$  NMR (400 MHz,  $\text{D}_2\text{O}$ )  $\delta$  5.12 (d,  $J_{\text{H,P}} = 8.8$  Hz, 1H, H-1), 4.19-4.15 (m, 1H, H-6), 4.10-4.04 (m, 1H, H-7), 4.01-3.92 (m, 2H, H-2 & H-7), 3.73 (dd,  $J_{3,4} = 9.6$  Hz,  $J_{4,5} = 9.6$  Hz, 1H, H-4), 3.66 (dd,  $J_{2,3} = 3.2$  Hz,  $J_{3,4} = 9.6$  Hz, 1H, H-3), 3.50 (d,  $J_{4,5} = 9.6$  Hz, 1H, H-5);  $^{13}\text{C}$  NMR (100 MHz,  $\text{D}_2\text{O}$ )  $\delta$  95.7, 76.8, 72.9, 70.9, 70.7, 67.1, 65.6;  $^{31}\text{P}$  NMR (161 MHz,  $\text{D}_2\text{O}$ )  $\delta$  4.7, 3.1; HRMS (ESI) Calcd for  $\text{C}_7\text{H}_{15}\text{O}_{13}\text{P}_2$   $[\text{M}-\text{H}]^-$ : 368.9993, found: 369.0022.

### Experiments concerning 4'

The reduction of ketone **3** yielded the desired D-glycero adduct D-**4**, isolable along with a challenging-to-isolate mixture of diastereomer L-**4** and products of acetyl migrations D/L-**4'**. Immediately post-reduction, an acetylation experiment resulted in two products, revealing acetyl group migration. The one not matching acetylated D-**4**, assumed to be L-**SI1**, was converted to L-**SI2** through deprotection, benzylidene formation, and acetylation. Indeed,  $^3J_{\text{H}_5-\text{H}_6}$  indicated a gauche conformation at 3.6 Hz. The D-**SI1**:L-**SI1** ratio confirmed the stereoselectivity of the reduction reaction as D-**4**:L-**4** = 9:1.

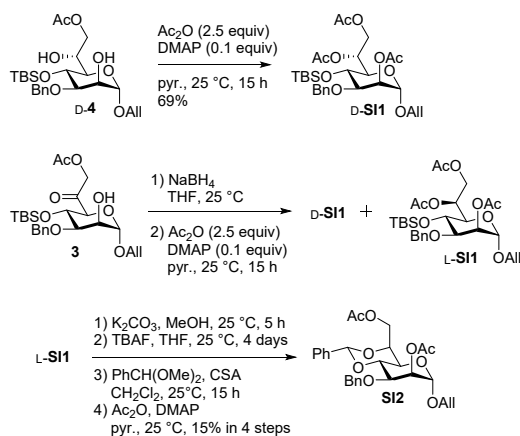

**Allyl 2,6,7-*O*-triacetyl-3-*O*-benzyl-4-*O*-*tert*-butyldimethylsilyl- $\alpha$ -D-glycero-D-manno-heptopyranoside (D-SI1)**

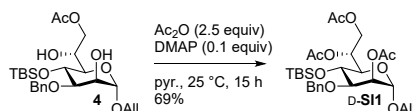

Under Ar atmosphere, to a solution of **4** (70 mg, 0.14 mmol) in anhydrous pyr. (0.70 mL) were added Ac<sub>2</sub>O (33  $\mu$ L, 0.35 mmol) and DMAP (2.0 mg, 14  $\mu$ mol) at 25 °C and stirred for 15 h. After the TLC analysis indicated the completion of reaction, the mixture was poured to water (5 mL) and extracted with EtOAc (5 mL x 3). The organic layer was washed with 10% citric acid aq. (10 mL) and brine (10 mL), dried over Na<sub>2</sub>SO<sub>4</sub>, filtrated and concentrated *in vacuo*. The residue was purified by column chromatography (silica gel 5 g, hexane/EtOAc = 3/1, v/v), which gave the title compound **D-SI1** (56 mg, 70%) as colorless syrup.  $R_f$  = 50 (hexane/EtOAc = 4/1, v/v);  $[\alpha]_D^{20}$  = +54.9 (*c* 0.3, CHCl<sub>3</sub>); <sup>1</sup>H NMR (400 MHz, CDCl<sub>3</sub>, TMS)  $\delta$  7.32-7.24 (m, 5H, Ar-H), 5.94-5.84 (m, 1H, H <sub>$\beta$</sub> ), 5.60 (ddd,  $J_{5,6}$  = 0.8 Hz,  $J_{6,7}$  = 2.8 Hz,  $J_{6,7}$  = 8.4 Hz, 1H, H-6), 5.32 (dd,  $J_{1,2}$  = 1.6 Hz,  $J_{2,3}$  = 3.2 Hz, 1H, H-2), 5.27 (dddd,  $J_{\gamma \text{ trans},\beta}$  = 17.6 Hz,  $J_{\gamma \text{ trans},\gamma \text{ cis}}$  = 1.6 Hz,  $J_{\gamma \text{ trans},\alpha}$  = 1.6 Hz,  $J_{\gamma \text{ trans},\alpha}$  = 1.6 Hz, 1H, H <sub>$\gamma$  trans</sub>), 5.22 (dddd,  $J_{\gamma \text{ cis},\beta}$  = 10.5 Hz,  $J_{\gamma \text{ cis},\gamma \text{ trans}}$  = 1.4 Hz,  $J_{\gamma \text{ cis},\alpha}$  = 1.4 Hz,  $J_{\gamma \text{ cis},\alpha}$  = 1.4 Hz, 1H, H <sub>$\gamma$  cis</sub>), 4.79 (d,  $J_{1,2}$  = 1.6 Hz, 1H, H-1), 4.63 & 4.40 (ABq,  $J$  = 11.1 Hz, 2H, ArCH<sub>2</sub>), 4.42 (dd,  $J_{6,7}$  = 2.8 Hz,  $J_{7,7}$  = 12.3 Hz, 1H, H-7), 4.29 (dd,  $J_{6,7}$  = 8.4 Hz,  $J_{7,7}$  = 12.3 Hz, 1H, H-7), 4.14 (dddd,  $J_{\alpha,\alpha}$  = 12.2 Hz,  $J_{\alpha,\beta}$  = 5.3 Hz,  $J_{\alpha,\gamma}$  = 1.8 Hz,  $J_{\alpha,\gamma}$  = 1.8 Hz, 1H, H <sub>$\alpha$</sub> ), 3.97 (dddd,  $J_{\alpha,\alpha}$  = 12.2 Hz,  $J_{\alpha,\beta}$  = 6.2 Hz,  $J_{\alpha,\gamma}$  = 1.4 Hz,  $J_{\alpha,\gamma}$  = 1.4 Hz, 1H, H <sub>$\alpha$</sub> ), 3.84 (dd,  $J_{3,4}$  = 9.7 Hz,  $J_{4,5}$  = 9.7 Hz, 1H, H-4), 3.82 (m, 1H, H-5), 3.69 (dd,  $J_{2,3}$  = 3.2 Hz,  $J_{3,4}$  = 9.7 Hz, 1H, H-3), 2.10 (s, 3H, CH<sub>3</sub>), 2.09 (s, 3H, CH<sub>3</sub>), 2.05 (s, 3H, CH<sub>3</sub>), 0.88 (s, 9H, C(CH<sub>3</sub>)<sub>3</sub>), 0.07 (s, 3H, Si(CH<sub>3</sub>)<sub>2</sub>), -0.01 (s, 3H, Si(CH<sub>3</sub>)<sub>2</sub>); <sup>13</sup>C NMR (100 MHz, CDCl<sub>3</sub>, TMS)  $\delta$  170.8, 170.2, 169.9, 137.7, 133.3, 128.2, 127.8, 127.6, 117.9, 96.8, 78.2, 73.8, 70.9, 70.4, 68.28, 68.21, 67.9, 62.1, 25.9, 21.04, 21.02, 20.8, 18.3, -3.7, -5.0; HRMS (ESI) Calcd for C<sub>29</sub>H<sub>44</sub>O<sub>10</sub>SiNa [M+Na]<sup>+</sup>:603.2595, found: 603.2604.

**Allyl 2,6,7-*O*-triacetyl-3-*O*-benzyl-4-*O*-*tert*-butyldimethylsilyl- $\alpha$ -L-glycero-D-manno-heptopyranoside (L-SI1)**

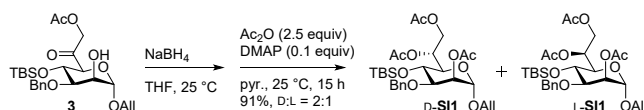

Reduction of **3** (3.3 g, 6.6 mmol) gave **4** (1.3 g, 39%) and residue (0.42 g). Under Ar atmosphere, to a solution of the residue in anhydrous pyr. (4.0 mL) were added Ac<sub>2</sub>O (0.20 mL, 2.1 mmol) and DMAP (9.7 mg, 85  $\mu$ mol) at 25 °C and stirred for 15 h. After the TLC analysis indicated the completion of reaction, the mixture was poured to water (10 mL) and extracted with EtOAc (5 mL x 3). The organic

layer was washed with 10% citric acid aq. (20 ml), brine (20 mL), dried over Na<sub>2</sub>SO<sub>4</sub>, filtrated and concentrated *in vacuo*. The residue was purified by column chromatography (silica gel 15 g, hexane/EtOAc = 4/1, v/v), which gave the title compound D-**SI1** (0.30 g, 61%) as a colorless syrup and compound L-**SI1** (0.15 g, 30%) as white solid.

L-**SI1**: R<sub>f</sub> = 0.31 (hexane/EtOAc = 4/1, v/v); [α]<sub>D</sub><sup>20</sup> = +12.1 (c 0.1, CHCl<sub>3</sub>); <sup>1</sup>H NMR (400 MHz, CDCl<sub>3</sub>, TMS) δ 7.32-7.25 (m, 5H, Ar-H), 5.92-5.82 (m, 1H, H<sub>β</sub>), 5.36 (d, J<sub>2,3</sub> = 3.2 Hz, 1H, H-2), 5.37-5.32 (m, 1H, H-6), 5.28 (dddd, J<sub>γ trans,β</sub> = 17.0 Hz, J<sub>γ trans,γ cis</sub> = 1.3 Hz, J<sub>γ trans,α</sub> = 1.3 Hz, J<sub>γ trans,α</sub> = 1.3 Hz, 1H, H<sub>γ trans</sub>), 5.22 (dddd, J<sub>γ cis,β</sub> = 10.4 Hz, J<sub>γ cis,γ trans</sub> = 1.3 Hz, J<sub>γ cis,α</sub> = 1.3 Hz, J<sub>γ cis,α</sub> = 1.3 Hz, 1H, H<sub>γ cis</sub>), 4.92 (d, J<sub>1,2</sub> = 1.7 Hz, 1H, H-1), 4.64 & 4.40 (ABq, J = 11.2 Hz, 2H, ArCH<sub>2</sub>), 4.27 (d, J<sub>6,7</sub> = 4.3, 2H, H-7), 4.14 (dddd, J<sub>α,α</sub> = 13.0 Hz, J<sub>α,β</sub> = 5.2 Hz, J<sub>α,γ</sub> = 1.2 Hz, J<sub>α,γ</sub> = 1.2 Hz, 1H, H<sub>α</sub>), 3.96 (dddd, J<sub>α,α</sub> = 13.0 Hz, J<sub>α,β</sub> = 6.4 Hz, J<sub>α,γ</sub> = 1.2 Hz, J<sub>α,γ</sub> = 1.2 Hz, 1H, H<sub>α</sub>), 3.87 (dd, J<sub>3,4</sub> = 9.2 Hz, J<sub>4,5</sub> = 9.2 Hz, 1H, H-4), 3.80-3.78 (m, 1H, H-5), 3.75 (dd, J<sub>2,3</sub> = 3.2 Hz, J<sub>3,4</sub> = 9.2 Hz, 1H, H-3), 2.12 (s, 3H, CH<sub>3</sub>), 2.10 (s, 3H, CH<sub>3</sub>), 2.04 (s, 3H, CH<sub>3</sub>), 0.84 (s, 9H, C(CH<sub>3</sub>)<sub>3</sub>), -0.02 (s, 6H, Si(CH<sub>3</sub>)<sub>2</sub>); <sup>13</sup>C NMR (100 MHz, CDCl<sub>3</sub>, TMS) δ 170.4, 170.2, 170.1, 137.7, 132.2, 128.2, 127.8, 127.6, 118.1, 96.8, 78.0, 71.0, 70.6, 68.9, 68.5, 67.6, 67.0, 61.5, 26.0, 21.04, 21.00, 20.8, 18.3, -3.3, -5.4; HRMS (ESI) Calcd for C<sub>29</sub>H<sub>44</sub>O<sub>10</sub>SiNa [M+Na]<sup>+</sup>: 603.2595, found: 603.2600.

### Allyl 2,7-diacetyl-3-*O*-benzyl-4,6-*O*-benzylidene- $\alpha$ -L-glycero-D-manno-heptopyranoside (SI2)

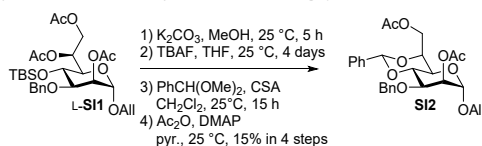

Under Ar atmosphere, to a solution of L-SI1 (89 mg, 0.15 mmol) in anhydrous MeOH (1.0 mL) was added  $K_2CO_3$  (4.2 mg, 30  $\mu$ mol) at 25 °C and stirred for 4 h. After the TLC analysis indicated the completion of reaction, the mixture was concentrated *in vacuo*, to give a yellow oily residue, which was used without further purification. Under Ar atmosphere, to a solution of the residue in anhydrous THF (0.50 mL) was added TBAF (2.0 mL, 0.20 mmol) at 25 °C and stirred for 4 days. After the TLC analysis indicated the completion of reaction, the mixture was concentrated *in vacuo*. The residue was purified by preparative thin-layer chromatography ( $CHCl_3/MeOH = 9/1$ , v/v), to give a colorless oily residue. Deprotection of TBS and acetyl groups was confirmed by  $^1H$  NMR. Under Ar atmosphere, to a solution of the residue in anhydrous  $CH_2Cl_2$  (0.50 mL) were added  $PhCH(OMe)_2$  (46  $\mu$ L, 0.31 mmol) and CSA (9.0 mg, 38  $\mu$ mol) at 25 °C and stirred for 15 h. After the TLC analysis indicated the completion of reaction, the reaction was quenched with  $Et_3N$  (0.2 mL) and the mixture was poured to water (5 mL) and extracted with  $CH_2Cl_2$  (5 mL x 3). The organic layer was washed with brine (15 mL), dried over  $Na_2SO_4$ , filtrated and concentrated *in vacuo*. The residue was purified by column chromatography (silica gel 4 g, hexane/EtOAc = 1/1, v/v), to give a colorless syrupy residue. Under Ar atmosphere, to a solution of the residue in anhydrous pyr. (0.25 mL) were added  $Ac_2O$  (7  $\mu$ L, 77  $\mu$ mol) and DMAP (0.6 mg, 5  $\mu$ mol) at 25 °C and stirred for 15 h. After the TLC analysis indicated the completion of reaction, the mixture was concentrated *in vacuo*. The residue was purified by column chromatography (silica gel 3 g, hexane/EtOAc = 3/1, v/v), which gave the title compound SI2 (12 mg, 15% in 4 steps) as colorless syrup.  $R_f = 0.38$  (hexane/EtOAc = 3/1, v/v);  $[\alpha]^{20}_D = -1.0$  (c 0.2,  $CHCl_3$ );  $^1H$  NMR (400 MHz,  $CDCl_3$ , TMS)  $\delta$  7.47-7.44 (m, 2H, Ar-H), 7.38-7.26 (m, 8H, Ar-H), 5.98 (s, 1H, PhCH), 5.94-5.84 (m, 1H,  $H_\beta$ ), 5.48 (dd,  $J_{3,4} = 9.6$  Hz,  $J_{4,5} = 9.6$  Hz, 1H, H-4), 5.37 (dd,  $J_{1,2} = 2.0$  Hz,  $J_{2,3} = 3.6$  Hz, 1H, H-2), 5.29 (dddd,  $J_{\gamma trans,\beta} = 17.6$  Hz,  $J_{\gamma trans,\gamma cis} = 1.2$  Hz,  $J_{\gamma trans,\alpha} = 1.2$  Hz,  $J_{\gamma trans,\alpha} = 1.2$  Hz, 1H,  $H_{\gamma trans}$ ), 5.24 (dddd,  $J_{\gamma cis,\beta} = 10.4$  Hz,  $J_{\gamma cis,\gamma trans} = 1.2$  Hz,  $J_{\gamma cis,\alpha} = 1.2$  Hz,  $J_{\gamma cis,\alpha} = 1.2$  Hz, 1H,  $H_{\gamma cis}$ ), 4.94 (d,  $J_{1,2} = 2.0$  Hz, 1H, H-1), 4.66 & 4.42 (ABq,  $J = 12.0$  Hz, 2H, Ar $CH_2$ ), 4.31 (ddd,  $J_{5,6} = 3.6$  Hz,  $J_{6,7} = 6.8$  Hz,  $J_{6,7} = 6.8$  Hz, 1H, H-6), 4.18 (dddd,  $J_{\alpha,\alpha} = 12.8$  Hz,  $J_{\alpha,\beta} = 5.2$  Hz,  $J_{\alpha,\gamma} = 1.6$  Hz,  $J_{\alpha,\gamma} = 1.6$  Hz, 1H,  $H_\alpha$ ), 4.13 (dd,  $J_{6,7} = 6.8$  Hz,  $J_{7,7} = 6.8$  Hz, 1H, H-7), 4.03 (dddd,  $J_{\alpha,\alpha} = 12.8$  Hz,  $J_{\alpha,\beta} = 6.0$  Hz,  $J_{\alpha,\gamma} = 1.2$  Hz,  $J_{\alpha,\gamma} = 1.2$  Hz, 1H,  $H_\alpha$ ), 3.97 (dd,  $J_{6,7} = 6.8$  Hz,  $J_{7,7} = 6.8$  Hz, 1H, H-7), 3.89 (dd,  $J_{2,3} = 3.2$  Hz,  $J_{3,4} = 9.6$  Hz, 1H, H-3), 3.76 (dd,  $J_{4,5} = 9.6$  Hz,  $J_{5,6} = 3.6$  Hz, 1H, H-5), 2.14 (s, 3H,  $CH_3$ ), 1.99 (s, 3H,  $CH_3$ );  $^{13}C$  NMR (100 MHz,  $CDCl_3$ , TMS)  $\delta$  170.5, 169.4, 138.0, 137.9, 133.2, 129.1, 128.4, 128.3, 127.7, 126.5, 117.9, 104.4, 97.0, 77.2, 74.9, 74.2, 71.2, 70.3, 68.6, 68.28, 68.21, 66.2, 21.1, 21.0; HRMS (ESI) Calcd for  $C_{28}H_{32}O_9Na$   $[M+Na]^+$ : 535.1944, found: 535.1927.

Allyl 3-O-benzyl-4-O-tert-butyl dimethylsilyl-7-deoxy-7-iodo-6-oxo- $\alpha$ -D-manno-heptopyranoside (2)  $^1\text{H}$  NMR (400 MHz,  $\text{CDCl}_3$ )

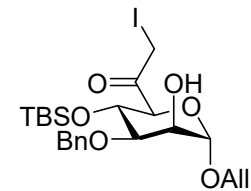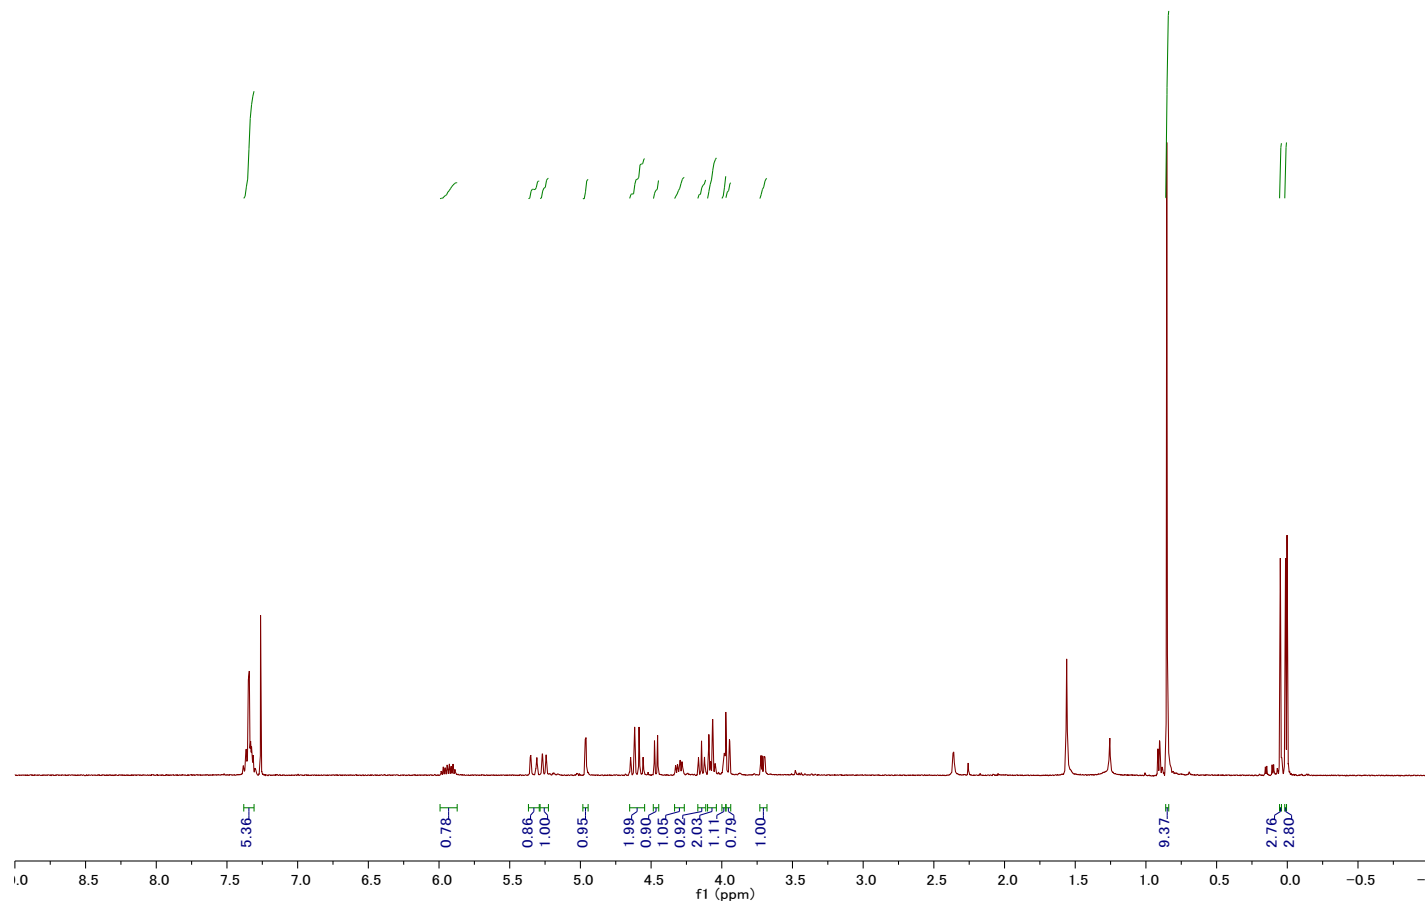

Allyl 3-*O*-benzyl-4-*O*-*tert*-butyldimethylsilyl-7-deoxy-7-iodo-6-oxo- $\alpha$ -D-*manno*-heptopyranoside (2)  $^{13}\text{C}$  NMR (100 MHz,  $\text{CDCl}_3$ )

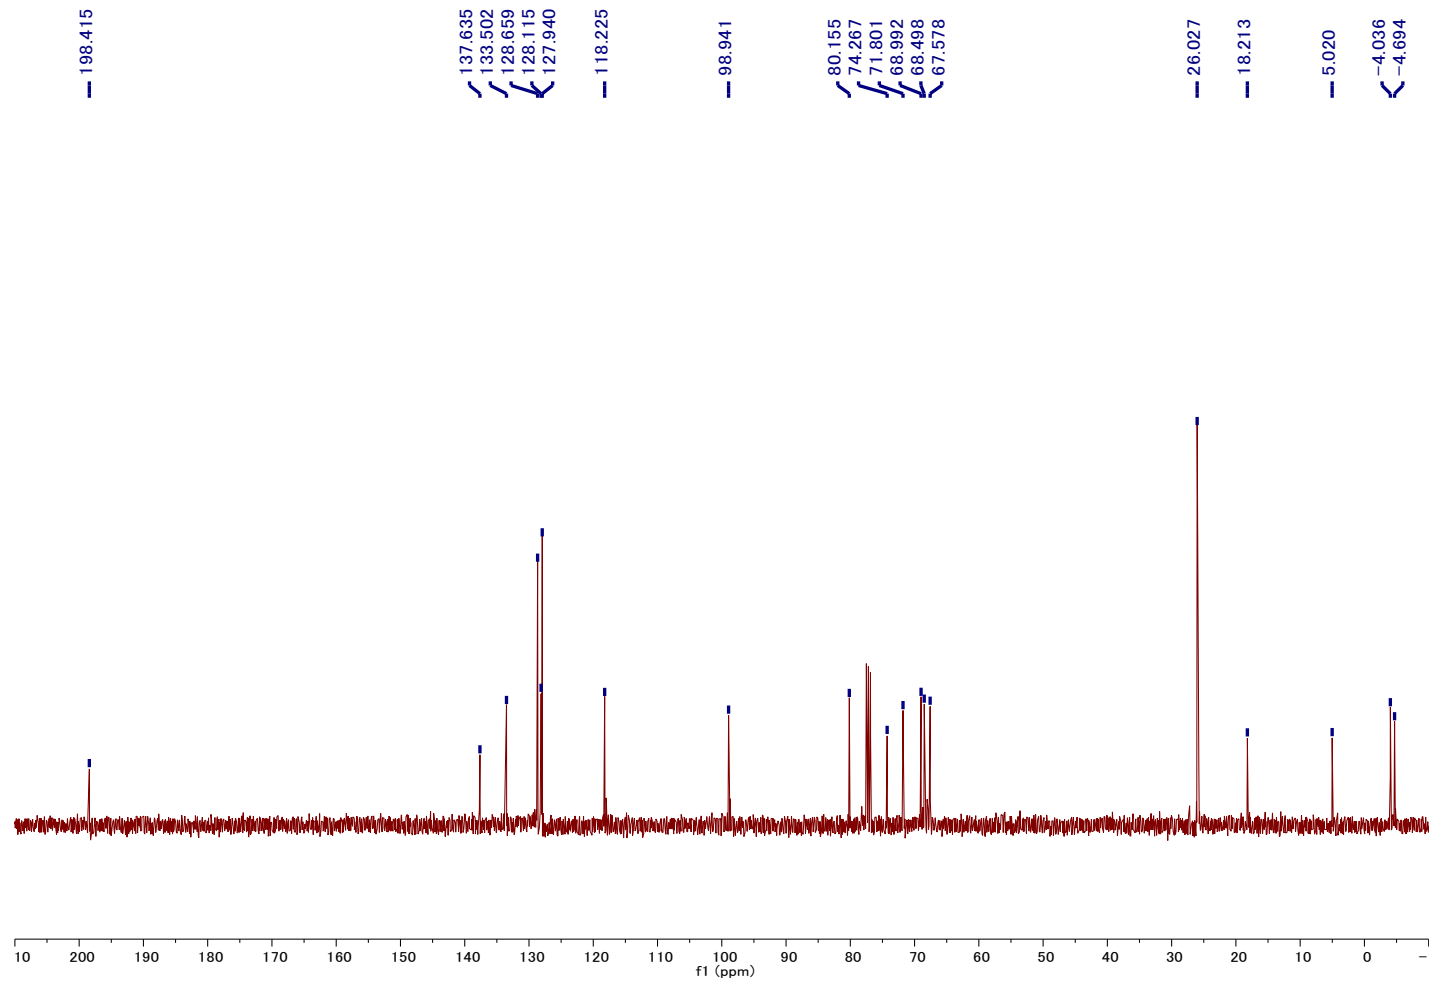

Allyl 7-O-acetyl-3-O-benzyl-4-O-tert-butylidimethylsilyl-6-oxo- $\alpha$ -D-manno-heptopyranoside (3)  $^1\text{H}$  NMR (400 MHz,  $\text{CDCl}_3$ )

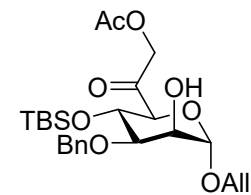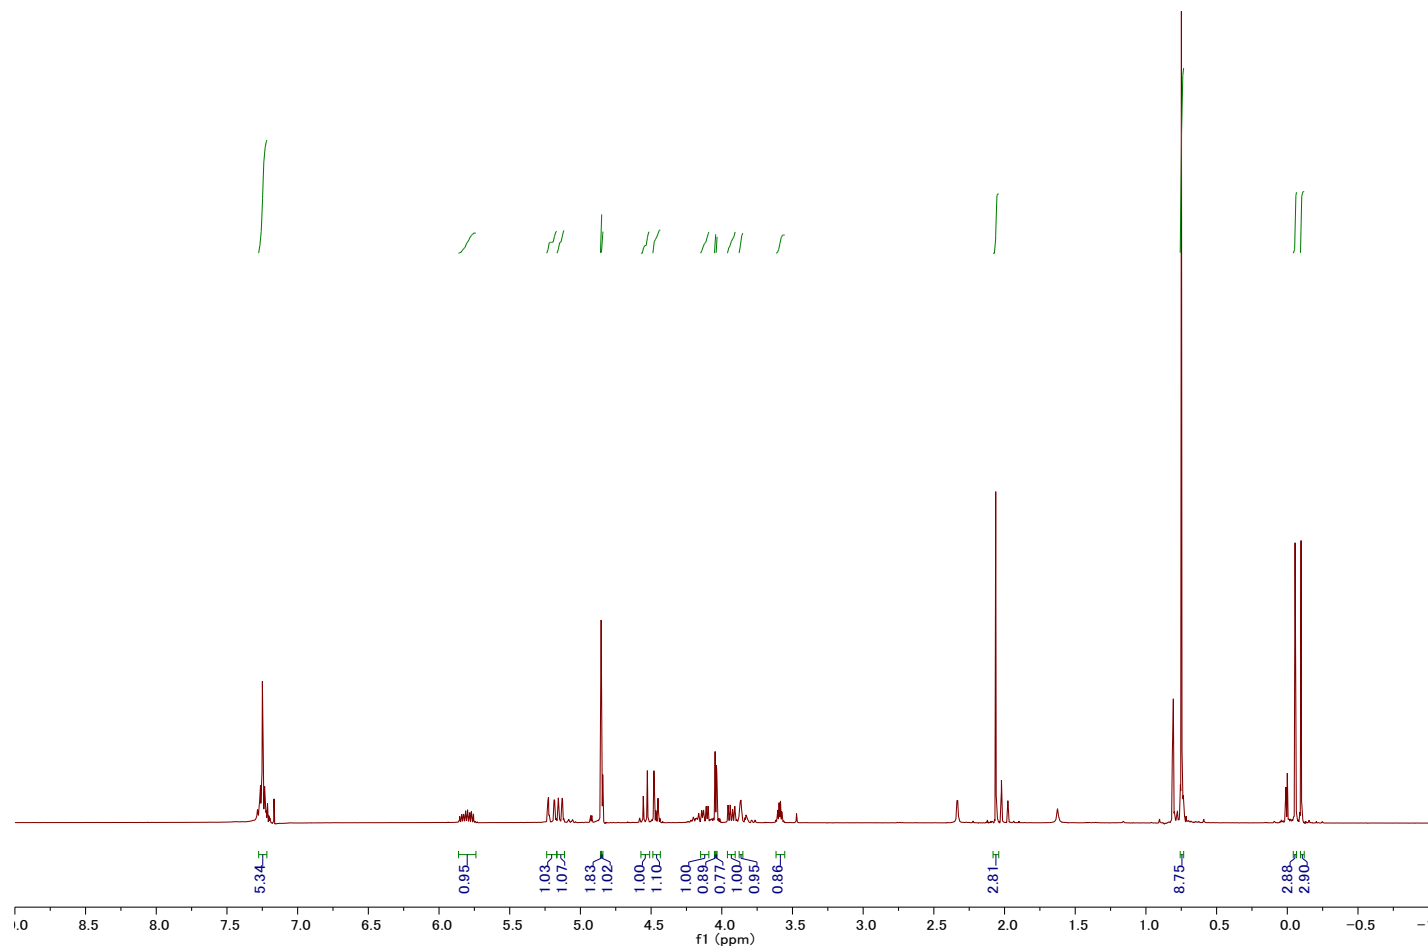

Allyl 7-*O*-acetyl-3-*O*-benzyl-4-*O*-*tert*-butyldimethylsilyl-6-oxo- $\alpha$ -D-*manno*-heptopyranoside (3)  $^{13}\text{C}$  NMR (100 MHz,  $\text{CDCl}_3$ )

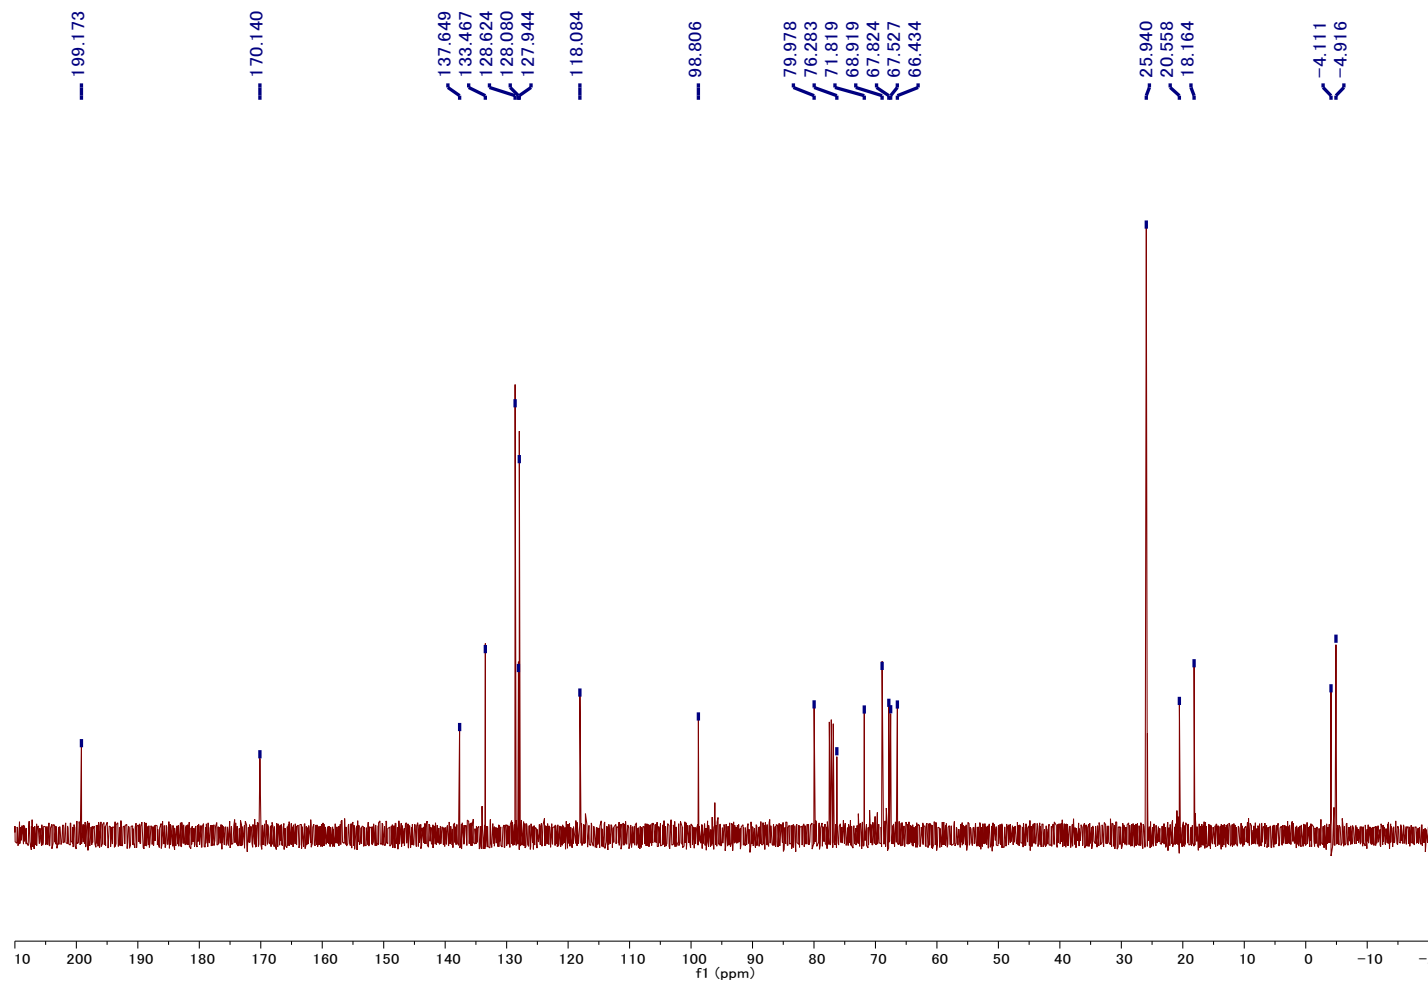



Allyl 7-*O*-acetyl-3-*O*-benzyl-4-*O*-*tert*-butyldimethylsilyl- $\alpha$ -D-glycero-D-manno-heptopyranoside (**4**)  $^1\text{H}$  NMR (400 MHz,  $\text{CDCl}_3$ )

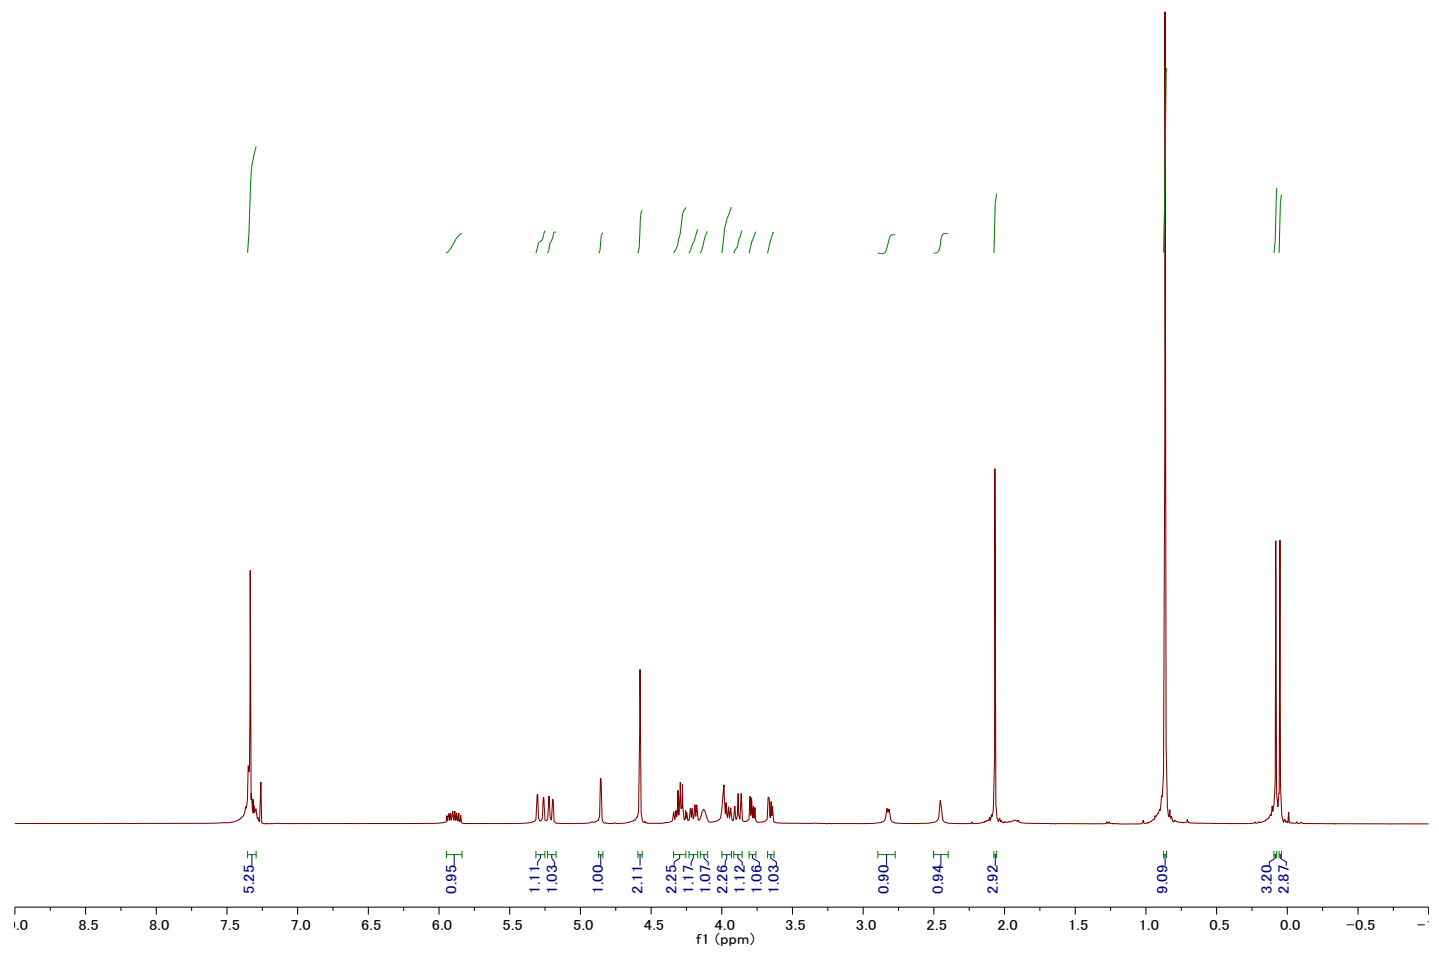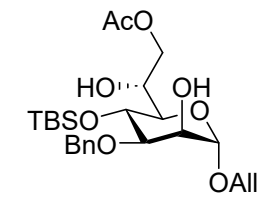

Allyl 7-*O*-acetyl-3-*O*-benzyl-4-*O*-*tert*-butyldimethylsilyl- $\alpha$ -D-glycero-D-manno-heptopyranoside (**4**)  $^{13}\text{C}$  NMR (100 MHz,  $\text{CDCl}_3$ )

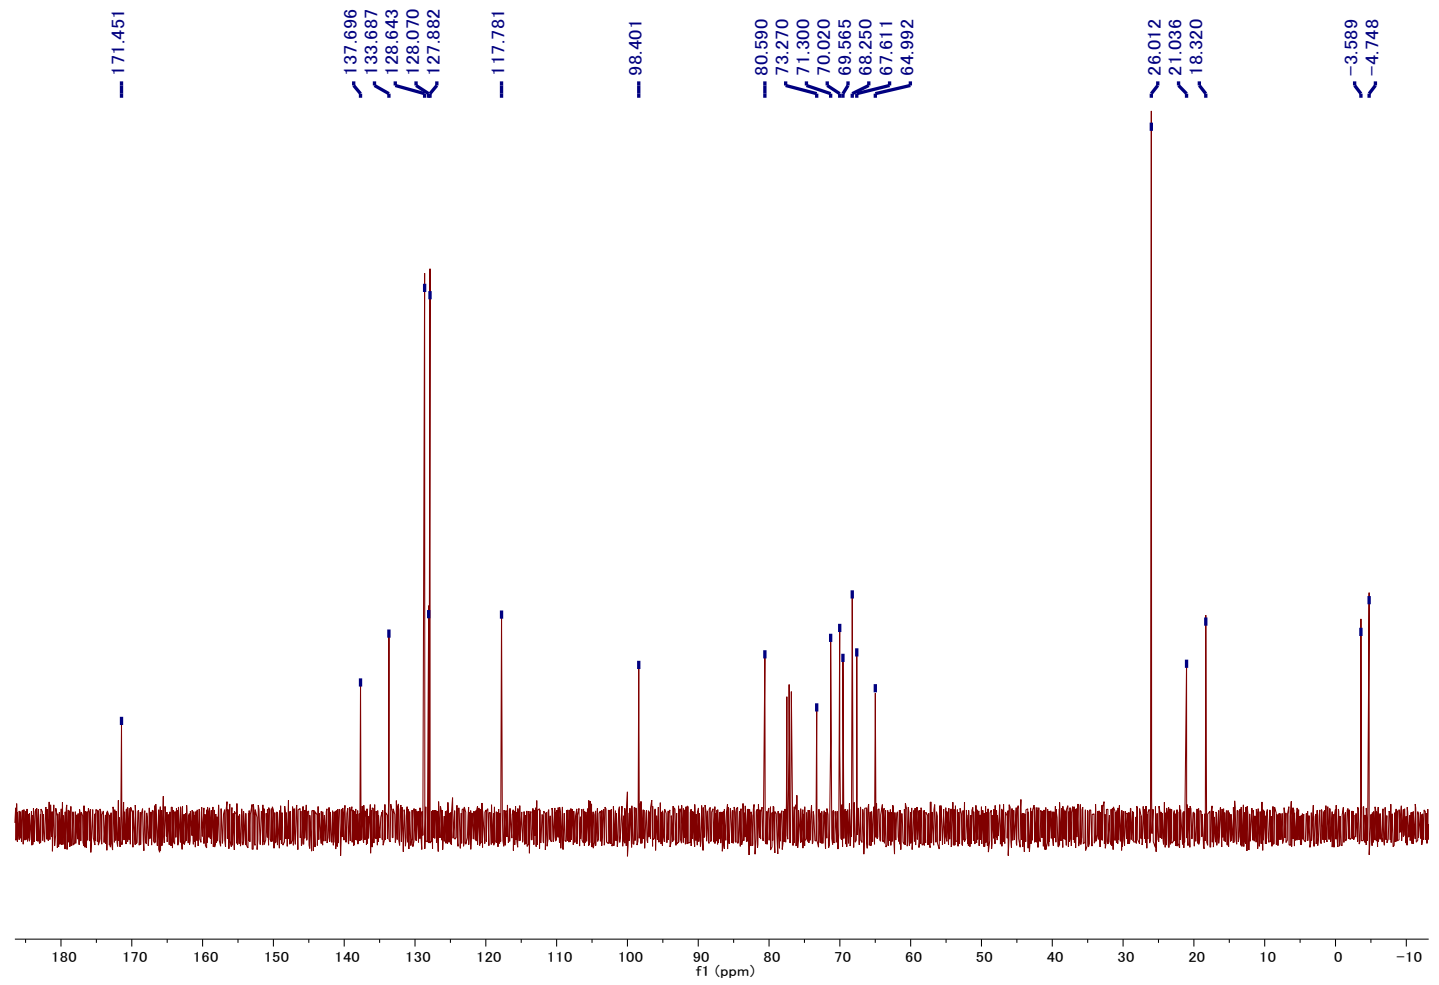

Allyl 7-O-acetyl-3-O-benzyl- $\alpha$ -D-glycero-D-manno-heptopyranoside (5)  $^1\text{H}$  NMR (400 MHz,  $\text{CDCl}_3$ )

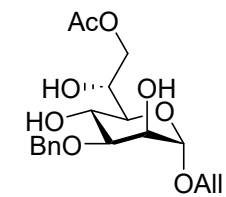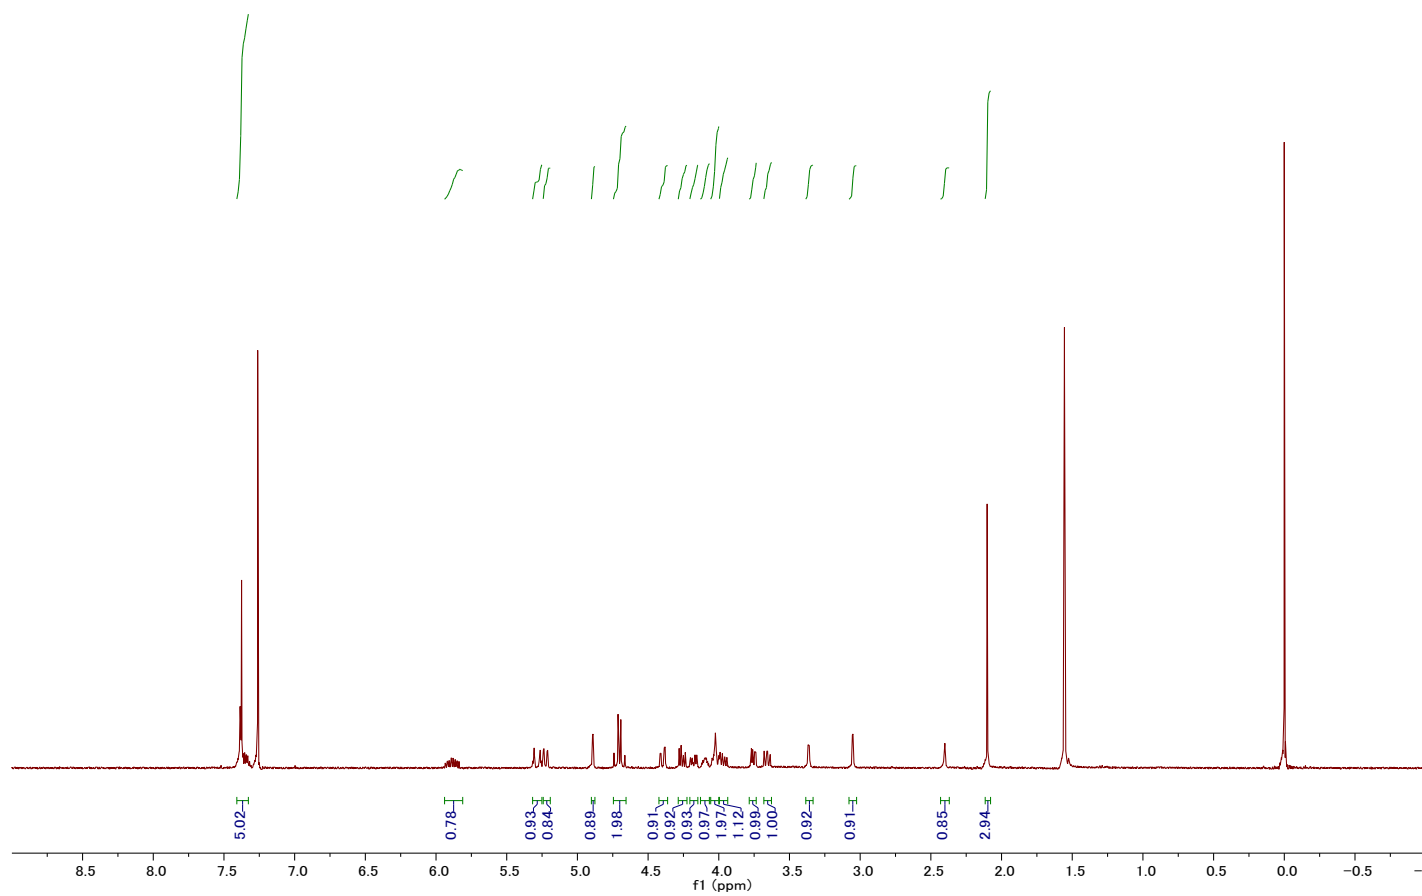

Allyl 7-O-acetyl-3-O-benzyl- $\alpha$ -D-glycero-D-manno-heptopyranoside (5)  $^{13}\text{C}$  NMR (100 MHz,  $\text{CDCl}_3$ )

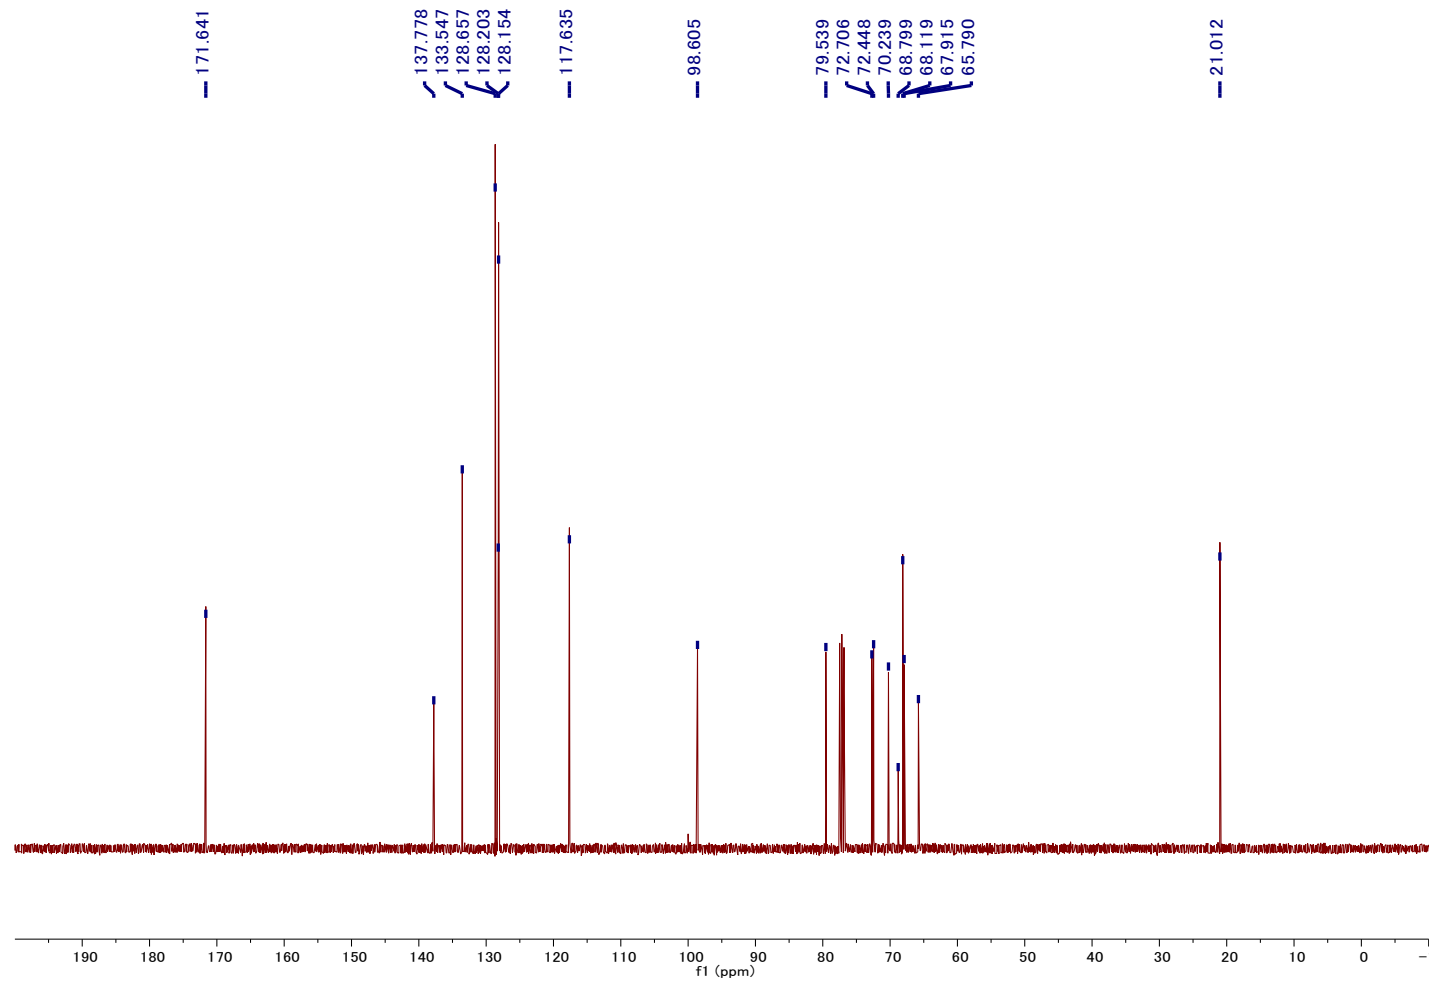

Allyl 7-O-acetyl-3-O-benzyl-4,6-O-benzylidene- $\alpha$ -D-glycero-D-manno-heptopyranoside (6)  $^1\text{H}$  NMR (400 MHz,  $\text{CDCl}_3$ )

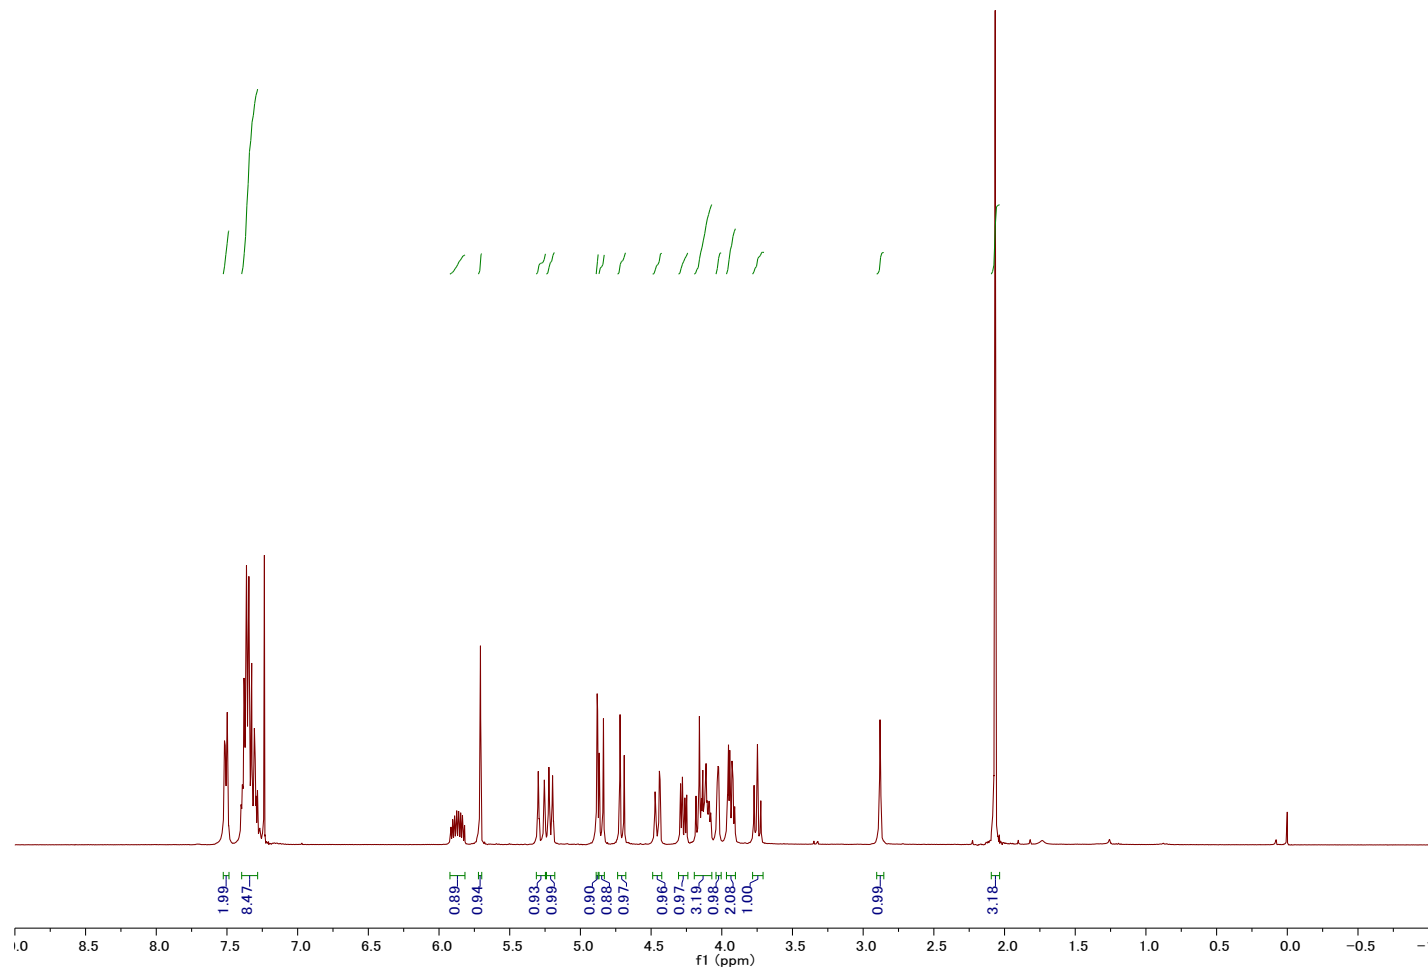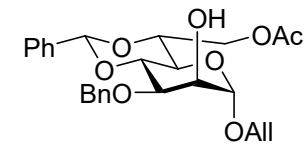

Allyl 7-*O*-acetyl-3-*O*-benzyl-4,6-*O*-benzylidene- $\alpha$ -D-glycero-D-manno-heptopyranoside (6)  $^{13}\text{C}$  NMR (100 MHz,  $\text{CDCl}_3$ )

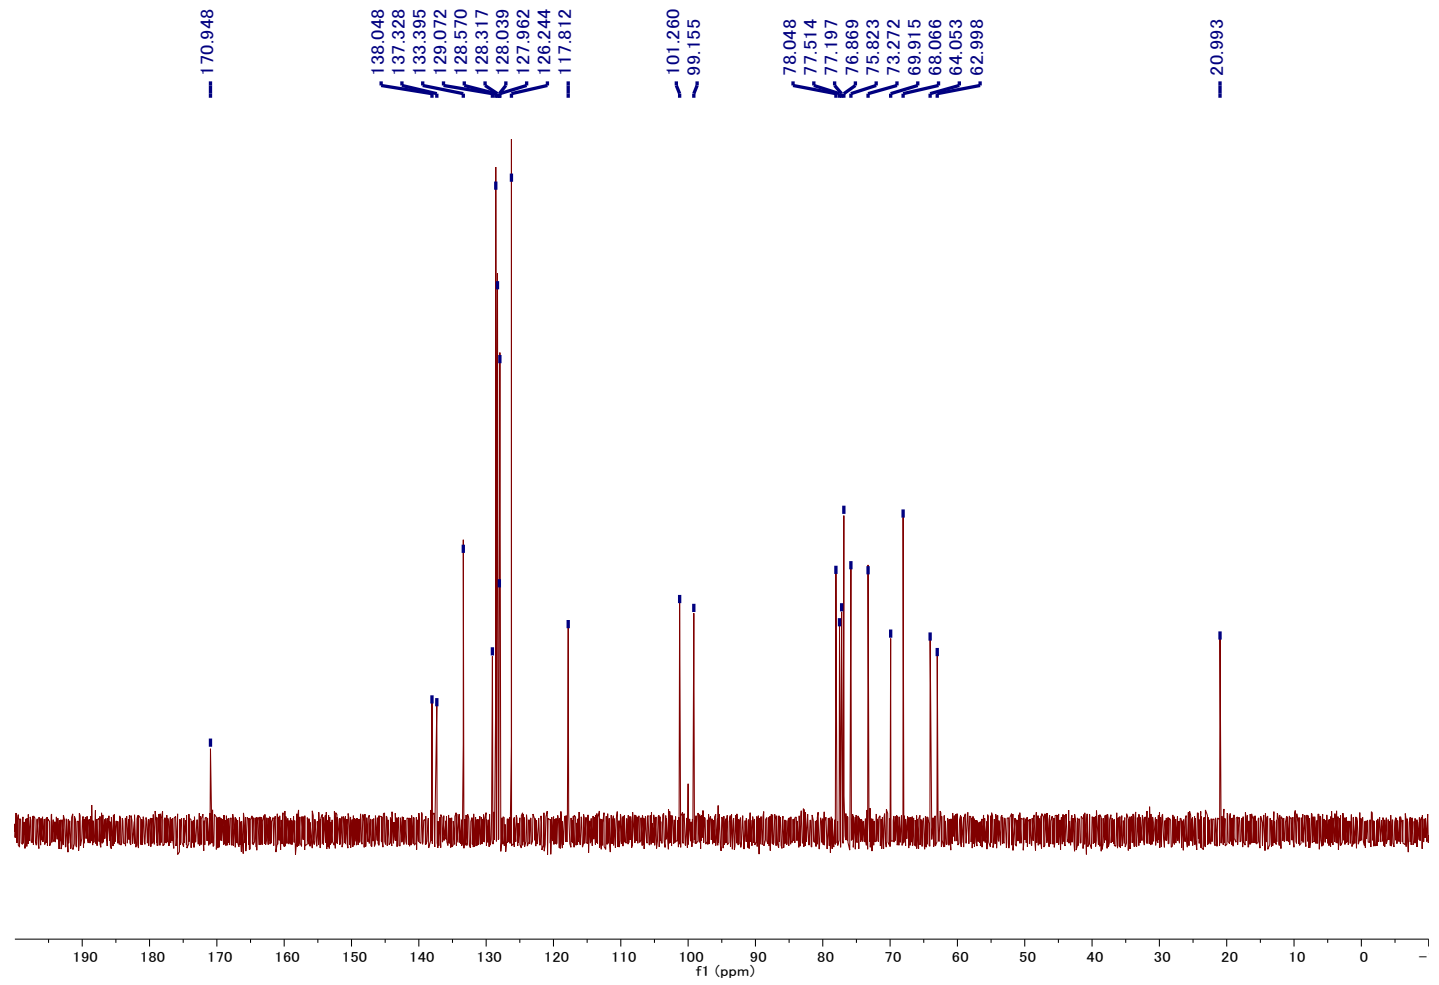

Allyl 2,3-*O*-dibenzyl-4,6-*O*-benzylidene- $\alpha$ -D-glycero-D-manno-heptopyranoside (7)  $^1\text{H}$  NMR (400 MHz,  $\text{CDCl}_3$ )

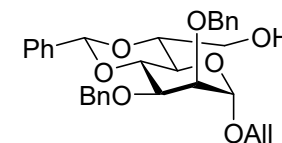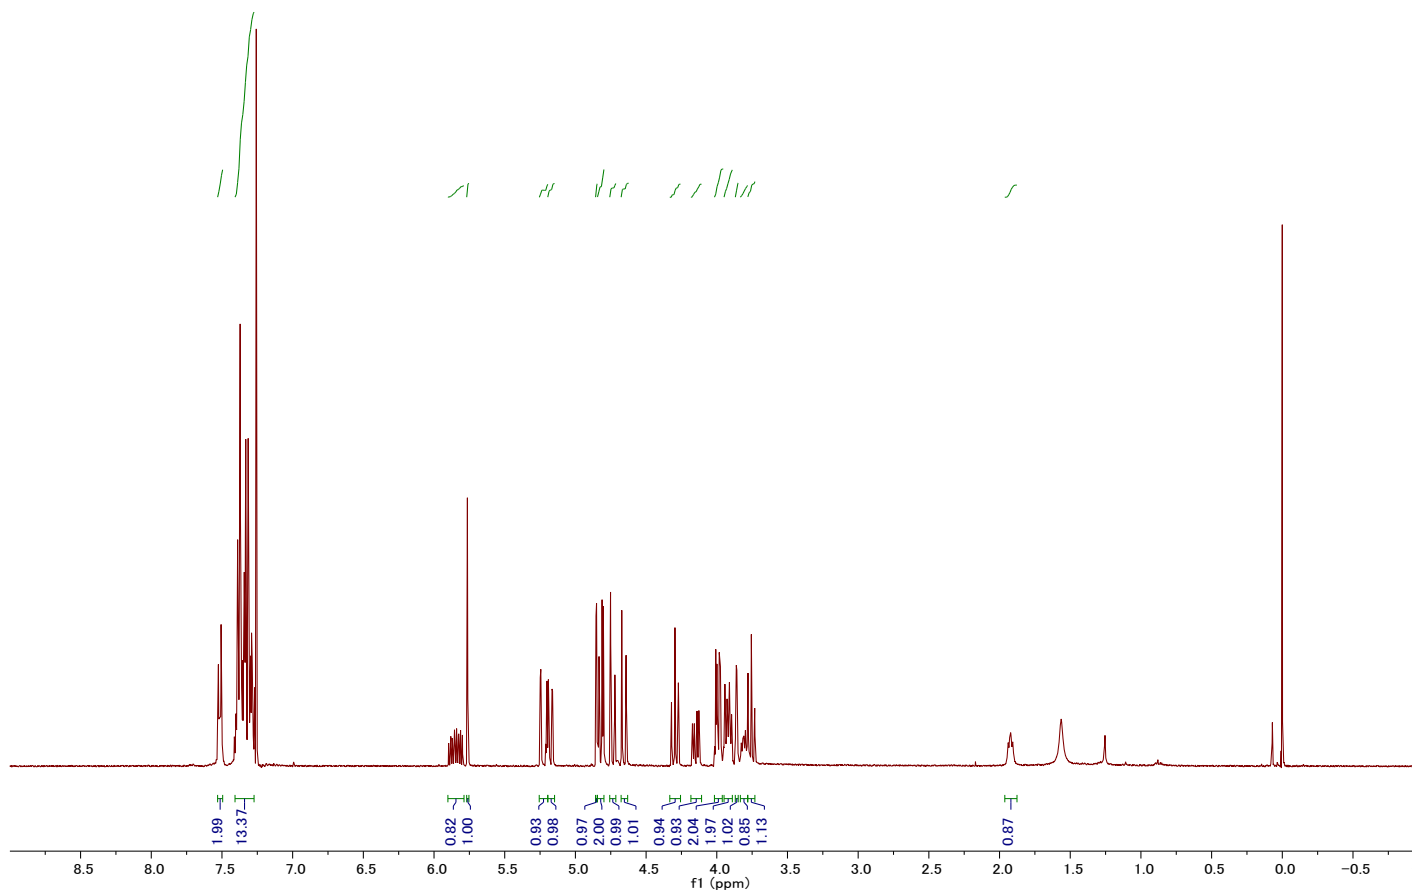

Allyl 2,3-*O*-dibenzyl-4,6-*O*-benzylidene- $\alpha$ -D-glycero-D-manno-heptopyranoside (7)  $^{13}\text{C}$  NMR (100 MHz,  $\text{CDCl}_3$ )

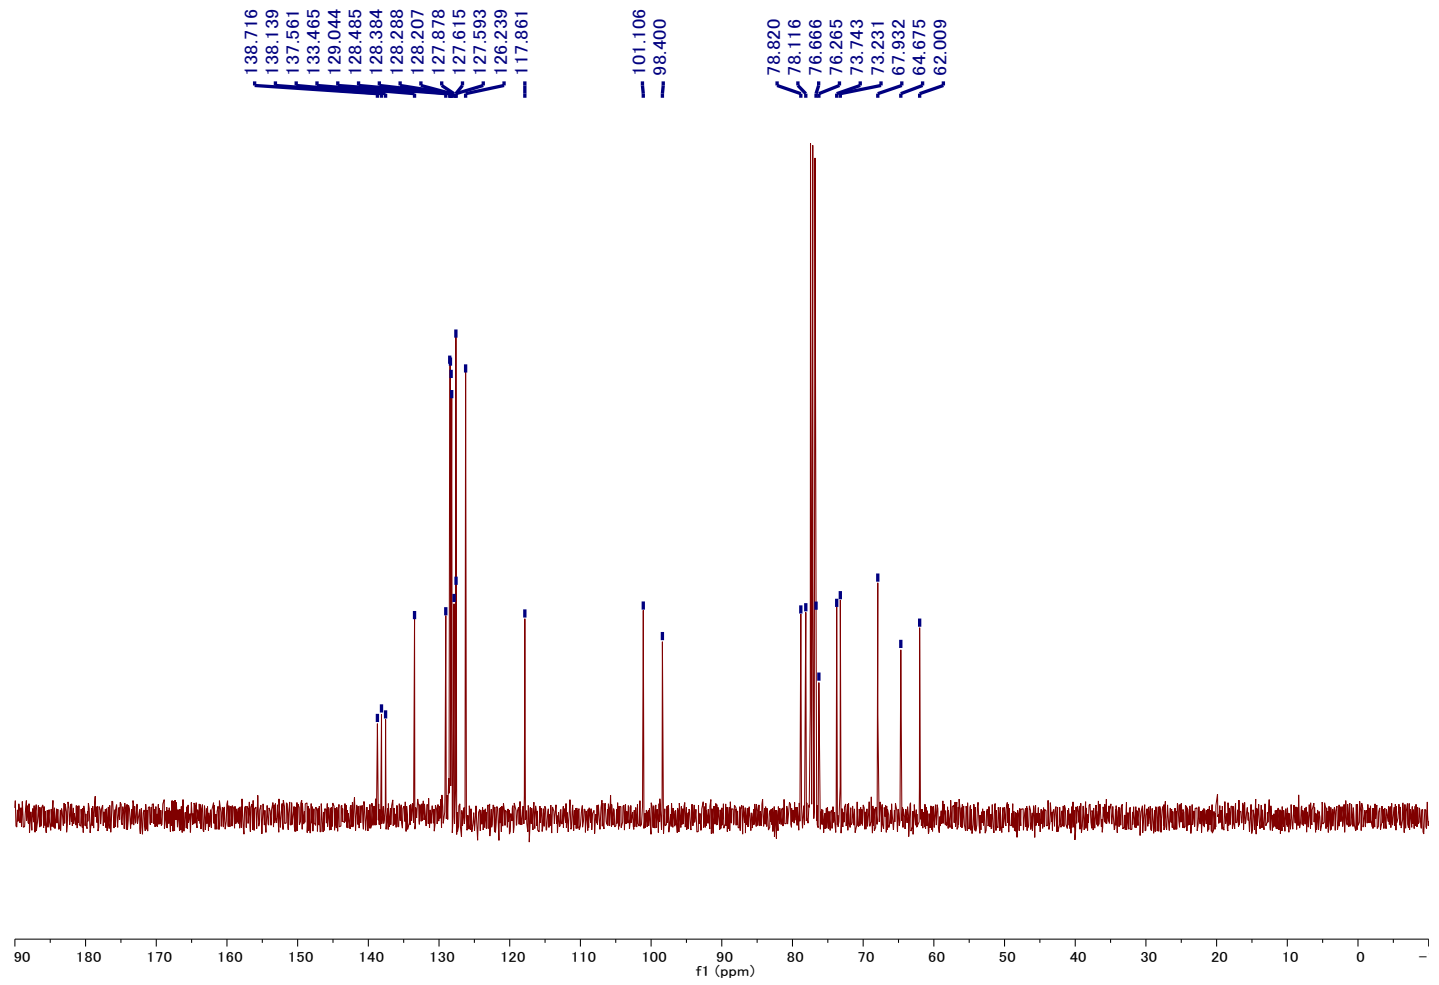



(Allyl 2,3-O-dibenzyl-4,6-O-benzylidene- $\alpha$ -D-glycero-D-manno-heptopyranoside)-7-yl *o*-xylenyl phosphate (8)  $^1\text{H}$  NMR (400 MHz,  $\text{CDCl}_3$ )

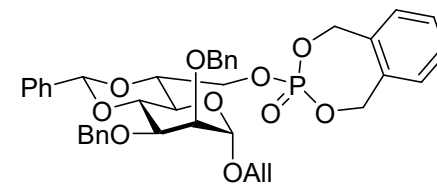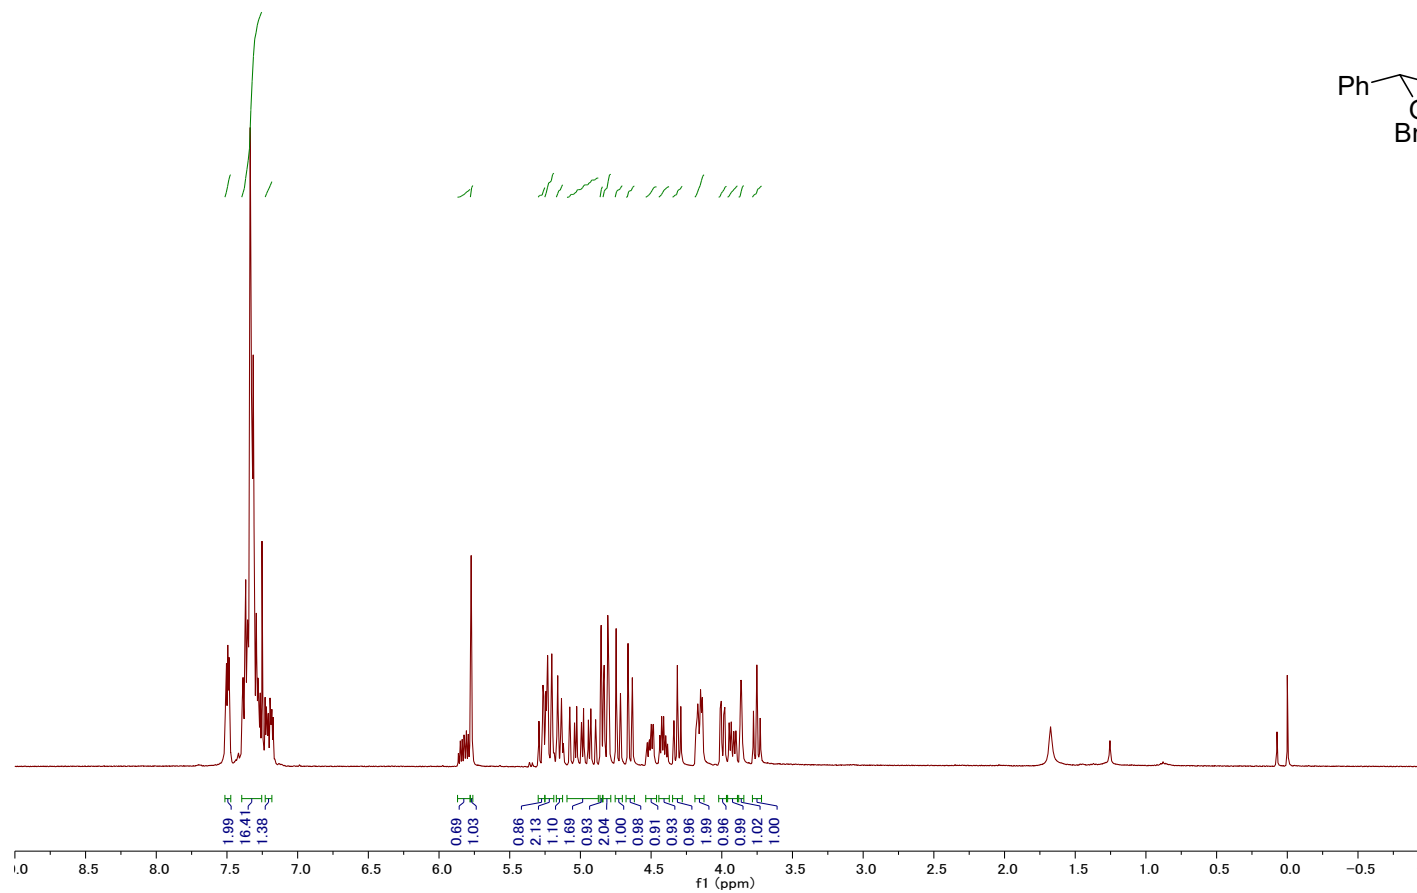

(Allyl 2,3-*O*-dibenzyl-4,6-*O*-benzylidene- $\alpha$ -D-glycero-D-manno-heptopyranoside)-7-yl *o*-xylenyl phosphate (8)  $^{13}\text{C}$  NMR (100 MHz,  $\text{CDCl}_3$ )

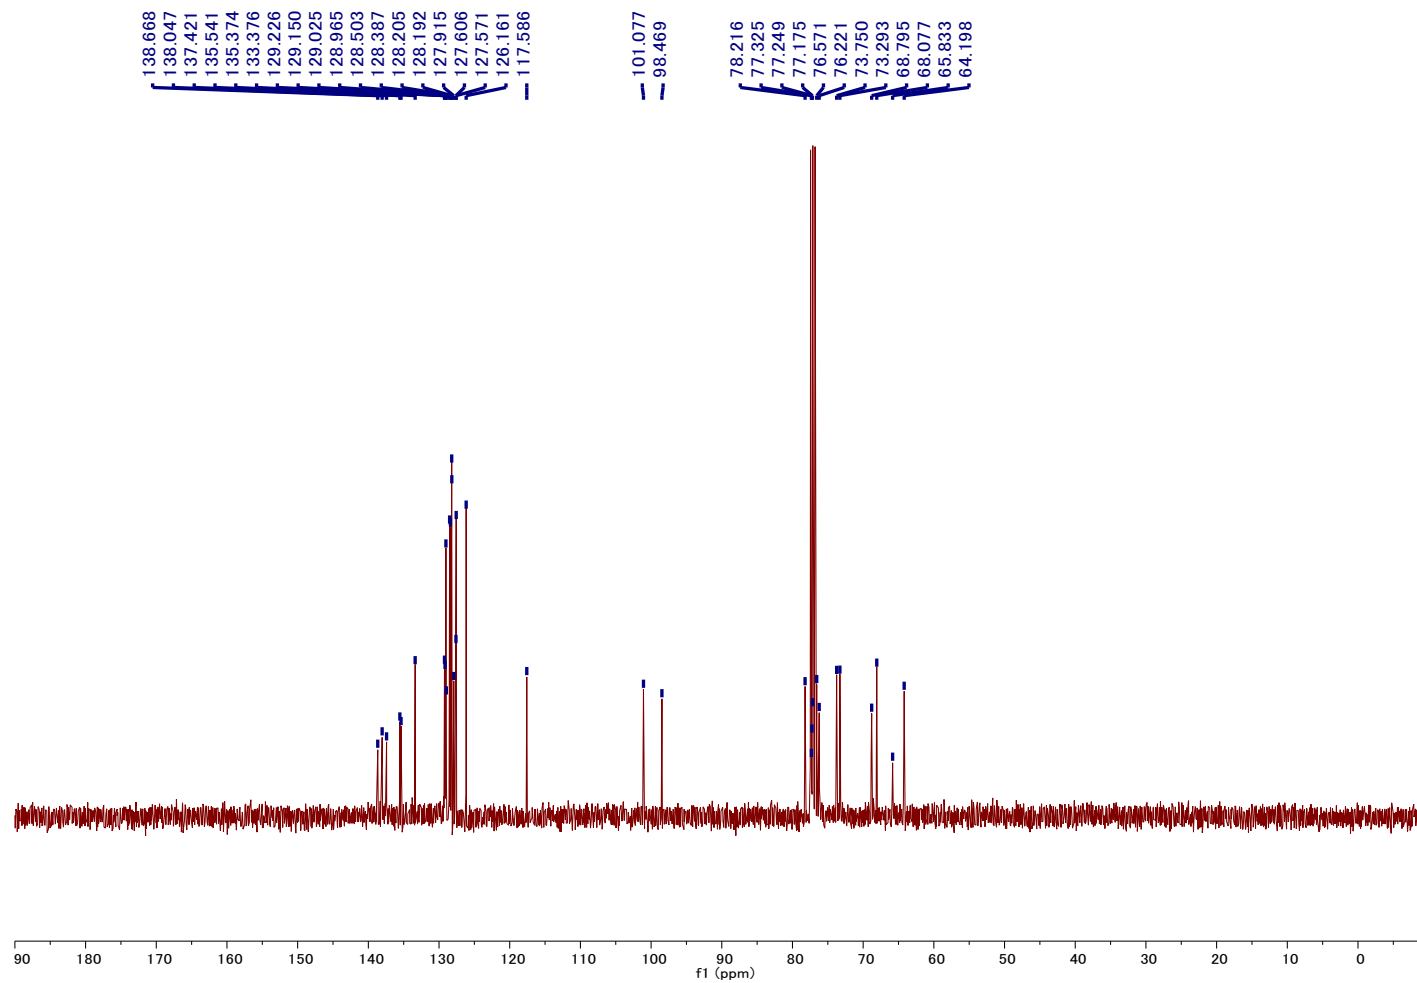

(Allyl 2,3-*O*-dibenzyl-4,6-*O*-benzylidene- $\alpha$ -D-glycero-D-manno-heptopyranoside)-7-yl *o*-xylenyl phosphate (**8**)  $^{31}\text{P}$  NMR (161 MHz,  $\text{CDCl}_3$ )

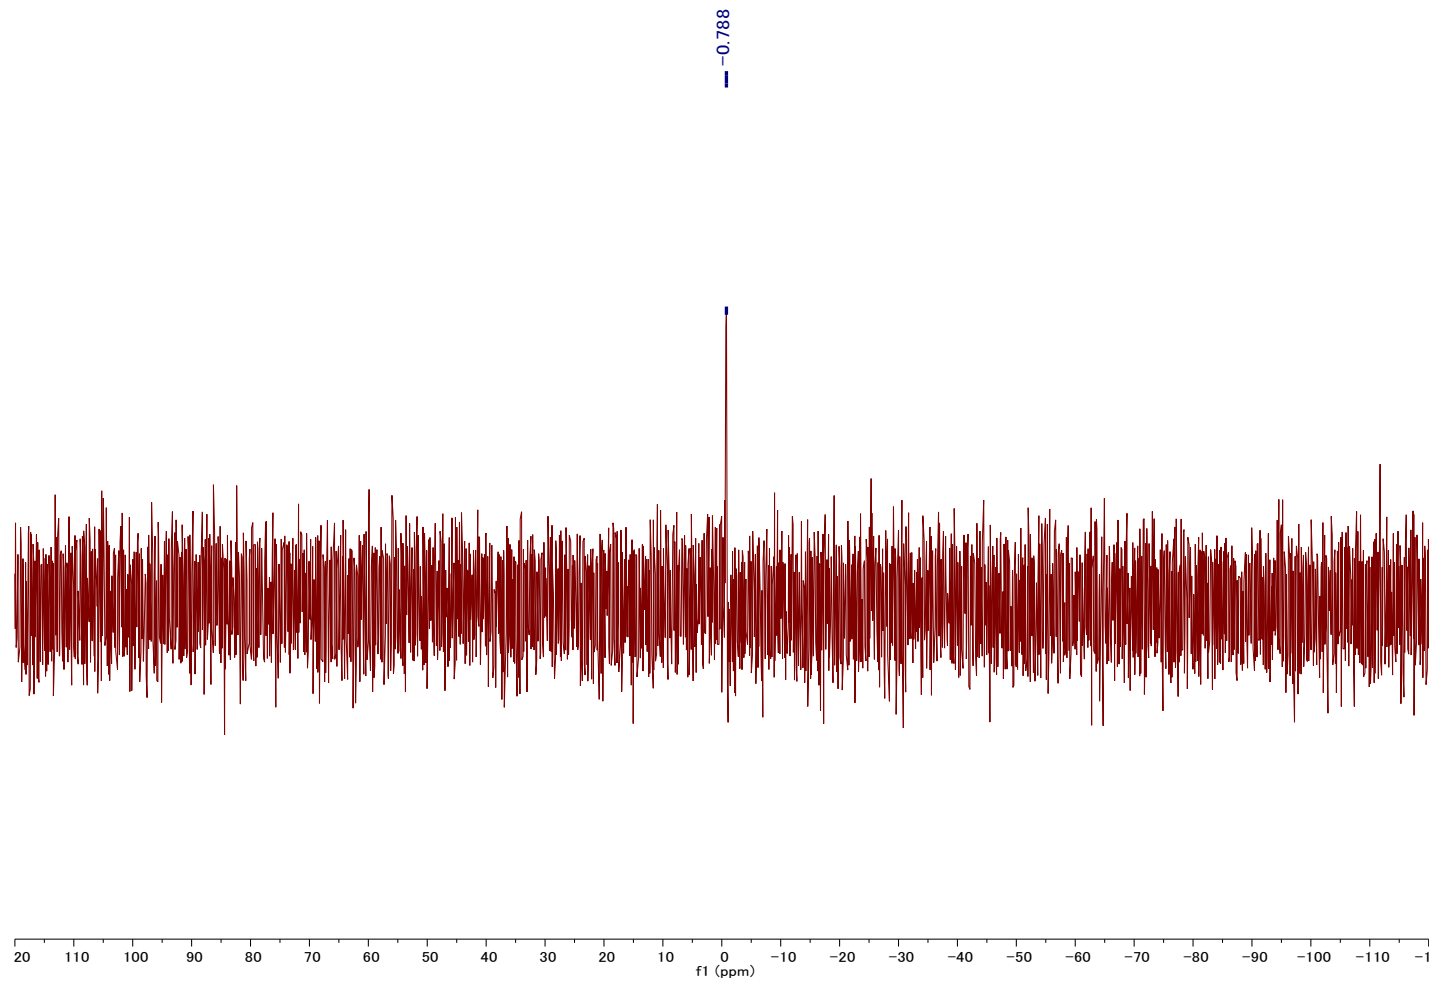

(2,3-*O*-dibenzyl-4,6-*O*-benzylidene- $\alpha$ -D-glycero-D-manno-heptopyranoside)-7-yl-*o*-xylenyl phosphate (9)  $^1\text{H}$  NMR (400 MHz,  $\text{CDCl}_3$ )

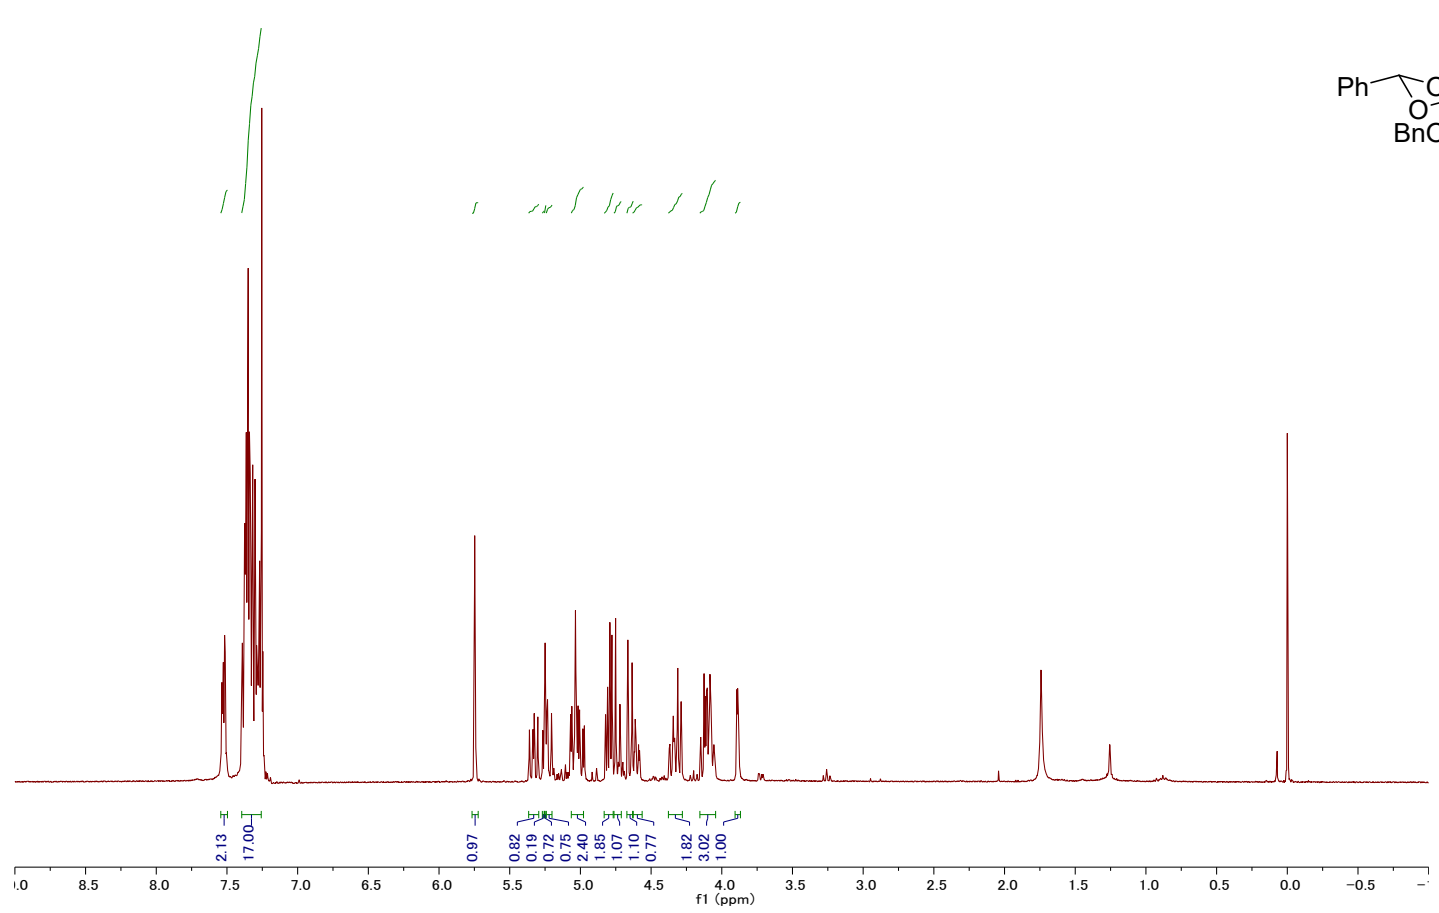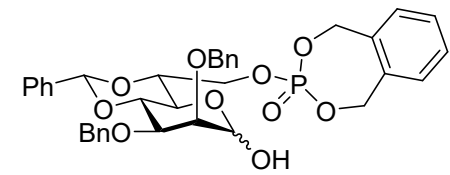

(2,3-*O*-dibenzyl-4,6-*O*-benzylidene- $\alpha$ -D-glycero-D-manno-heptopyranoside)-7-yl-*o*-xylenyl phosphate (9)  $^{13}\text{C}$  NMR (100 MHz,  $\text{CDCl}_3$ )

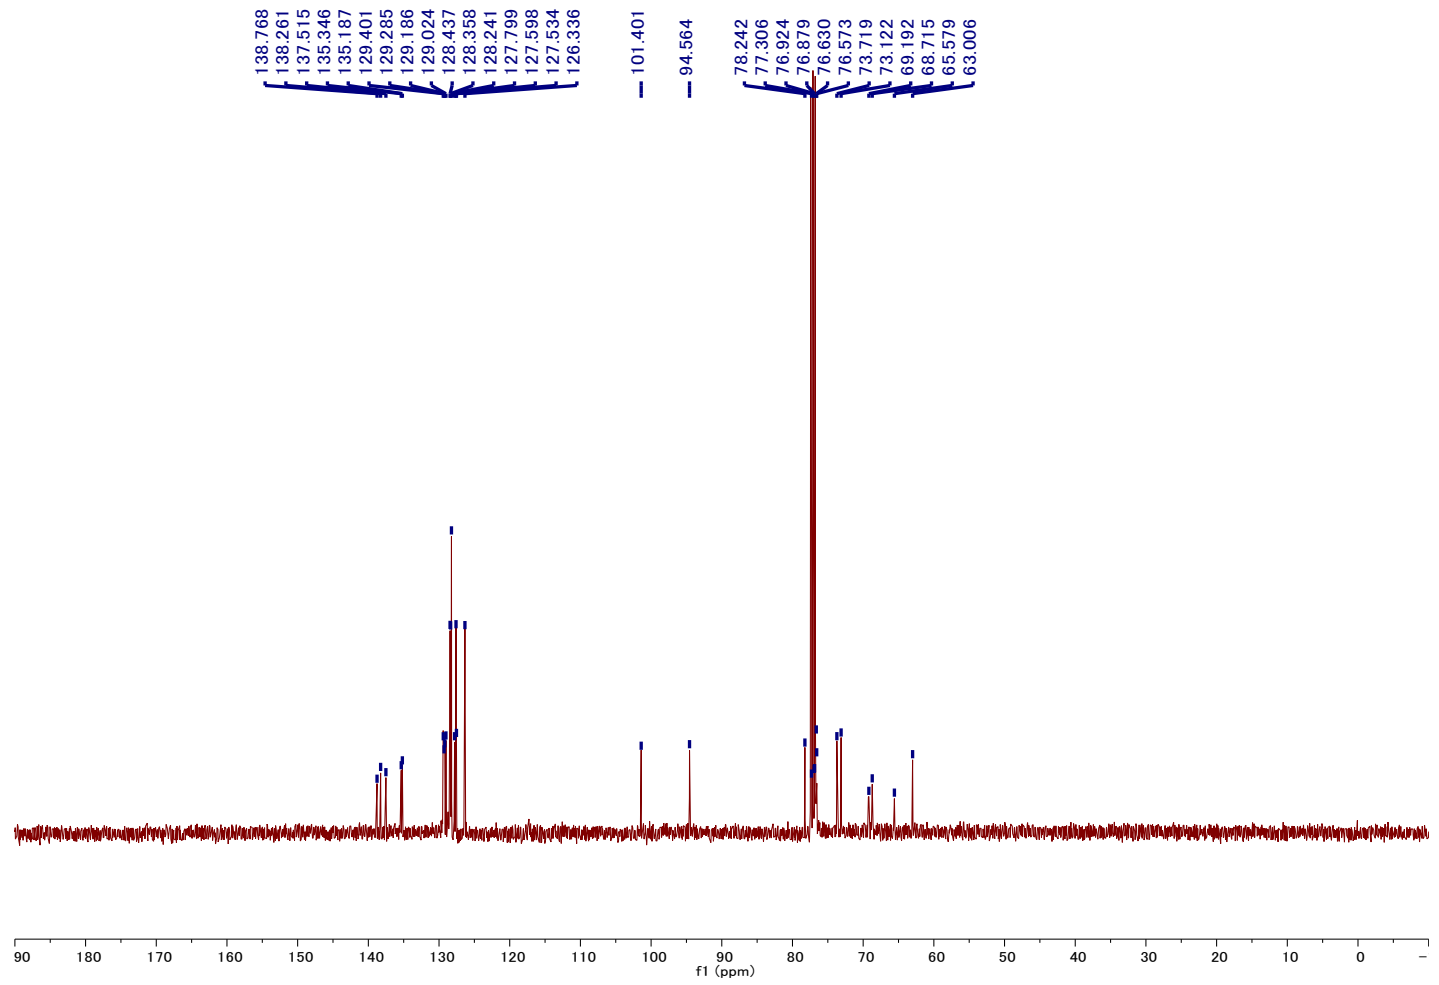

(2,3-*O*-dibenzyl-4,6-*O*-benzylidene- $\alpha$ -D-glycero-D-manno-heptopyranoside)-7-yl-*o*-xylenyl phosphate (9)  $^{31}\text{P}$  NMR (161 MHz,  $\text{CDCl}_3$ )

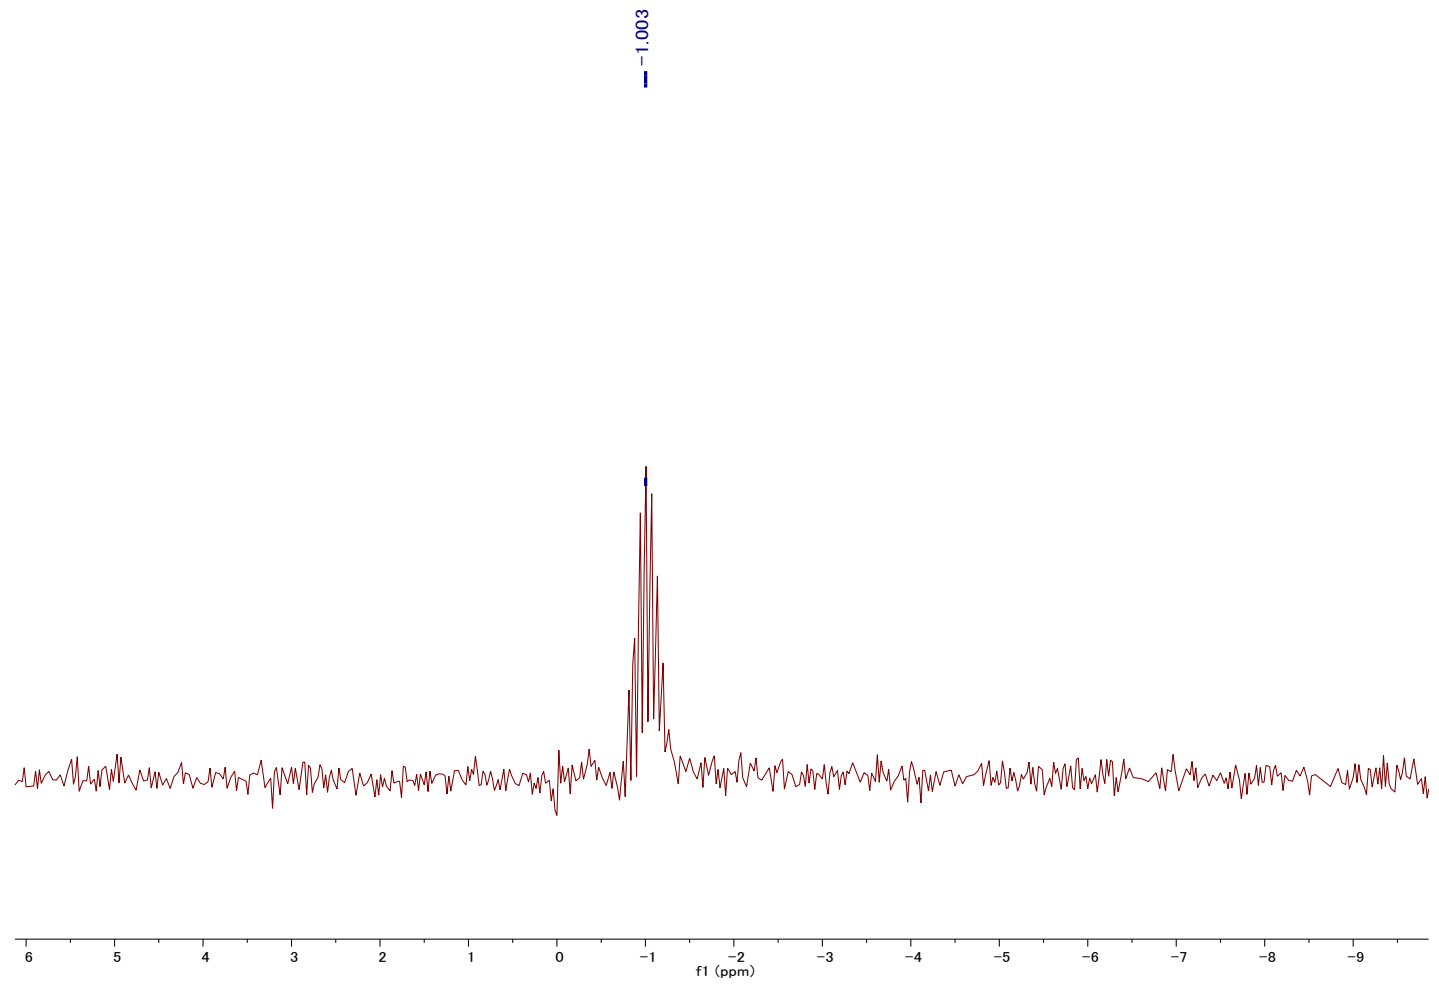

1-Bis(benzyloxy)phosphoryl-2,3-O-dibenzyl-4,6-O-benzylidene- $\alpha$ -D-glycero-D-manno-heptopyranos-7-yl *o*-xylenyl phosphate (11 $\alpha$ )  $^1\text{H}$  NMR (400 MHz,  $\text{CDCl}_3$ )

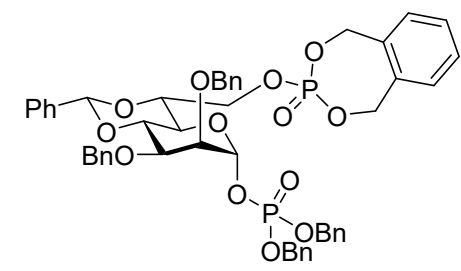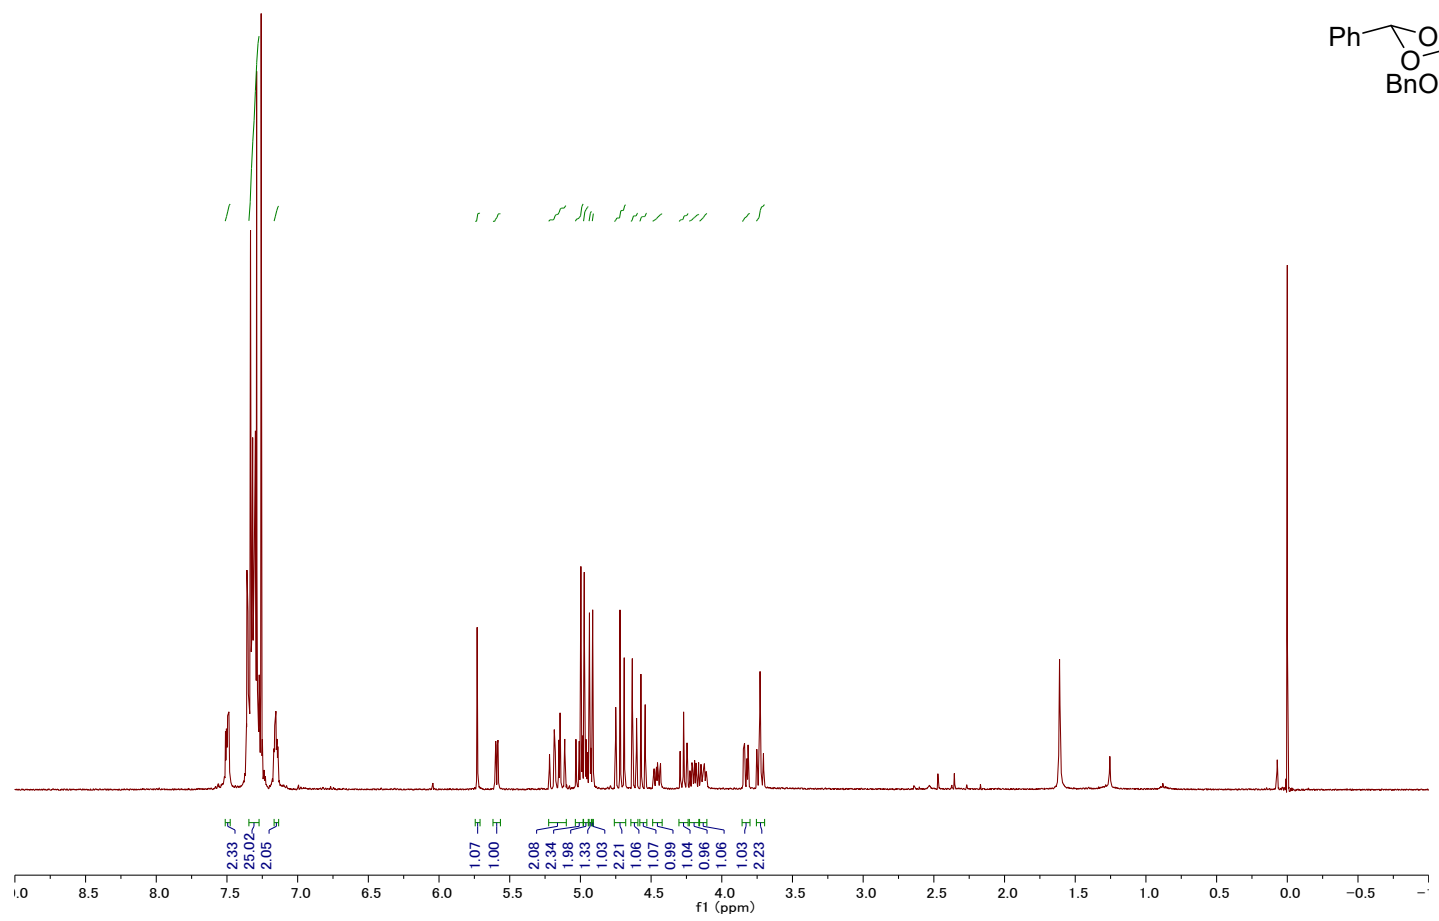

**1-Bis(benzyloxy)phosphoryl-2,3-*O*-dibenzyl-4,6-*O*-benzylidene- $\alpha$ -D-glycero-D-manno-heptopyranos-7-yl *o*-xylenyl phosphate (11 $\alpha$ )** <sup>13</sup>C NMR (100 MHz, CDCl<sub>3</sub>)

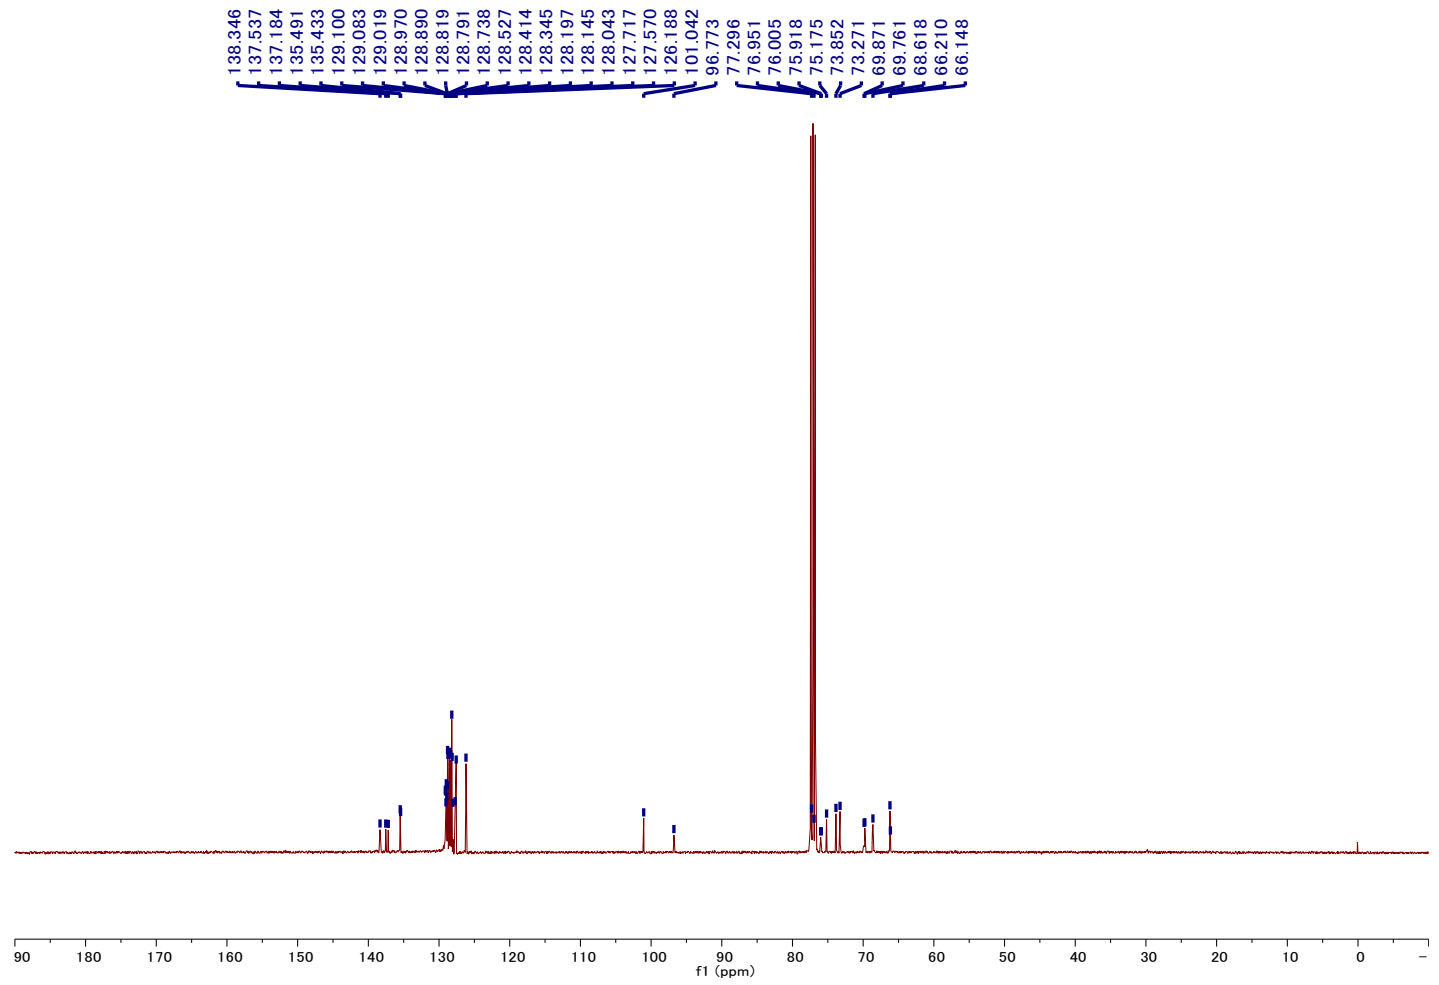



1-Bis(benzyloxy)phosphoryl-2,3-*O*-dibenzyl-4,6-*O*-benzylidene- $\alpha$ -D-glycero-D-manno-heptopyranos-7-yl *o*-xylenyl phosphate (**11 $\alpha$** )  $^{31}\text{P}$  NMR (161 MHz,  $\text{CDCl}_3$ )

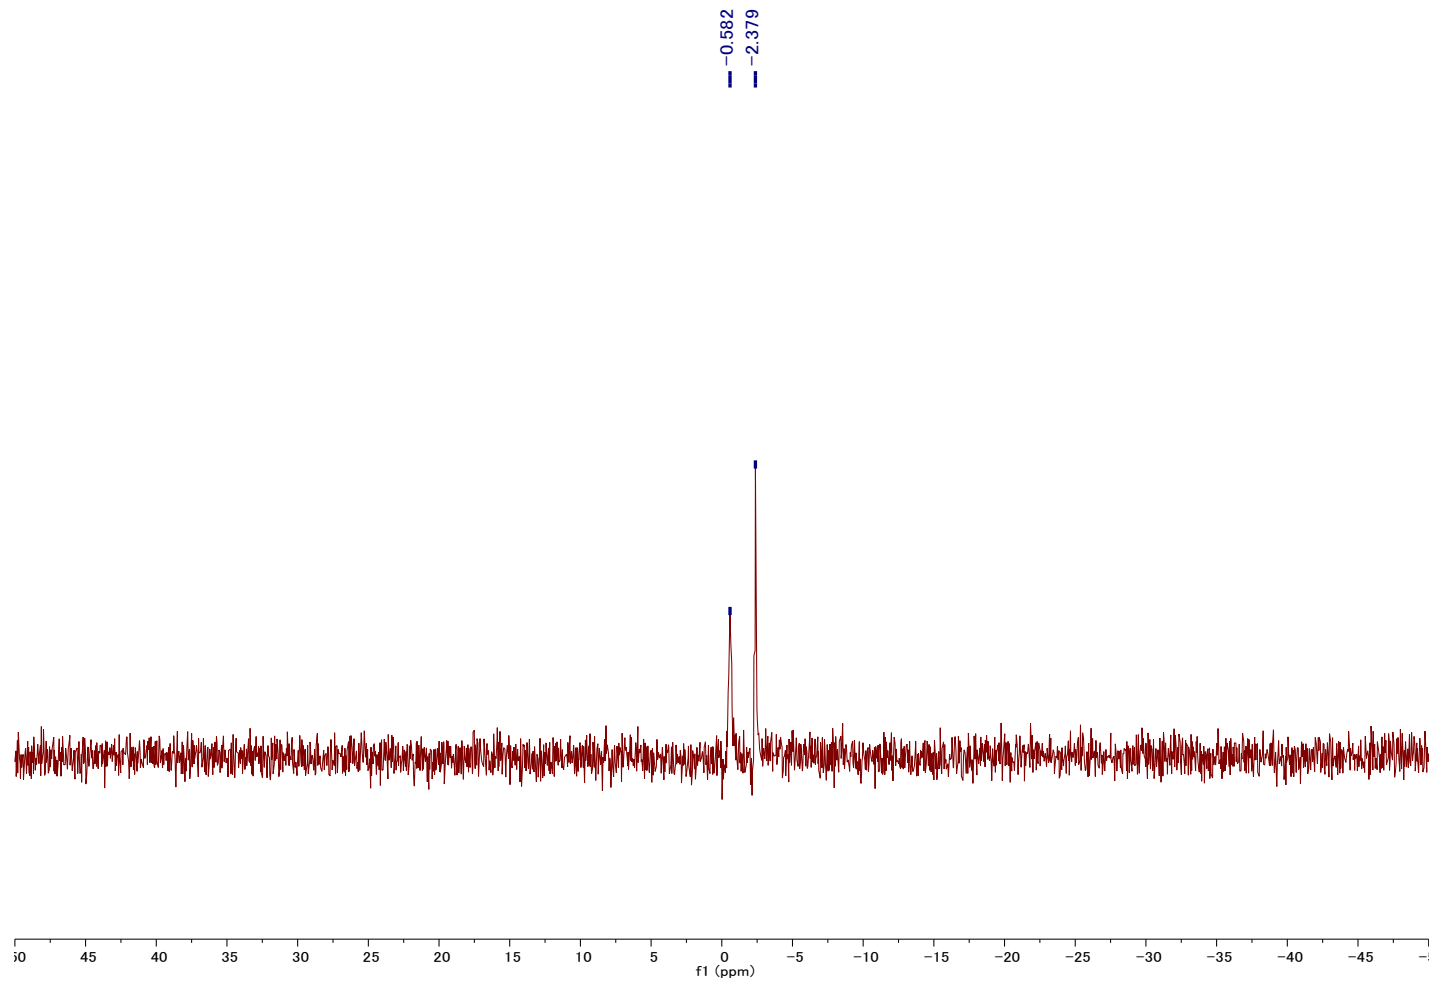

1-bis(benzyloxy)phosphoryl-2,3-*O*-dibenzyl-4,6-*O*-benzylidene- $\beta$ -D-glycero-D-manno-heptopyranos-7-yl *o*-xylenyl phosphate (11 $\beta$ ) <sup>1</sup>H NMR (400 MHz, CDCl<sub>3</sub>)

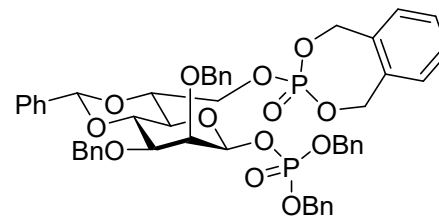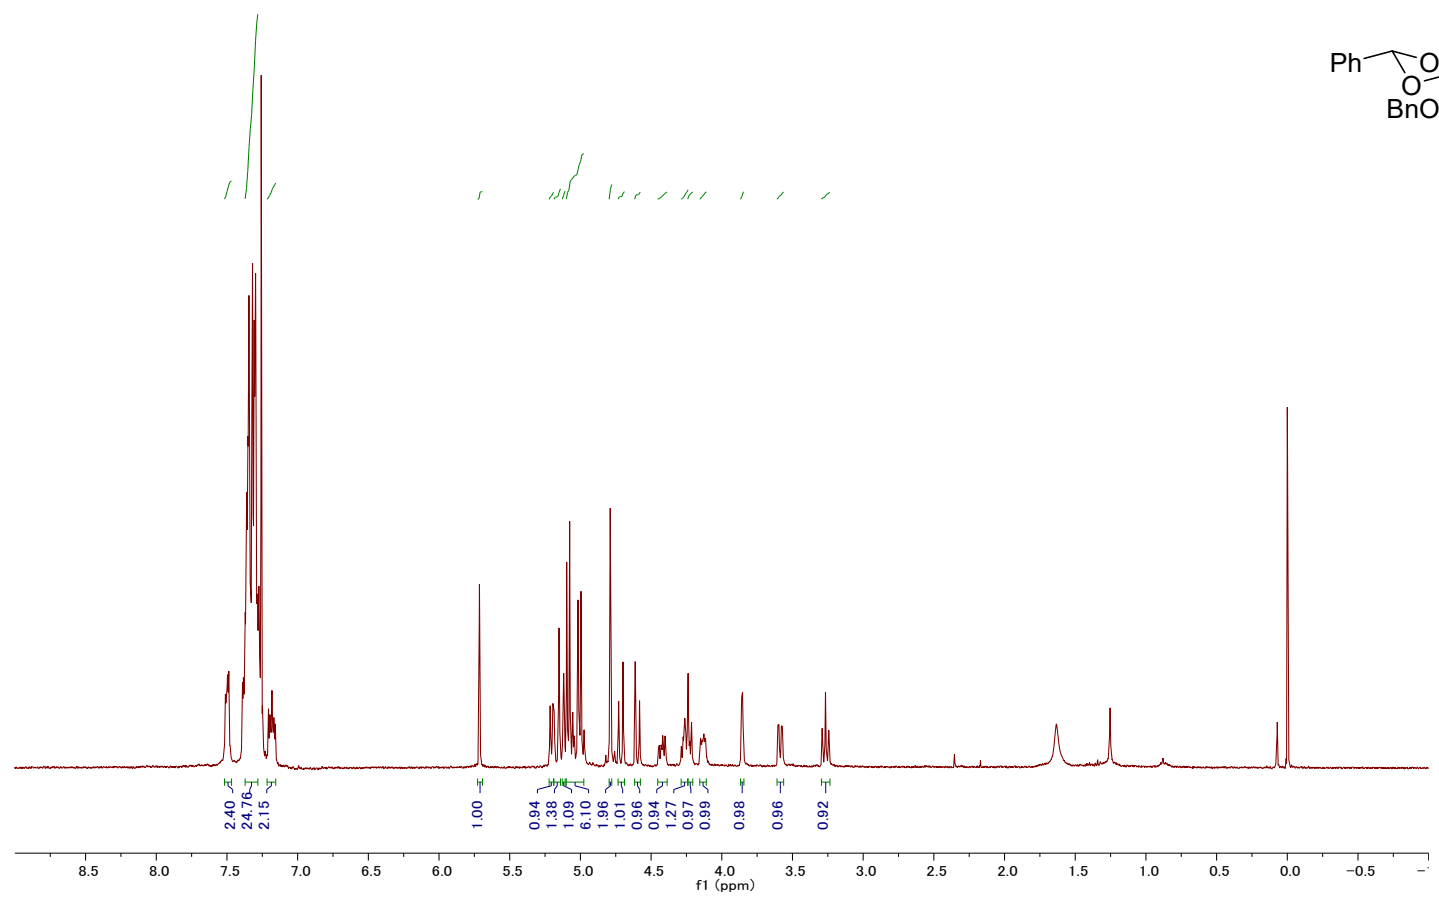

1-bis(benzyloxy)phosphoryl-2,3-*O*-dibenzyl-4,6-*O*-benzylidene- $\beta$ -D-glycero-D-manno-heptopyranos-7-yl *o*-xylenyl phosphate (**11** $\beta$ )  $^{13}\text{C}$  NMR (100 MHz,  $\text{CDCl}_3$ )

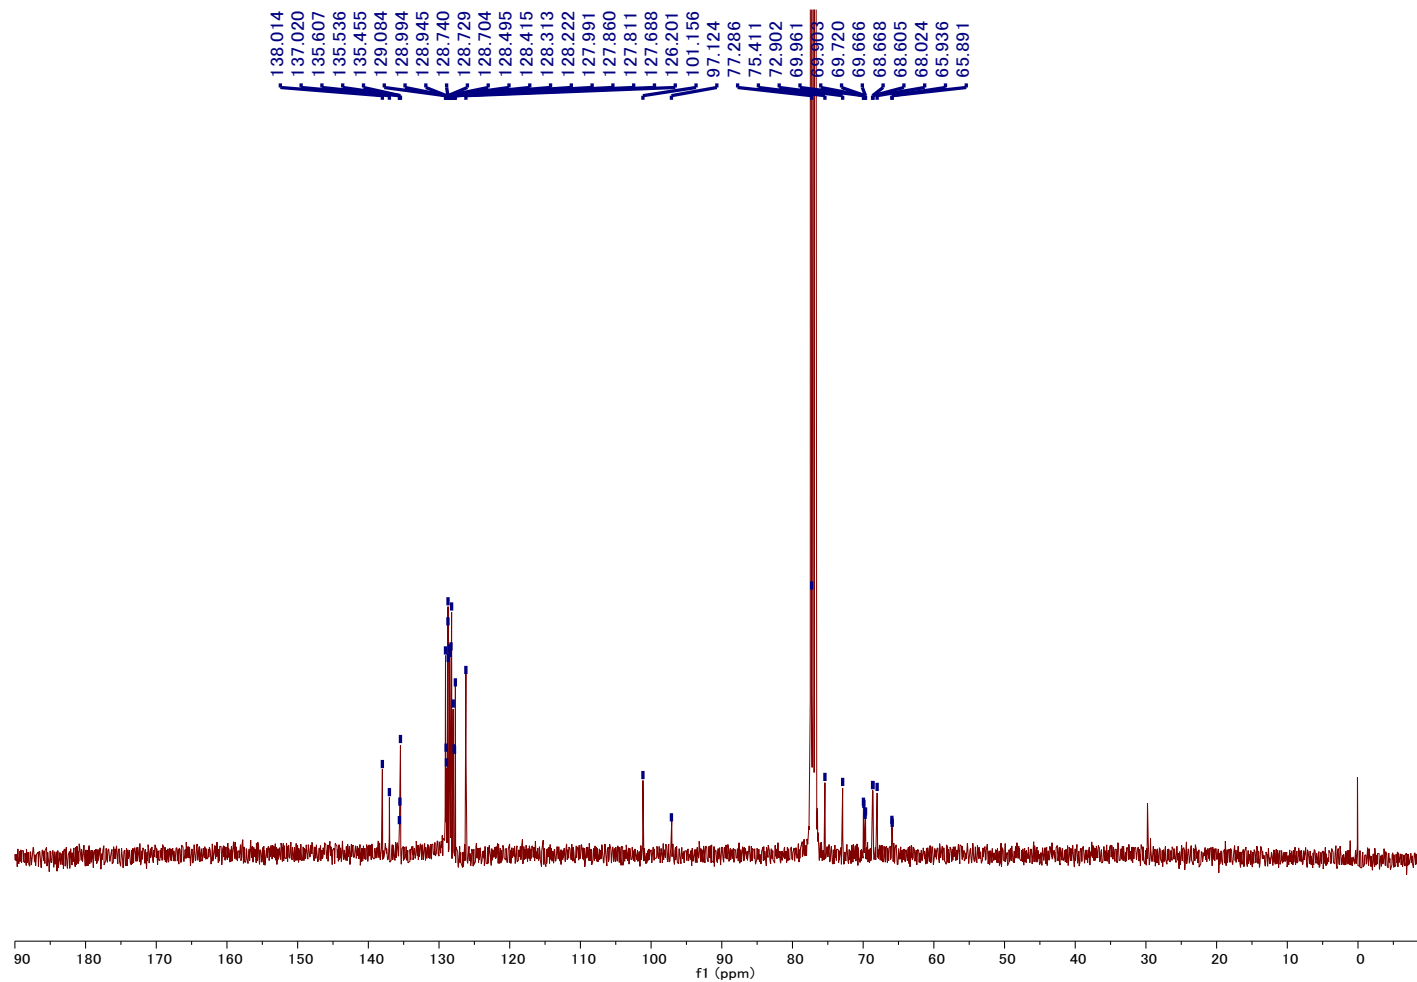

1-bis(benzyloxy)phosphoryl-2,3-*O*-dibenzyl-4,6-*O*-benzylidene- $\beta$ -D-glycero-D-manno-heptopyranos-7-yl *o*-xylenyl phosphate (**11 $\beta$** )  $^{31}\text{P}$  NMR (161 MHz,  $\text{CDCl}_3$ )

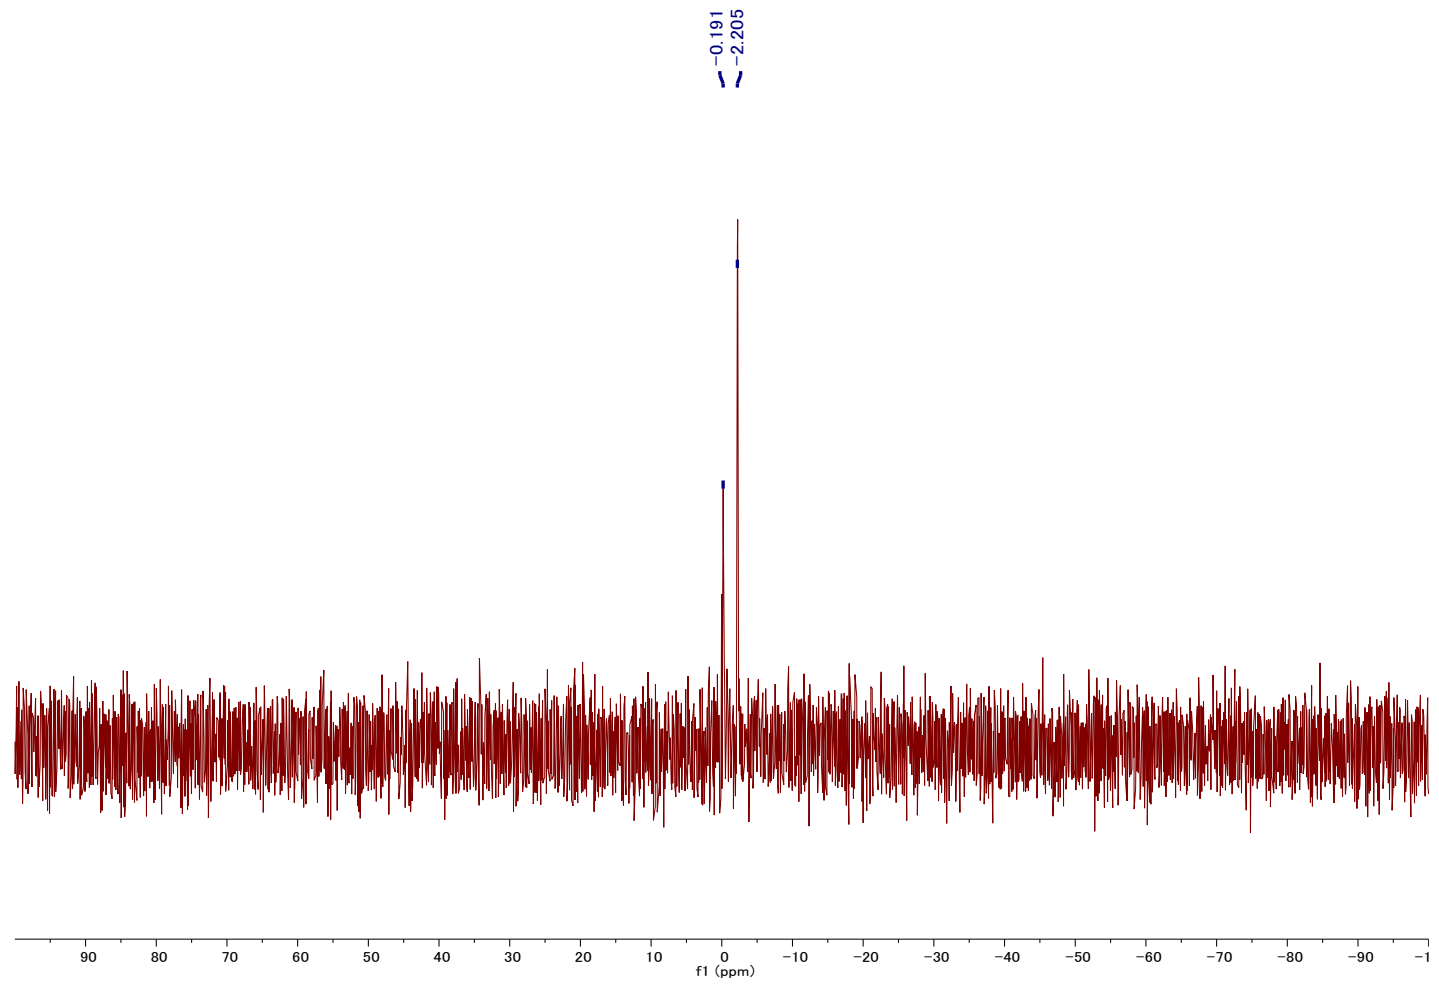

1,7-*O*-Bisphosphoryl- $\beta$ -D-glycero-D-manno-heptopyranose (HBP)  $^1\text{H}$  NMR (400 MHz,  $\text{D}_2\text{O}$ )

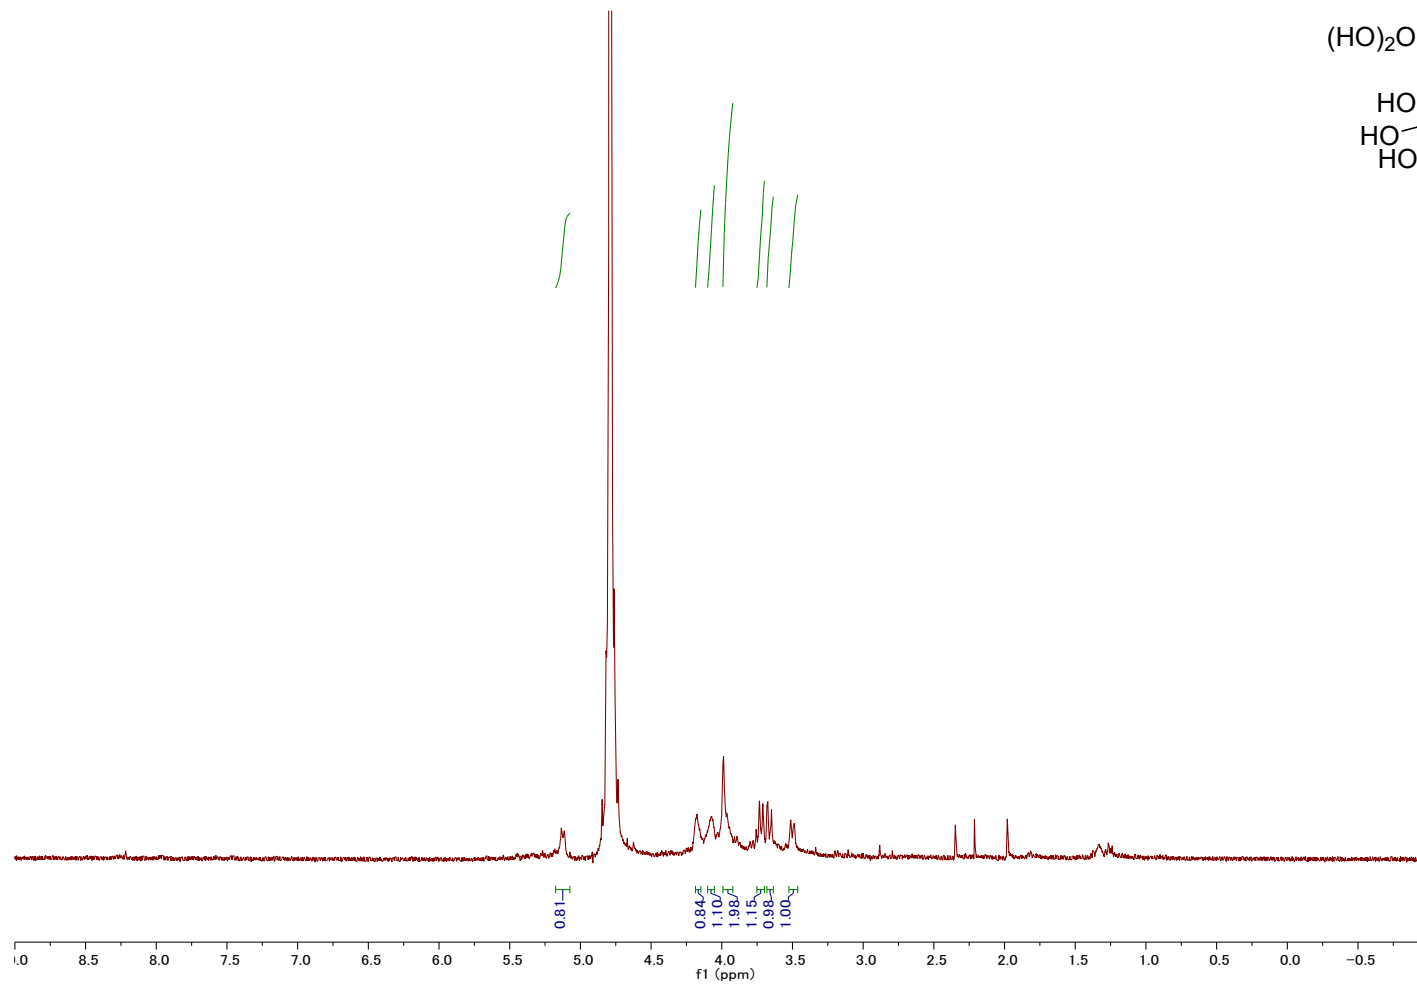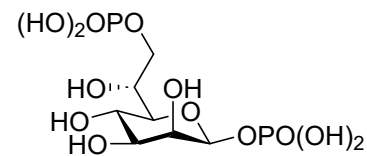

1,7-*O*-Bisphosphoryl- $\beta$ -D-glycero-D-manno-heptopyranose (HBP)  $^{13}\text{C}$  NMR (100 MHz,  $\text{D}_2\text{O}$ )

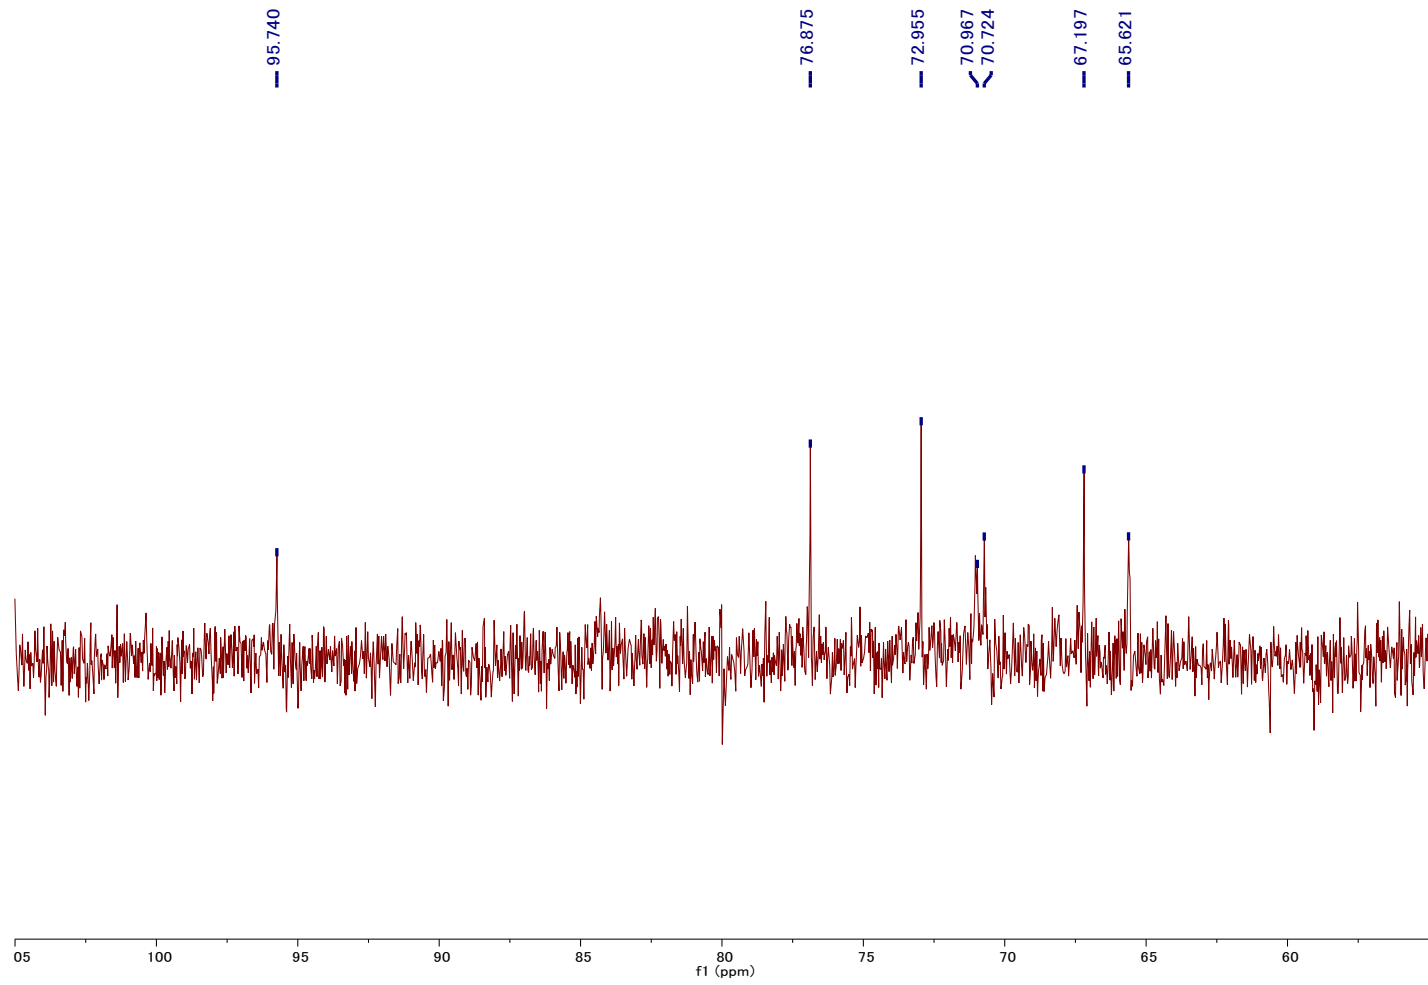

1,7-*O*-Bisphosphoryl- $\beta$ -D-glycero-D-manno-heptopyranose (HBP)  $^{31}\text{P}$  NMR (161 MHz,  $\text{D}_2\text{O}$ )

4.7864  
3.1246

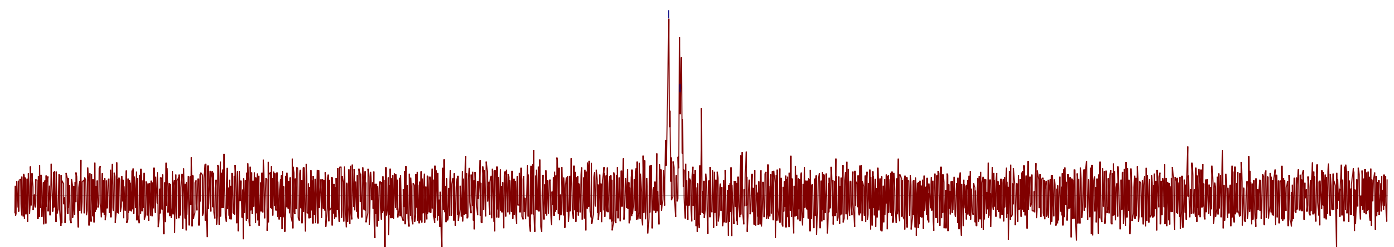

00 90 80 70 60 50 40 30 20 10 0 -10 -20 -30 -40 -50 -60 -70 -80 -90 -1

f1 (ppm)

Allyl 2,6,7-*O*-triacetyl-3-*O*-benzyl-4-*O*-*tert*-butyldimethylsilyl- $\alpha$ -D-glycero-D-manno-heptopyranoside (D-SI1)  $^1\text{H}$  NMR (400 MHz,  $\text{CDCl}_3$ )

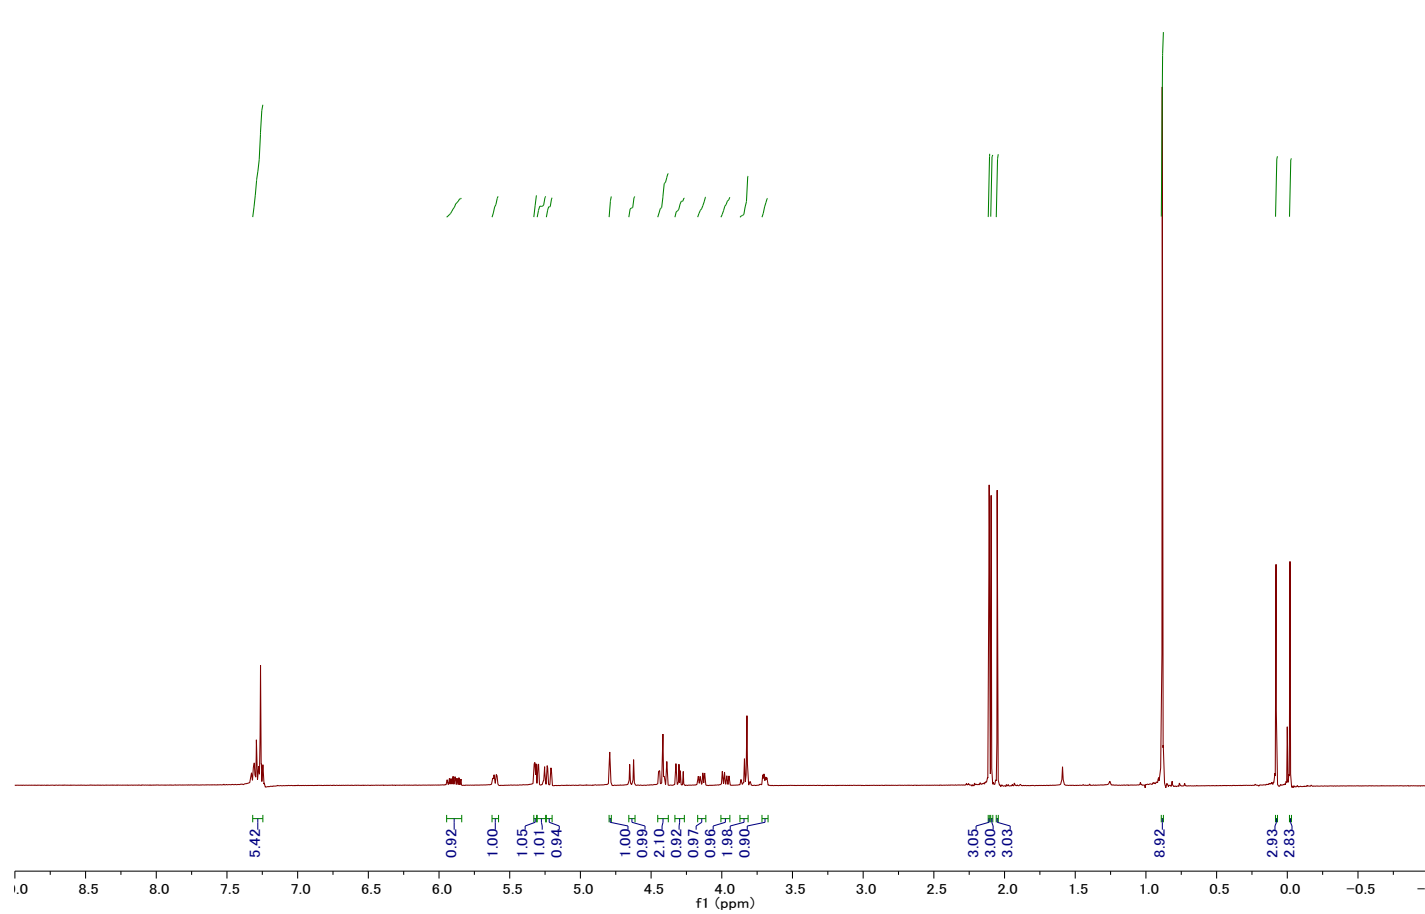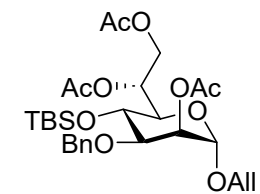



Allyl 2,6,7-*O*-triacetyl-3-*O*-benzyl-4-*O*-*tert*-butyldimethylsilyl- $\alpha$ -D-glycero-D-manno-heptopyranoside (D-SI1)  $^{13}\text{C}$  NMR (100 MHz,  $\text{CDCl}_3$ )

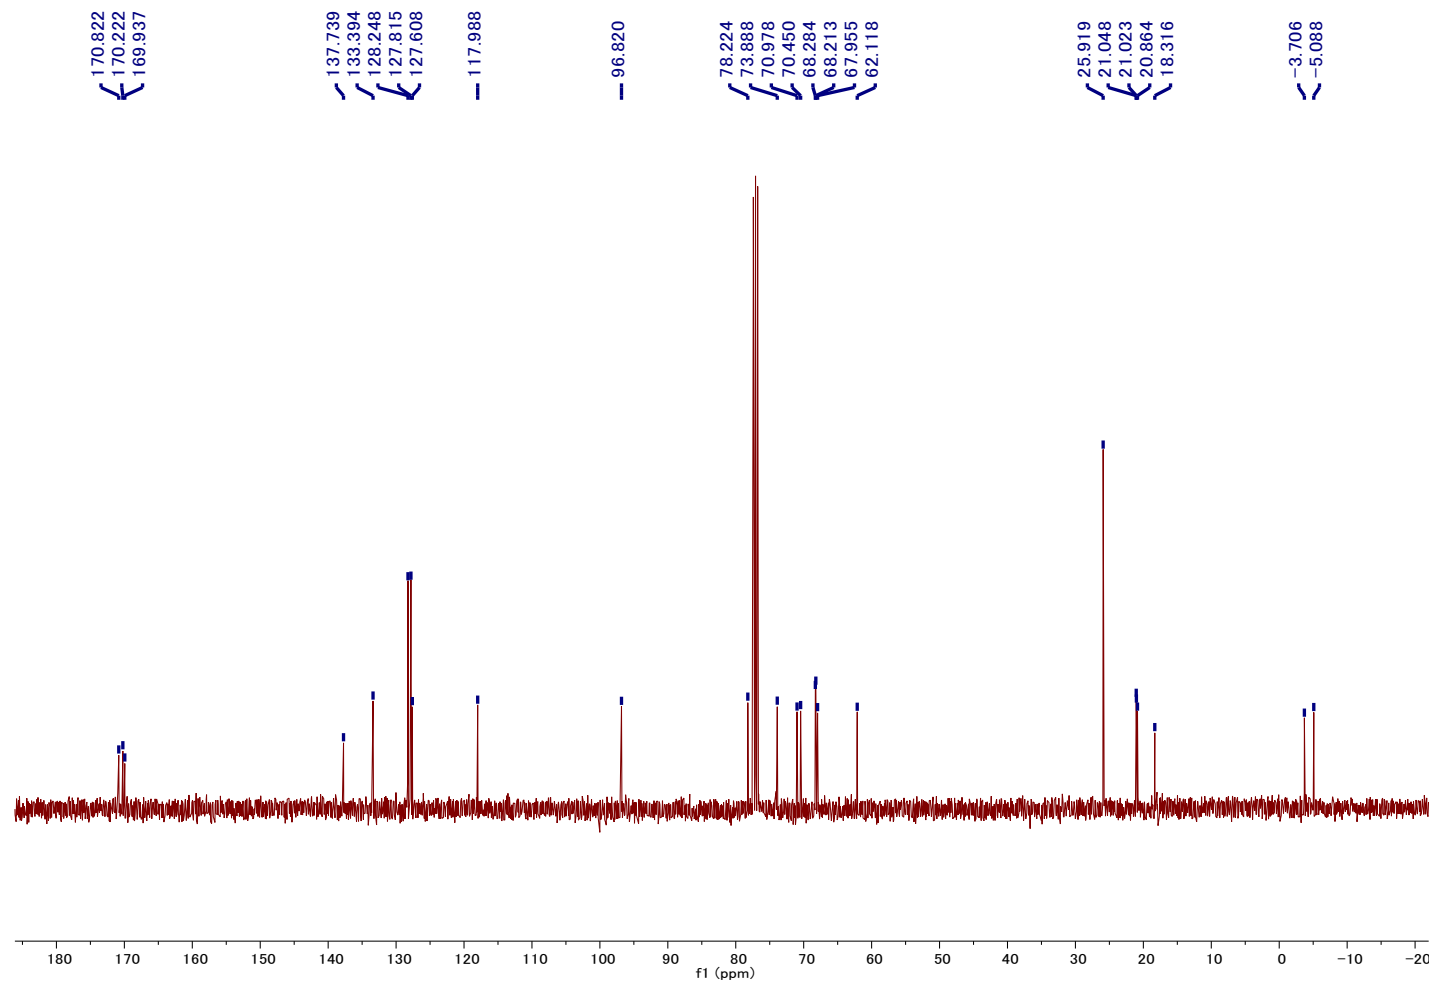

Allyl 2,6,7-*O*-triacetyl-3-*O*-benzyl-4-*O*-*tert*-butyldimethylsilyl- $\alpha$ -L-glycero-D-manno-heptopyranoside (L-S11)  $^1\text{H}$  NMR (400 MHz,  $\text{CDCl}_3$ )

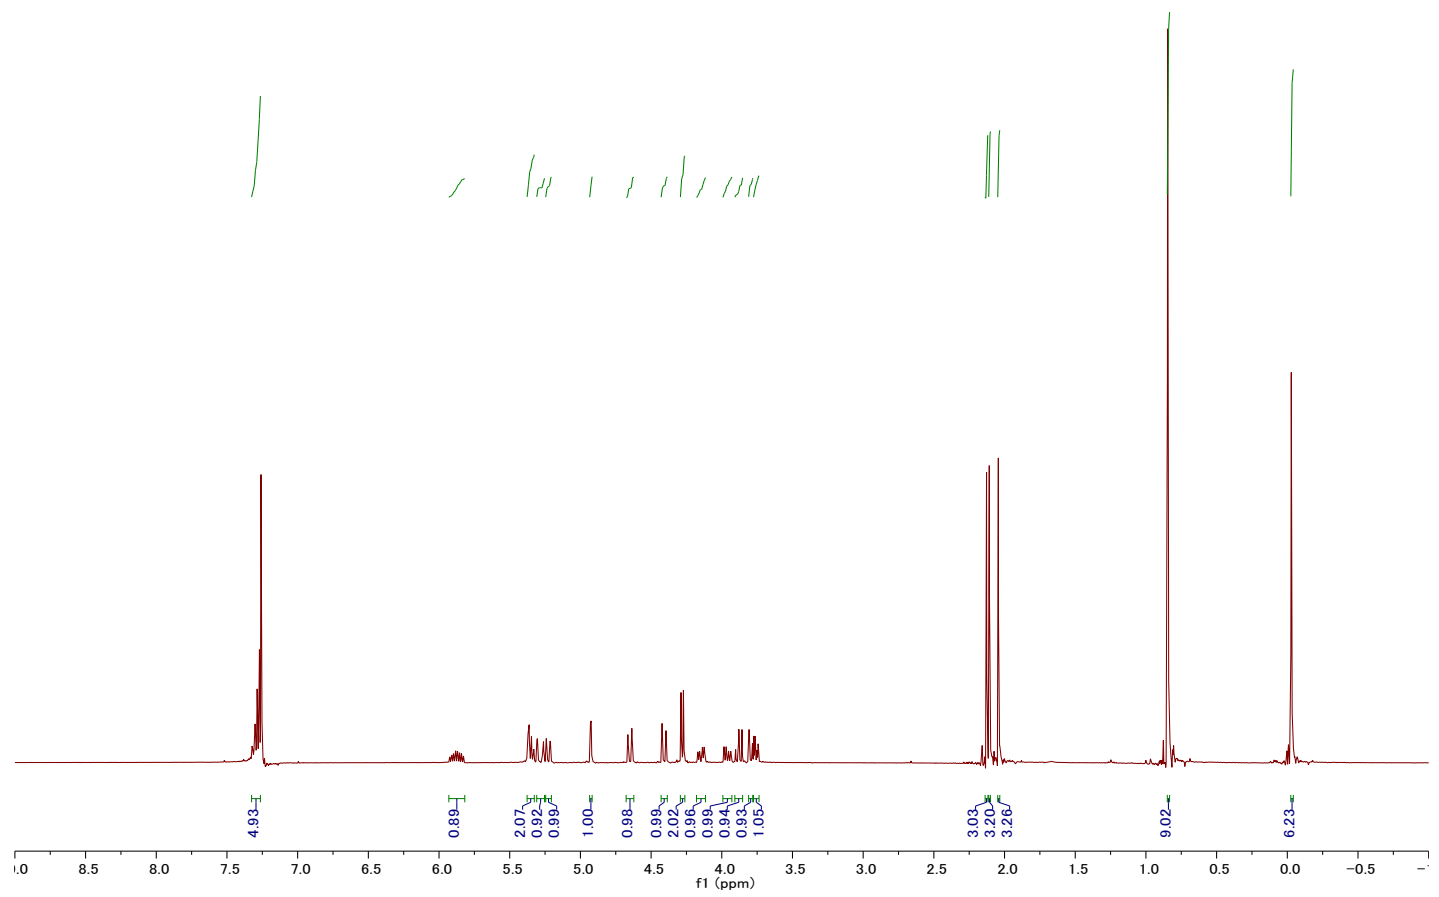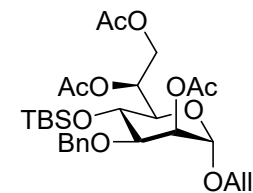

Allyl 2,6,7-*O*-triacetyl-3-*O*-benzyl-4-*O*-*tert*-butyldimethylsilyl- $\alpha$ -L-glycero-D-manno-heptopyranoside (L-S11)  $^{13}\text{C}$  NMR (100 MHz,  $\text{CDCl}_3$ )

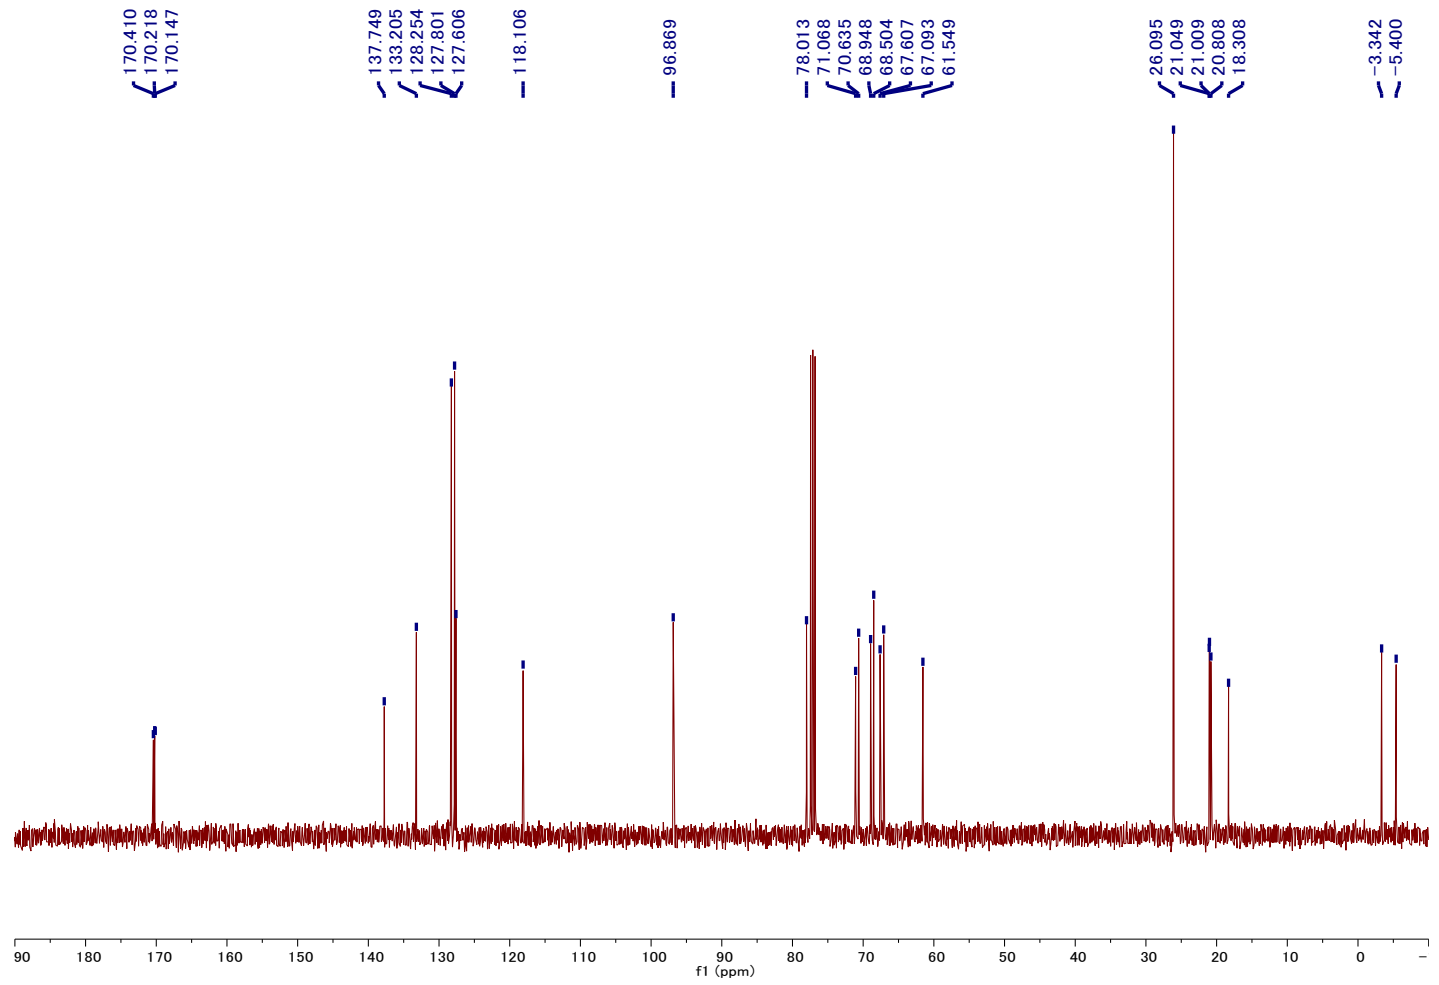

Allyl 2,7-diacetyl-3-O-benzyl-4,6-O-benzylidene- $\alpha$ -L-glycero-D-manno-heptopyranoside (SI2)  $^1\text{H}$  NMR (400 MHz,  $\text{CDCl}_3$ )

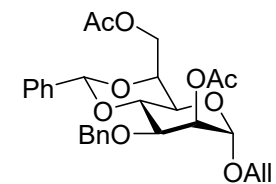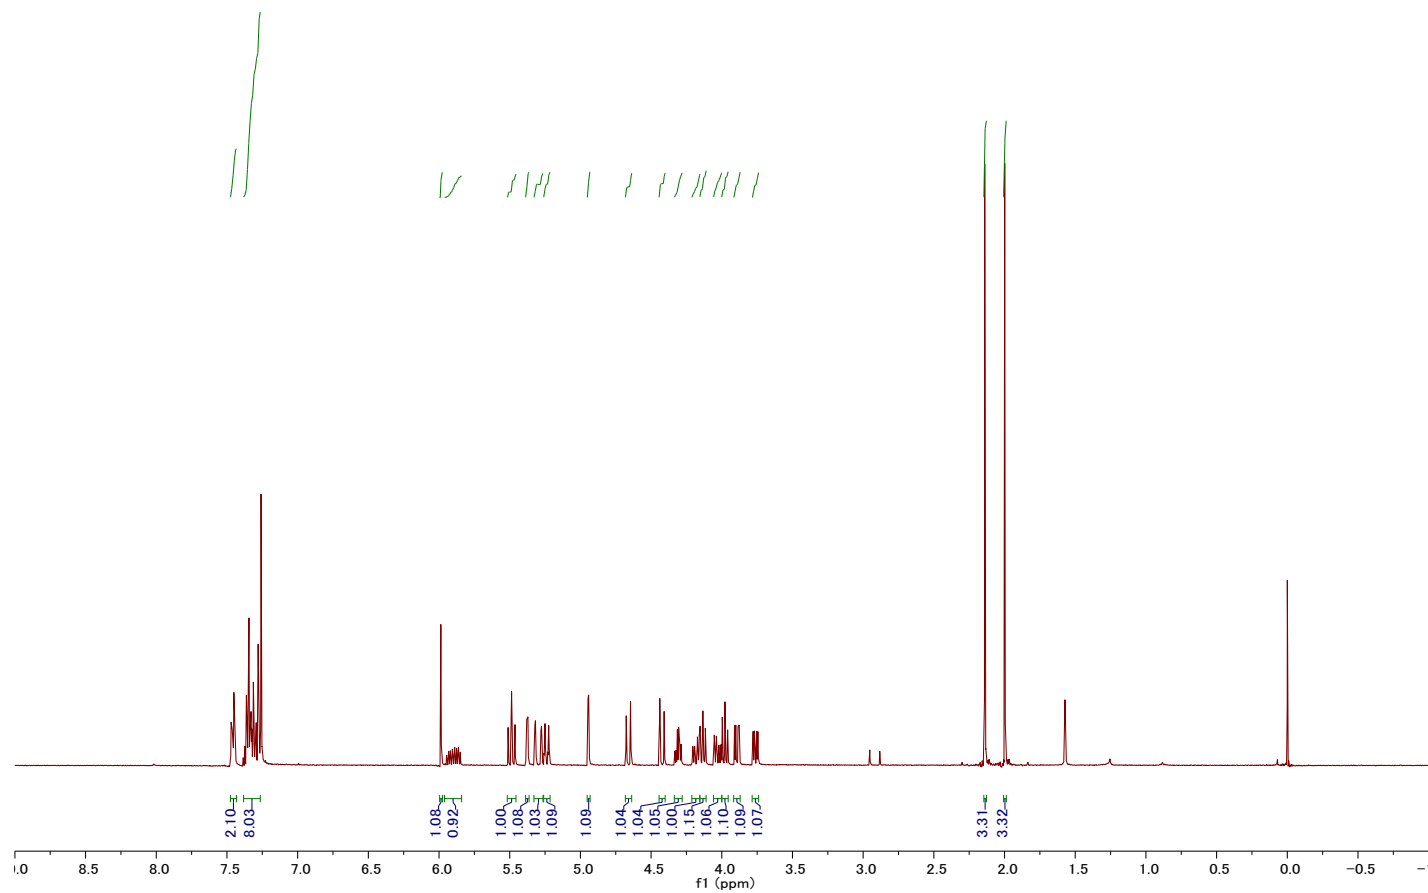

Allyl 2,7-diacetyl-3-O-benzyl-4,6-O-benzylidene- $\alpha$ -L-glycero-D-manno-heptopyranoside (SI2)  $^{13}\text{C}$  NMR (100 MHz,  $\text{CDCl}_3$ )

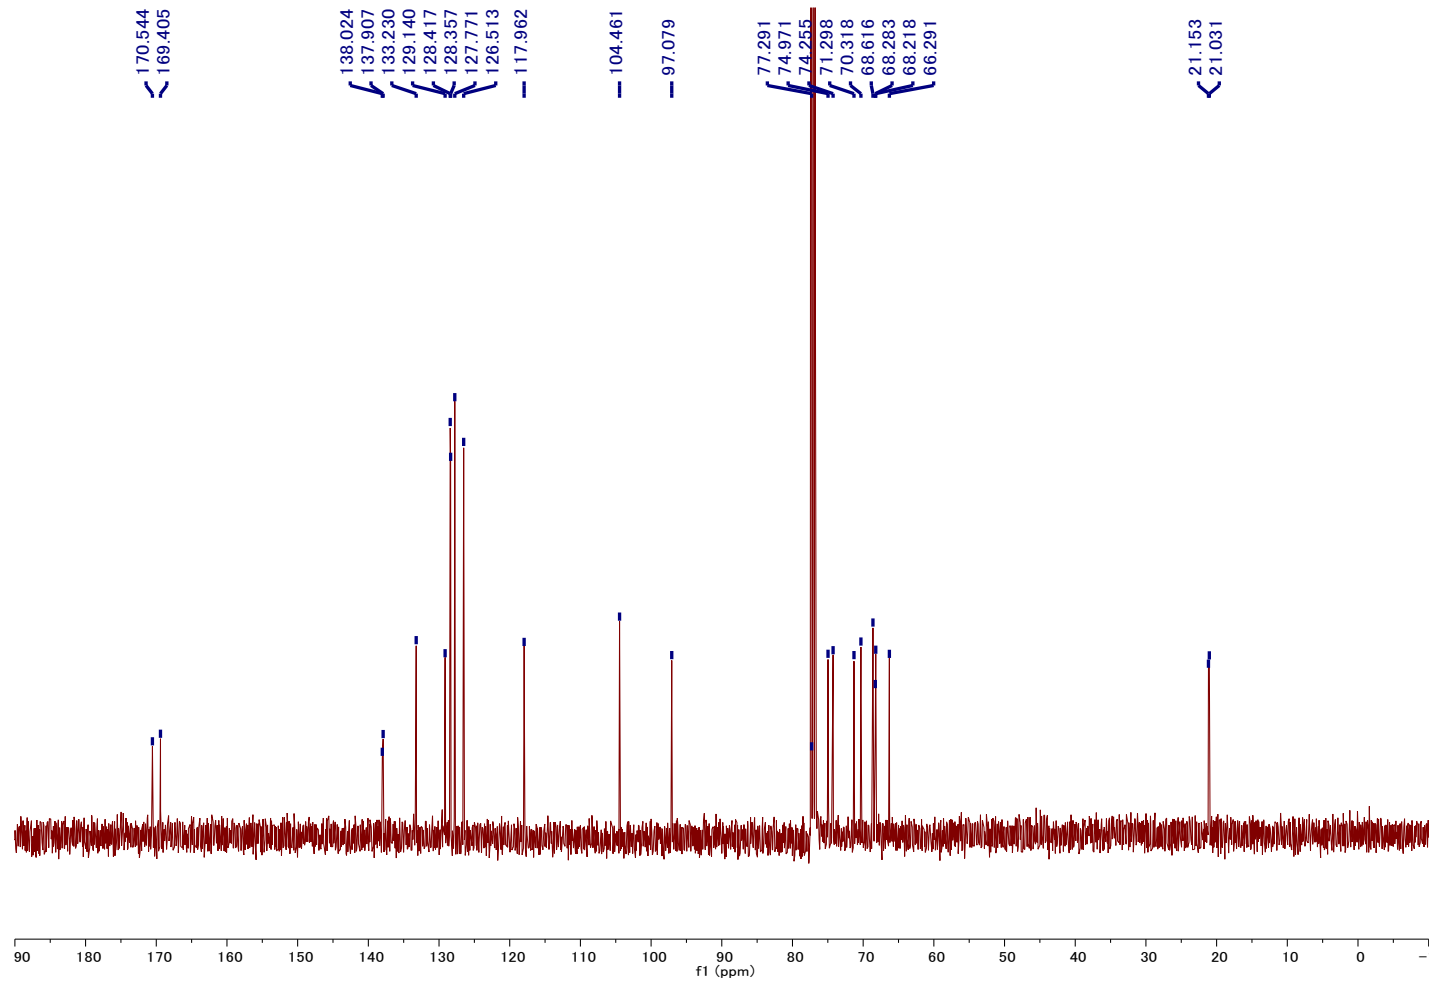

Supplement: d4ob00139g1.pdf [file d4ob00139g1.pdf]
